# Supplementary material for: Droplet-based high-throughput cultivation for accurate screening of antibiotic resistant gut microbes
Source: eLife. 2020 Jun 17;9:e56998. doi: 10.7554/eLife.56998 (PMC7351490; doi:10.7554/eLife.56998)
Supplement: Source data 1. — The droplet generation and cultivation information is listed for each experiment. 2. ASV_Counts_Matrix. The counts matrix for each ASV determined by Minimum Entropy Decomposition (MED) for the raw human stool sample and the human stool cultured on plates and in droplets. 3. ASV_Filtered_Percent_Matrix. Percent matrix for each ASV obtained by filtering the reads using the Matlab analysis file ASV_Filtering.m. 4. Sequences_Taxonomy. Closest taxonomic assignment of each ASV from raw and cultivated human stool samples. 5. Sequences. Sequences from MED analysis for raw and cultivated human stool samples. 6. Ecological_Measures. Richness, Diversity, Dominance, and Number Rare measurements for each sample and the intra-phyla richness and diversity across all 4 detected phyla. 7. Oligotyping_Percent_Matrix. Percent matrix for Bacteroides oligotype assignment for each sample. 8. Oligotyping_Representatives. Oligotypes of Bacteroides spp. 9. Sorting_Enhancement_Ratio. Enhancement ratio for ASVs which were <1% abundant in the raw stool sample but >1% in the droplet sorting experiments. 10. Sanger_Consensus_Sequences. The consensus sequence for each of 24 randomly picked colonies from sorted droplets which were streaked onto a plate. For each sequence, the closest BLAST taxonomic assignment along with percent identity is also listed. [file elife-56998-data1.xlsx]

## Sheet: Experiment_Info
Name	Droplet_Generator	Oil_Flow_Rate (mL/hr)	Liquid_Flow_Rate (mL/hr)	Cultivation Time
BHIS_DROPL_1D1	1	4	1.5	1 day
BHIS_DROPL_1D1_SORTED	1	4	1.5	1 day
BHIS_DROPL_1D2	2	2	0.6	1 day
BHIS_DROPL_2D2	2	2	0.6	2 days
BHIS_DROPL_1D3	2	2	0.6	1 day
BHIS_DROPL_1D3_SORTED	2	2	0.6	1 day
BHIS_DROPL_2D3	2	2	0.6	2 days
BHIS_PLATE_3D	n/a	n/a	n/a	3 days
GMM_DROPL_1D	2	2	0.6	1 day
GMM_DROPL_2D	2	2	0.6	2 days
GMM_PLATE_3D1	n/a	n/a	n/a	3 days
GMM_PLATE_3D2	n/a	n/a	n/a	3 days
GMM_PLATE_7D	n/a	n/a	n/a	7 days
RAW_STOOL_DNA	n/a	n/a	n/a	n/a
YCFA_DROPL_1D	2	2	0.6	1 day
YCFA_DROPL_2D	2	2	0.6	2 days
YCFA_DROPL_3D1	n/a	n/a	n/a	3 days
YCFA_DROPL_3D2	n/a	n/a	n/a	3 days
YCFA_DROPL_7D	n/a	n/a	n/a	7 days
AMP_DROPL_1D1	2	2	0.6	1 day
AMP_PLATE_3D1	n/a	n/a	n/a	3 days
AMP_PLATE_3D2	n/a	n/a	n/a	3 days
CIPRO_DROPL_1D1	2	2	0.6	1 day
CIPRO_PLATE_3D1	n/a	n/a	n/a	3 days
CIPRO_PLATE_3D2	n/a	n/a	n/a	3 days
VANCO_DROPL_1D1	2	2	0.6	1 day
VANCO_PLATE_3D1	n/a	n/a	n/a	3 days
VANCO_PLATE_3D2	n/a	n/a	n/a	3 days

## Sheet: ASV_Counts_Matrix
samples	AMP_DROPL_1D1	AMP_PLATE_3D1	AMP_PLATE_3D2	BHIS_DROPL_1D1	BHIS_DROPL_1D1_SORTED	BHIS_DROPL_1D2	BHIS_DROPL_1D3	BHIS_DROPL_1D3_SORTED	BHIS_DROPL_2D2	BHIS_DROPL_2D3	BHIS_PLATE_3D	CIPRO_DROPL_1D1	CIPRO_PLATE_3D1	CIPRO_PLATE_3D2	GMM_DROPL_1D	GMM_DROPL_2D	GMM_PLATE_3D1	GMM_PLATE_3D2	GMM_PLATE_7D	RAW_STOOL	VANCO_DROPL_1D1	VANCO_PLATE_3D1	VANCO_PLATE_3D2	YCFA_DROPL_1D	YCFA_DROPL_2D	YCFA_PLATE_3D1	YCFA_PLATE_3D2	YCFA_PLATE_7D	Kingdom	Phylum	Class	Order	Family	Genus	Species
1	2	0	0	18	103	30	33	53	33	5	0	0	0	0	31	13	0	1	0	51	1	0	0	488	678	0	0	0	D_0__Bacteria	D_1__Bacteroidetes	D_2__Bacteroidia	D_3__Bacteroidales	D_4__Prevotellaceae	D_5__Paraprevotella	D_6__uncultured bacterium
3	0	0	0	73	810	51	33	27	48	36	1	13	0	2	27	22	0	0	0	77	2	0	0	104	74	0	0	0	D_0__Bacteria	D_1__Firmicutes	D_2__Clostridia	D_3__Clostridiales	D_4__Ruminococcaceae	D_5__Ruminococcaceae UCG-013	D_6__uncultured bacterium
9	0	0	0	0	4	0	0	11	1	4	0	0	0	0	0	0	17	12	73	0	0	0	0	2	7	0	0	0	D_0__Bacteria	D_1__Firmicutes	D_2__Clostridia	D_3__Clostridiales	D_4__Lachnospiraceae	D_5__[Eubacterium] hallii group	D_6__uncultured bacterium
12	9	0	0	2	2	1	1	1	4	0	0	0	0	0	0	0	0	0	0	148	6	0	0	0	0	0	0	0	D_0__Bacteria	D_1__Bacteroidetes	D_2__Bacteroidia	D_3__Bacteroidales	D_4__Prevotellaceae	D_5__Prevotella 2	D_6__uncultured bacterium
19	2	0	0	92	473	32	88	1543	118	52	0	50	0	5	34	13	55	53	26	26	0	0	0	119	77	271	156	540	D_0__Bacteria	D_1__Actinobacteria	D_2__Coriobacteriia	D_3__Coriobacteriales	D_4__Coriobacteriaceae	D_5__Collinsella	D_6__uncultured bacterium
22	78	0	0	0	14	1	0	10	3	0	0	24	0	0	5	0	0	0	0	1	135	0	0	4	0	0	0	0	D_0__Bacteria	D_1__Proteobacteria	D_2__Gammaproteobacteria	D_3__Pseudomonadales	D_4__Pseudomonadaceae	D_5__Pseudomonas	D_6__
23	0	0	0	0	0	0	1	0	0	0	0	2	0	0	0	0	73	44	63	0	0	0	0	0	0	0	0	0	D_0__Bacteria	D_1__Firmicutes	D_2__Clostridia	D_3__Clostridiales	D_4__Lachnospiraceae	D_5__Lachnoclostridium	D_6__
24	0	0	0	4	3	6	10	3	9	5	0	0	0	0	8	3	0	0	0	109	4	0	0	4	6	0	0	0	D_0__Bacteria	D_1__Firmicutes	D_2__Clostridia	D_3__Clostridiales	D_4__Lachnospiraceae	D_5__Lachnospira	D_6__
25	14	0	0	14	5	3	10	23	20	13	0	5	0	0	1	4	0	3	1	5	0	0	0	1	4	0	0	0	D_0__Bacteria	D_1__Bacteroidetes	D_2__Bacteroidia	D_3__Bacteroidales	D_4__Porphyromonadaceae	D_5__Butyricimonas	D_6__
27	4	0	0	10	22	35	18	18	41	12	0	6	0	0	38	15	0	0	0	534	17	0	0	30	14	0	0	0	D_0__Bacteria	D_1__Firmicutes	D_2__Clostridia	D_3__Clostridiales	D_4__Ruminococcaceae	D_5__Ruminiclostridium 6	D_6__uncultured bacterium
43	1	0	0	35	33	13	84	25	47	40	5	43	51	115	34	11	0	0	0	0	48	257	226	21	11	0	0	0	D_0__Bacteria	D_1__Proteobacteria	D_2__Gammaproteobacteria	D_3__Enterobacteriales	D_4__Enterobacteriaceae	D_5__	D_6__
44	0	0	0	5	3	3	1	2	1	3	4	7	12	35	6	2	0	0	0	1	20	49	56	0	2	0	0	0	D_0__Bacteria	D_1__Proteobacteria	D_2__Gammaproteobacteria	D_3__Enterobacteriales	D_4__Enterobacteriaceae	D_5__	D_6__
47	0	0	0	0	2	3	7	3	4	3	0	3	0	0	11	1	0	0	0	172	5	0	0	3	2	0	0	0	D_0__Bacteria	D_1__Firmicutes	D_2__Clostridia	D_3__Clostridiales	D_4__Lachnospiraceae	D_5__Roseburia	D_6__
49	0	0	0	0	0	0	0	0	0	0	0	0	0	0	0	0	0	104	15	34	0	0	0	1	0	0	0	0	D_0__Bacteria	D_1__Firmicutes	D_2__Clostridia	D_3__Clostridiales	D_4__Lachnospiraceae	D_5__Roseburia	D_6__uncultured bacterium
52	1	0	0	25	250	13	22	23	43	22	0	0	0	0	6	17	0	0	0	8	1	0	0	11	60	0	0	0	D_0__Bacteria	D_1__Bacteroidetes	D_2__Bacteroidia	D_3__Bacteroidales	D_4__Rikenellaceae	D_5__Alistipes	D_6__
57	0	0	0	5	13	2	11	4	13	2	1	2	0	0	1	0	16	17	39	31	8	0	0	3	9	0	0	0	D_0__Bacteria	D_1__Firmicutes	D_2__Clostridia	D_3__Clostridiales	D_4__Ruminococcaceae	D_5__	D_6__
67	0	0	0	3	2	4	6	0	13	4	0	5	0	0	6	0	64	75	45	100	0	0	0	3	3	0	0	0	D_0__Bacteria	D_1__Firmicutes	D_2__Clostridia	D_3__Clostridiales	D_4__Lachnospiraceae	D_5__Blautia	D_6__
75	3	0	0	9	12	6	4	5	12	0	1	22	32	36	4	7	0	0	0	1	56	52	45	3	8	0	0	0	D_0__Bacteria	D_1__Proteobacteria	D_2__Gammaproteobacteria	D_3__Enterobacteriales	D_4__Enterobacteriaceae	D_5__Hafnia-Obesumbacterium	D_6__
263	73	242	301	140	47	101	133	26	187	93	39	84	4	11	76	77	261	255	113	29	0	0	0	144	48	2	1	0	D_0__Bacteria	D_1__Bacteroidetes	D_2__Bacteroidia	D_3__Bacteroidales	D_4__Bacteroidaceae	D_5__Bacteroides	D_6__
268	0	0	0	14	0	3	14	1	24	10	4	9	0	0	6	2	95	47	18	2	0	0	0	5	1	0	0	0	D_0__Bacteria	D_1__Bacteroidetes	D_2__Bacteroidia	D_3__Bacteroidales	D_4__Bacteroidaceae	D_5__Bacteroides	D_6__
270	25	1	6	39	3	19	27	20	47	13	0	27	0	0	23	10	20	19	14	35	1	0	0	50	20	0	0	0	D_0__Bacteria	D_1__Bacteroidetes	D_2__Bacteroidia	D_3__Bacteroidales	D_4__Bacteroidaceae	D_5__Bacteroides	D_6__
271	0	0	0	6	0	0	7	1	25	7	1	3	0	1	1	5	83	39	12	1	0	0	0	2	0	0	0	0	D_0__Bacteria	D_1__Bacteroidetes	D_2__Bacteroidia	D_3__Bacteroidales	D_4__Bacteroidaceae	D_5__Bacteroides	D_6__
314	24	0	0	126	517	113	100	62	211	64	1	20	0	0	85	37	0	0	0	1114	23	0	0	370	230	1	2	1	D_0__Bacteria	D_1__Firmicutes	D_2__Clostridia	D_3__Clostridiales	D_4__Ruminococcaceae	D_5__Ruminococcus 2	D_6__uncultured bacterium
371	1	0	0	81	131	102	164	113	112	66	69	33	12	37	132	88	0	0	0	4	50	44	43	125	104	0	0	0	D_0__Bacteria	D_1__Proteobacteria	D_2__Gammaproteobacteria	D_3__Enterobacteriales	D_4__Enterobacteriaceae	D_5__Hafnia-Obesumbacterium	D_6__
374	0	0	0	2	5	59	100	61	62	54	42	0	1	0	61	43	0	0	0	0	0	2	1	69	60	0	0	0	D_0__Bacteria	D_1__Proteobacteria	D_2__Gammaproteobacteria	D_3__Enterobacteriales	D_4__Enterobacteriaceae	D_5__Hafnia-Obesumbacterium	D_6__
375	12	0	0	248	352	59	120	73	85	36	36	101	77	81	82	50	0	0	0	14	176	135	142	55	92	0	0	0	D_0__Bacteria	D_1__Proteobacteria	D_2__Gammaproteobacteria	D_3__Enterobacteriales	D_4__Enterobacteriaceae	D_5__Hafnia-Obesumbacterium	D_6__
417	0	0	0	5	51	5	18	31	8	5	0	48	43	15	117	56	0	0	0	34	1	0	0	5	1	0	0	0	D_0__Bacteria	D_1__Firmicutes	D_2__Bacilli	D_3__Lactobacillales	D_4__Carnobacteriaceae	D_5__Carnobacterium	D_6__
419	0	0	0	0	0	0	0	0	0	0	313	0	0	0	0	0	0	0	0	0	0	0	0	0	8	6	3	1	D_0__Bacteria	D_1__Firmicutes	D_2__Clostridia	D_3__Clostridiales	D_4__Peptostreptococcaceae	D_5__	D_6__
454	0	0	0	3	58	6	0	3	4	3	1	4	0	0	1	1	2	1	0	17	0	0	1	3	7	925	626	142	D_0__Bacteria	D_1__Firmicutes	D_2__Bacilli	D_3__Lactobacillales	D_4__Streptococcaceae	D_5__Streptococcus	D_6__
455	2	0	0	17	37	5	27	5	132	3	175	2	0	9	8	69	299	137	372	120	6	29	39	8	3	0	0	0	D_0__Bacteria	D_1__Firmicutes	D_2__Negativicutes	D_3__Selenomonadales	D_4__Acidaminococcaceae	D_5__Phascolarctobacterium	D_6__uncultured bacterium
456	0	0	0	74	388	19	12	30	98	78	0	6	0	0	1	4	0	0	0	8	0	0	0	13	141	0	0	0	D_0__Bacteria	D_1__Bacteroidetes	D_2__Bacteroidia	D_3__Bacteroidales	D_4__Rikenellaceae	D_5__Alistipes	D_6__
509	2	0	0	117	29	76	215	93	434	82	97	408	0	19	34	44	864	432	217	97	2	0	0	160	184	7	6	18	D_0__Bacteria	D_1__Firmicutes	D_2__Clostridia	D_3__Clostridiales	D_4__Lachnospiraceae	D_5__	D_6__
510	7	0	0	71	16	36	110	54	254	51	74	247	0	12	16	29	484	227	134	53	1	0	0	71	110	12	4	6	D_0__Bacteria	D_1__Firmicutes	D_2__Clostridia	D_3__Clostridiales	D_4__Lachnospiraceae	D_5__	D_6__
546	0	0	0	20	5	15	17	5	10	15	4	3	0	0	10	8	4	6	4	6	0	0	0	25	6	0	0	1	D_0__Bacteria	D_1__Bacteroidetes	D_2__Bacteroidia	D_3__Bacteroidales	D_4__Bacteroidaceae	D_5__Bacteroides	D_6__
547	0	0	0	1	2	2	0	0	3	0	42	0	0	0	0	0	41	48	0	0	0	0	0	0	1	0	0	0	D_0__Bacteria	D_1__Firmicutes	D_2__Clostridia	D_3__Clostridiales	D_4__Lachnospiraceae	D_5__[Eubacterium] fissicatena group	D_6__
623	20	0	0	88	37	31	70	173	168	55	0	4	2	0	18	7	3	2	0	8	22	0	0	86	92	0	0	0	D_0__Bacteria	D_1__Bacteroidetes	D_2__Bacteroidia	D_3__Bacteroidales	D_4__Porphyromonadaceae	D_5__Odoribacter	D_6__
626	9	0	0	32	6	4	23	61	72	22	0	2	0	0	9	6	3	2	0	6	6	0	0	22	33	0	0	0	D_0__Bacteria	D_1__Bacteroidetes	D_2__Bacteroidia	D_3__Bacteroidales	D_4__Porphyromonadaceae	D_5__Odoribacter	D_6__
665	3	0	0	34	20	5	47	19	39	35	8	34	60	71	22	6	0	0	0	0	32	158	197	16	10	0	0	0	D_0__Bacteria	D_1__Proteobacteria	D_2__Gammaproteobacteria	D_3__Enterobacteriales	D_4__Enterobacteriaceae	D_5__Hafnia-Obesumbacterium	D_6__
666	3	0	0	12	27	11	39	8	13	10	14	6	7	13	18	10	0	0	0	1	18	18	11	30	19	0	0	0	D_0__Bacteria	D_1__Proteobacteria	D_2__Gammaproteobacteria	D_3__Enterobacteriales	D_4__Enterobacteriaceae	D_5__Hafnia-Obesumbacterium	D_6__
699	1	0	3	50	34	17	51	25	84	23	860	34	0	3	22	18	1895	1566	850	53	3	0	0	55	48	0	0	0	D_0__Bacteria	D_1__Bacteroidetes	D_2__Bacteroidia	D_3__Bacteroidales	D_4__Bacteroidaceae	D_5__Bacteroides	D_6__
733	0	0	0	31	212	10	15	3	76	24	0	0	0	0	4	12	0	0	0	8	0	0	0	13	193	0	0	0	D_0__Bacteria	D_1__Bacteroidetes	D_2__Bacteroidia	D_3__Bacteroidales	D_4__Rikenellaceae	D_5__Alistipes	D_6__
735	1	0	0	1	6	3	3	0	6	0	0	2	0	0	5	1	0	0	5	113	9	0	0	2	0	0	0	0	D_0__Bacteria	D_1__Firmicutes	D_2__Clostridia	D_3__Clostridiales	D_4__Lachnospiraceae	D_5__[Eubacterium] ruminantium group	D_6__uncultured bacterium
764	14	0	0	0	0	0	0	1	0	0	1	51	84	226	1	0	0	0	0	0	119	262	339	1	0	0	0	0	D_0__Bacteria	D_1__Proteobacteria	D_2__Gammaproteobacteria	D_3__Enterobacteriales	D_4__Enterobacteriaceae	D_5__	D_6__
766	23	0	0	106	61	79	154	147	106	90	51	83	159	366	114	71	0	0	0	7	125	574	397	101	74	0	0	0	D_0__Bacteria	D_1__Proteobacteria	D_2__Gammaproteobacteria	D_3__Enterobacteriales	D_4__Enterobacteriaceae	D_5__	D_6__
768	23	0	0	46	11	48	79	54	43	28	1	36	7	43	48	35	0	0	0	14	38	3	0	72	86	0	0	0	D_0__Bacteria	D_1__Proteobacteria	D_2__Gammaproteobacteria	D_3__Enterobacteriales	D_4__Enterobacteriaceae	D_5__	D_6__
770	0	0	0	1	2	20	21	16	14	23	32	1	0	1	12	14	0	0	0	0	0	2	0	20	18	0	0	0	D_0__Bacteria	D_1__Proteobacteria	D_2__Gammaproteobacteria	D_3__Enterobacteriales	D_4__Enterobacteriaceae	D_5__	D_6__
775	2	0	0	33	39	10	23	20	18	15	13	12	16	36	16	19	0	0	0	8	25	48	55	14	5	0	0	0	D_0__Bacteria	D_1__Proteobacteria	D_2__Gammaproteobacteria	D_3__Enterobacteriales	D_4__Enterobacteriaceae	D_5__Serratia	D_6__
778	2	0	0	0	0	0	0	0	0	0	0	6	14	29	0	0	0	0	0	0	17	53	22	0	0	0	0	0	D_0__Bacteria	D_1__Proteobacteria	D_2__Gammaproteobacteria	D_3__Enterobacteriales	D_4__Enterobacteriaceae	D_5__	D_6__
810	2	329	1676	29	49	34	54	34	24	37	4	3	8	7	20	7	39	37	10	30	0	0	0	32	15	0	0	0	D_0__Bacteria	D_1__Bacteroidetes	D_2__Bacteroidia	D_3__Bacteroidales	D_4__Bacteroidaceae	D_5__Bacteroides	D_6__
813	2	0	0	0	0	0	0	0	0	0	0	0	0	0	0	0	63	44	77	0	0	0	0	0	0	0	0	0	D_0__Bacteria	D_1__Firmicutes	D_2__Clostridia	D_3__Clostridiales	D_4__Lachnospiraceae	D_5__Lachnoclostridium	D_6__
850	0	0	0	16	353	5	43	296	16	13	0	0	0	0	130	61	0	0	0	7	4	0	0	4	2	0	0	0	D_0__Bacteria	D_1__Firmicutes	D_2__Bacilli	D_3__Lactobacillales	D_4__Lactobacillaceae	D_5__Lactobacillus	D_6__uncultured bacterium
853	0	0	0	44	27	10	10	7	27	3	47	3	9	7	55	87	8	2	4	0	1	0	0	3	6	35	12	15	D_0__Bacteria	D_1__Firmicutes	D_2__Bacilli	D_3__Lactobacillales	D_4__Enterococcaceae	D_5__Enterococcus	D_6__
885	6	0	0	2	2	7	3	0	1	1	0	4	0	0	10	0	0	0	0	88	11	1	0	9	9	0	0	0	D_0__Bacteria	D_1__Firmicutes	D_2__Clostridia	D_3__Clostridiales	D_4__Ruminococcaceae	D_5__Ruminococcaceae UCG-014	D_6__uncultured bacterium
887	0	0	0	41	14	10	7	24	6	0	326	13	66	163	0	2	78	78	74	1	4	0	0	2	13	201	371	632	D_0__Bacteria	D_1__Firmicutes	D_2__Clostridia	D_3__Clostridiales	D_4__Clostridiaceae 1	D_5__Clostridium sensu stricto 1	D_6__
888	0	0	0	10	0	0	1	4	1	0	25	0	7	14	1	0	11	10	11	0	0	0	0	0	1	14	37	43	D_0__Bacteria	D_1__Firmicutes	D_2__Clostridia	D_3__Clostridiales	D_4__Clostridiaceae 1	D_5__Clostridium sensu stricto 1	D_6__
937	2	0	0	5	13	16	10	7	15	6	0	3	0	0	18	9	0	0	0	215	5	0	0	14	15	0	0	0	D_0__Bacteria	D_1__Firmicutes	D_2__Clostridia	D_3__Clostridiales	D_4__Ruminococcaceae	D_5__Ruminiclostridium 6	D_6__
967	0	0	0	34	7	13	13	11	26	22	11	7	0	25	16	18	108	98	56	22	0	0	0	10	13	0	1	3	D_0__Bacteria	D_1__Bacteroidetes	D_2__Bacteroidia	D_3__Bacteroidales	D_4__Porphyromonadaceae	D_5__Parabacteroides	D_6__
971	3	0	0	1	2	3	5	7	6	3	0	1	0	0	13	4	0	0	2	209	5	0	0	3	4	0	0	9	D_0__Bacteria	D_1__Firmicutes	D_2__Clostridia	D_3__Clostridiales	D_4__Ruminococcaceae	D_5__Faecalibacterium	D_6__uncultured bacterium
976	0	0	0	10	12	11	3	0	25	33	0	6	0	0	5	4	0	0	0	10	8	0	0	12	26	0	0	0	D_0__Bacteria	D_1__Bacteroidetes	D_2__Bacteroidia	D_3__Bacteroidales	D_4__Rikenellaceae	D_5__Alistipes	D_6__
1017	0	0	0	0	0	0	0	0	0	0	30	0	0	0	0	0	130	147	172	0	0	0	0	0	0	0	0	0	D_0__Bacteria	D_1__Firmicutes	D_2__Clostridia	D_3__Clostridiales	D_4__Lachnospiraceae	D_5__Lachnoclostridium	D_6__
1069	0	0	0	13	53	10	16	13	18	6	8	21	0	0	13	7	56	66	15	223	0	0	0	10	6	123	73	72	D_0__Bacteria	D_1__Firmicutes	D_2__Erysipelotrichia	D_3__Erysipelotrichales	D_4__Erysipelotrichaceae	D_5__Erysipelotrichaceae UCG-003	D_6__uncultured bacterium
1070	0	0	0	0	0	0	0	0	0	0	0	0	0	0	3	0	393	366	127	0	0	0	0	0	4	17	14	6	D_0__Bacteria	D_1__Firmicutes	D_2__Bacilli	D_3__Bacillales	D_4__Bacillaceae	D_5__Bacillus	D_6__
1109	0	0	0	22	12	5	5	59	20	7	0	4	0	0	0	0	0	0	0	0	0	0	0	0	0	0	0	1	D_0__Bacteria	D_1__Bacteroidetes	D_2__Bacteroidia	D_3__Bacteroidales	D_4__Rikenellaceae	D_5__Alistipes	D_6__
1110	3	0	0	28	39	49	46	23	68	27	0	53	0	0	44	21	9	7	11	708	4	0	0	104	69	5	0	1	D_0__Bacteria	D_1__Firmicutes	D_2__Clostridia	D_3__Clostridiales	D_4__Lachnospiraceae	D_5__Blautia	D_6__uncultured bacterium
1113	5	0	0	2	2	6	4	1	0	2	0	0	0	0	4	3	0	0	0	155	2	0	0	2	0	0	0	0	D_0__Bacteria	D_1__Firmicutes	D_2__Clostridia	D_3__Clostridiales	D_4__Lachnospiraceae	D_5__Lachnospiraceae UCG-003	D_6__uncultured bacterium
1117	8	0	0	5	4	2	3	9	4	3	0	2	0	0	8	7	0	0	0	91	1	0	0	1	7	1	0	0	D_0__Bacteria	D_1__Firmicutes	D_2__Clostridia	D_3__Clostridiales	D_4__Lachnospiraceae	D_5__Blautia	D_6__uncultured bacterium
1174	87	0	293	69	43	30	78	11	152	23	65	61	0	0	45	79	59	44	43	5	1	0	0	26	36	0	1	0	D_0__Bacteria	D_1__Bacteroidetes	D_2__Bacteroidia	D_3__Bacteroidales	D_4__Bacteroidaceae	D_5__Bacteroides	D_6__
1178	0	0	0	6	17	0	5	3	5	6	0	0	0	0	6	0	0	0	0	52	1	0	0	2	0	0	0	0	D_0__Bacteria	D_1__Firmicutes	D_2__Clostridia	D_3__Clostridiales	D_4__Lachnospiraceae	D_5__Coprococcus 2	D_6__uncultured bacterium
1185	15	0	0	2	4	14	13	5	4	1	0	2	0	0	9	3	0	1	0	187	23	0	0	7	2	0	0	0	D_0__Bacteria	D_1__Firmicutes	D_2__Clostridia	D_3__Clostridiales	D_4__Ruminococcaceae	D_5__Subdoligranulum	D_6__uncultured bacterium
1226	17	0	6	92	45	56	65	177	71	47	1	20	0	0	7	9	0	2	0	6	0	0	0	88	128	0	0	0	D_0__Bacteria	D_1__Bacteroidetes	D_2__Bacteroidia	D_3__Bacteroidales	D_4__Rikenellaceae	D_5__Alistipes	D_6__
1227	0	0	0	1	3	7	1	11	1	2	0	0	0	0	0	1	204	137	127	27	0	0	0	1	2	0	0	5	D_0__Bacteria	D_1__Firmicutes	D_2__Clostridia	D_3__Clostridiales	D_4__Lachnospiraceae	D_5__Sellimonas	D_6__
1230	1	0	0	36	16	34	47	29	60	39	25	45	3	0	14	14	313	336	46	65	3	0	0	45	15	0	0	1	D_0__Bacteria	D_1__Bacteroidetes	D_2__Bacteroidia	D_3__Bacteroidales	D_4__Bacteroidaceae	D_5__Bacteroides	D_6__
1231	0	0	0	1	4	5	3	7	5	0	0	0	0	0	3	3	0	0	0	89	4	0	0	2	2	0	0	0	D_0__Bacteria	D_1__Firmicutes	D_2__Clostridia	D_3__Clostridiales	D_4__Lachnospiraceae	D_5__Roseburia	D_6__
1234	0	0	0	10	7	7	11	2	34	11	0	0	0	0	7	3	0	0	0	63	0	0	0	15	45	0	0	0	D_0__Bacteria	D_1__Bacteroidetes	D_2__Bacteroidia	D_3__Bacteroidales	D_4__Rikenellaceae	D_5__Alistipes	D_6__uncultured bacterium
1241	0	0	0	3	4	8	7	2	15	1	0	2	0	0	14	4	0	0	0	120	4	0	0	10	11	0	0	0	D_0__Bacteria	D_1__Firmicutes	D_2__Clostridia	D_3__Clostridiales	D_4__Ruminococcaceae	D_5__Subdoligranulum	D_6__uncultured bacterium
1279	0	0	0	2	5	23	10	7	15	6	2	1	0	0	8	5	676	512	419	120	2	0	0	10	10	1111	610	973	D_0__Bacteria	D_1__Firmicutes	D_2__Clostridia	D_3__Clostridiales	D_4__Lachnospiraceae	D_5__	D_6__
1341	18	85	104	6	2	13	9	1	20	10	5	34	0	3	8	4	28	22	5	3	0	0	0	13	11	0	0	0	D_0__Bacteria	D_1__Bacteroidetes	D_2__Bacteroidia	D_3__Bacteroidales	D_4__Bacteroidaceae	D_5__Bacteroides	D_6__
1343	25	35	49	1	0	1	3	0	4	2	1	16	1	2	2	2	7	11	5	0	0	0	0	1	2	0	0	0	D_0__Bacteria	D_1__Bacteroidetes	D_2__Bacteroidia	D_3__Bacteroidales	D_4__Bacteroidaceae	D_5__Bacteroides	D_6__
1344	9	26	24	11	1	0	16	3	13	5	2	4	0	0	6	6	12	4	1	2	0	0	0	2	3	0	0	0	D_0__Bacteria	D_1__Bacteroidetes	D_2__Bacteroidia	D_3__Bacteroidales	D_4__Bacteroidaceae	D_5__Bacteroides	D_6__
1372	0	0	0	0	0	2	0	0	0	0	0	0	0	0	0	0	150	54	217	1	0	0	0	2	1	0	0	0	D_0__Bacteria	D_1__Firmicutes	D_2__Clostridia	D_3__Clostridiales	D_4__Ruminococcaceae	D_5__Flavonifractor	D_6__
1373	0	0	0	0	0	0	0	0	1	0	0	0	0	0	0	0	5	15	81	1	0	0	0	0	0	0	0	0	D_0__Bacteria	D_1__Firmicutes	D_2__Clostridia	D_3__Clostridiales	D_4__Ruminococcaceae	D_5__	D_6__
1385	248	339	306	153	48	72	147	20	107	74	51	51	0	4	46	75	260	265	68	89	18	0	0	107	58	1	0	0	D_0__Bacteria	D_1__Bacteroidetes	D_2__Bacteroidia	D_3__Bacteroidales	D_4__Porphyromonadaceae	D_5__Parabacteroides	D_6__
1386	46	61	51	33	4	18	14	8	25	14	8	7	0	0	5	7	31	44	9	4	2	0	0	19	8	0	0	0	D_0__Bacteria	D_1__Bacteroidetes	D_2__Bacteroidia	D_3__Bacteroidales	D_4__Porphyromonadaceae	D_5__Parabacteroides	D_6__
1387	177	243	190	7	0	1	9	0	4	2	3	35	0	5	2	2	16	12	6	0	10	0	1	6	3	0	0	0	D_0__Bacteria	D_1__Bacteroidetes	D_2__Bacteroidia	D_3__Bacteroidales	D_4__Porphyromonadaceae	D_5__Parabacteroides	D_6__
1391	31	66	59	7	3	6	15	4	14	11	5	2	0	1	4	7	23	23	7	10	3	0	0	15	7	0	0	0	D_0__Bacteria	D_1__Bacteroidetes	D_2__Bacteroidia	D_3__Bacteroidales	D_4__Porphyromonadaceae	D_5__Parabacteroides	D_6__
1417	7	0	0	6	8	6	14	9	12	5	4	81	63	71	6	5	0	0	0	0	135	116	123	14	6	0	0	0	D_0__Bacteria	D_1__Proteobacteria	D_2__Gammaproteobacteria	D_3__Enterobacteriales	D_4__Enterobacteriaceae	D_5__Hafnia-Obesumbacterium	D_6__
1418	0	0	0	34	50	0	3	2	0	0	1	24	19	12	3	0	0	0	0	4	39	27	25	0	0	0	0	0	D_0__Bacteria	D_1__Proteobacteria	D_2__Gammaproteobacteria	D_3__Enterobacteriales	D_4__Enterobacteriaceae	D_5__Hafnia-Obesumbacterium	D_6__
1421	0	0	0	5	4	18	7	6	2	3	3	179	129	2	4	2	0	0	0	1	10	4	6	15	5	0	0	0	D_0__Bacteria	D_1__Proteobacteria	D_2__Gammaproteobacteria	D_3__Enterobacteriales	D_4__Enterobacteriaceae	D_5__Hafnia-Obesumbacterium	D_6__
1429	7	0	0	0	3	1	1	0	0	1	0	56	36	41	1	0	0	0	0	0	89	69	81	1	0	0	0	0	D_0__Bacteria	D_1__Proteobacteria	D_2__Gammaproteobacteria	D_3__Enterobacteriales	D_4__Enterobacteriaceae	D_5__Hafnia-Obesumbacterium	D_6__
1459	12	0	0	17	34	32	37	20	23	14	11	153	96	104	21	17	0	0	0	2	206	161	196	31	26	0	0	0	D_0__Bacteria	D_1__Proteobacteria	D_2__Gammaproteobacteria	D_3__Enterobacteriales	D_4__Enterobacteriaceae	D_5__Hafnia-Obesumbacterium	D_6__
1460	3	0	0	2	0	3	1	4	1	2	1	28	18	35	5	1	0	0	0	0	32	46	41	6	4	0	0	0	D_0__Bacteria	D_1__Proteobacteria	D_2__Gammaproteobacteria	D_3__Enterobacteriales	D_4__Enterobacteriaceae	D_5__Hafnia-Obesumbacterium	D_6__
1482	21	0	0	0	0	1	1	0	3	0	0	187	145	214	1	0	0	0	0	0	374	267	347	1	0	0	0	0	D_0__Bacteria	D_1__Proteobacteria	D_2__Gammaproteobacteria	D_3__Enterobacteriales	D_4__Enterobacteriaceae	D_5__Hafnia-Obesumbacterium	D_6__
1484	0	0	0	0	0	0	0	0	0	0	0	26	11	19	0	0	0	0	0	0	33	20	30	0	0	0	0	0	D_0__Bacteria	D_1__Proteobacteria	D_2__Gammaproteobacteria	D_3__Enterobacteriales	D_4__Enterobacteriaceae	D_5__Hafnia-Obesumbacterium	D_6__
1507	7	4	10	22	1	21	30	6	37	32	7	4	0	0	19	6	7	8	16	3	0	0	0	2	31	0	0	0	D_0__Bacteria	D_1__Bacteroidetes	D_2__Bacteroidia	D_3__Bacteroidales	D_4__Porphyromonadaceae	D_5__Parabacteroides	D_6__
1508	12	52	52	28	4	10	32	2	75	30	10	10	1	1	11	1	50	9	8	1	0	0	0	2	9	0	0	0	D_0__Bacteria	D_1__Bacteroidetes	D_2__Bacteroidia	D_3__Bacteroidales	D_4__Porphyromonadaceae	D_5__Parabacteroides	D_6__
1510	65	49	61	18	4	9	14	3	23	8	4	28	0	4	10	6	7	9	2	3	0	0	0	5	16	0	0	0	D_0__Bacteria	D_1__Bacteroidetes	D_2__Bacteroidia	D_3__Bacteroidales	D_4__Porphyromonadaceae	D_5__Parabacteroides	D_6__
1511	42	45	40	1	0	2	2	1	2	2	0	18	0	4	2	0	0	2	1	0	0	0	0	3	5	0	0	0	D_0__Bacteria	D_1__Bacteroidetes	D_2__Bacteroidia	D_3__Bacteroidales	D_4__Porphyromonadaceae	D_5__Parabacteroides	D_6__
1538	4	0	0	2	16	7	7	9	5	2	0	1	0	0	7	4	0	0	0	112	5	0	0	7	8	0	0	0	D_0__Bacteria	D_1__Firmicutes	D_2__Clostridia	D_3__Clostridiales	D_4__Lachnospiraceae	D_5__[Eubacterium] eligens group	D_6__
1539	1	0	0	8	4	16	11	4	18	9	0	2	0	0	9	9	0	0	0	204	5	0	0	10	10	0	0	0	D_0__Bacteria	D_1__Firmicutes	D_2__Clostridia	D_3__Clostridiales	D_4__Lachnospiraceae	D_5__[Eubacterium] eligens group	D_6__uncultured bacterium
1572	0	0	0	10	0	2	6	0	22	4	5	1	0	0	4	0	55	49	10	0	0	0	0	0	3	0	0	0	D_0__Bacteria	D_1__Bacteroidetes	D_2__Bacteroidia	D_3__Bacteroidales	D_4__Bacteroidaceae	D_5__Bacteroides	D_6__
1574	0	13	28	7	1	1	14	0	34	9	1	2	0	0	3	2	105	58	11	1	0	0	0	2	2	0	0	0	D_0__Bacteria	D_1__Bacteroidetes	D_2__Bacteroidia	D_3__Bacteroidales	D_4__Bacteroidaceae	D_5__Bacteroides	D_6__
1581	6	0	2	939	306	492	858	147	1141	414	573	463	1	19	393	435	2341	1931	672	188	117	2	6	547	520	0	0	0	D_0__Bacteria	D_1__Bacteroidetes	D_2__Bacteroidia	D_3__Bacteroidales	D_4__Bacteroidaceae	D_5__Bacteroides	D_6__uncultured bacterium
1583	0	0	0	10	0	7	12	1	29	7	13	27	0	1	10	12	44	32	9	5	8	0	0	11	6	0	0	0	D_0__Bacteria	D_1__Bacteroidetes	D_2__Bacteroidia	D_3__Bacteroidales	D_4__Bacteroidaceae	D_5__Bacteroides	D_6__
1610	6	0	0	3	0	4	3	3	1	5	6	20	32	63	4	1	0	0	0	1	37	88	107	4	2	0	0	0	D_0__Bacteria	D_1__Proteobacteria	D_2__Gammaproteobacteria	D_3__Enterobacteriales	D_4__Enterobacteriaceae	D_5__	D_6__
1611	7	0	0	10	9	17	18	10	5	11	22	28	47	113	14	9	0	0	0	1	83	132	203	19	12	0	0	0	D_0__Bacteria	D_1__Proteobacteria	D_2__Gammaproteobacteria	D_3__Enterobacteriales	D_4__Enterobacteriaceae	D_5__	D_6__
1614	2	0	0	11	11	1	1	2	0	0	0	2	7	18	0	1	0	0	0	1	19	20	17	1	1	0	0	0	D_0__Bacteria	D_1__Proteobacteria	D_2__Gammaproteobacteria	D_3__Enterobacteriales	D_4__Enterobacteriaceae	D_5__	D_6__
1619	3	0	0	0	1	0	0	0	0	0	0	22	15	40	0	1	0	0	0	0	30	56	58	0	0	0	0	0	D_0__Bacteria	D_1__Proteobacteria	D_2__Gammaproteobacteria	D_3__Enterobacteriales	D_4__Enterobacteriaceae	D_5__Serratia	D_6__
1643	86	0	0	4	9	2	2	9	0	0	0	21	0	0	3	1	0	0	0	0	131	0	0	4	0	0	0	0	D_0__Bacteria	D_1__Proteobacteria	D_2__Gammaproteobacteria	D_3__Alteromonadales	D_4__Shewanellaceae	D_5__Shewanella	D_6__
1644	6	0	0	0	0	2	0	0	3	0	120	3	1	0	1	1	0	0	0	0	0	0	3	1	0	0	0	0	D_0__Bacteria	D_1__Proteobacteria	D_2__Gammaproteobacteria	D_3__Enterobacteriales	D_4__Enterobacteriaceae	D_5__	D_6__
1665	0	0	0	9	5	11	9	8	33	6	40	22	16	26	32	68	1	1	1	0	1	0	0	3	6	22	11	21	D_0__Bacteria	D_1__Firmicutes	D_2__Bacilli	D_3__Lactobacillales	D_4__Enterococcaceae	D_5__Enterococcus	D_6__
1670	0	0	0	16	8	1	15	3	11	3	17	2	3	3	15	19	3	0	1	0	0	0	0	5	4	8	1	4	D_0__Bacteria	D_1__Firmicutes	D_2__Bacilli	D_3__Lactobacillales	D_4__Enterococcaceae	D_5__Enterococcus	D_6__
1705	4	0	0	9	1	2	2	14	2	0	53	4	44	68	0	0	29	23	6	0	1	0	0	0	2	45	64	129	D_0__Bacteria	D_1__Firmicutes	D_2__Clostridia	D_3__Clostridiales	D_4__Clostridiaceae 1	D_5__Clostridium sensu stricto 1	D_6__
1706	0	0	0	0	0	0	0	0	0	0	13	5	24	36	1	0	6	8	1	0	1	0	0	0	0	7	21	30	D_0__Bacteria	D_1__Firmicutes	D_2__Clostridia	D_3__Clostridiales	D_4__Clostridiaceae 1	D_5__Clostridium sensu stricto 1	D_6__
1738	0	0	0	3	0	4	1	0	0	4	1	2	0	0	1	37	86	41	144	3	0	0	0	3	1	0	0	0	D_0__Bacteria	D_1__Firmicutes	D_2__Clostridia	D_3__Clostridiales	D_4__Eubacteriaceae	D_5__Eubacterium	D_6__
1741	0	0	0	2	14	5	9	1	6	3	6	4	0	0	1	130	248	139	363	6	2	0	0	2	11	0	0	0	D_0__Bacteria	D_1__Firmicutes	D_2__Clostridia	D_3__Clostridiales	D_4__Eubacteriaceae	D_5__Eubacterium	D_6__
1742	0	0	0	0	4	1	5	0	2	3	0	0	0	0	0	34	62	40	109	2	0	0	0	0	4	0	0	0	D_0__Bacteria	D_1__Firmicutes	D_2__Clostridia	D_3__Clostridiales	D_4__Eubacteriaceae	D_5__Eubacterium	D_6__
1759	0	0	0	0	2	2	0	0	0	0	32	0	0	0	2	0	353	322	455	2	0	0	0	0	2	0	0	0	D_0__Bacteria	D_1__Firmicutes	D_2__Clostridia	D_3__Clostridiales	D_4__Lachnospiraceae	D_5__Lachnoclostridium	D_6__
1760	0	0	0	0	0	2	0	0	0	0	10	0	0	0	0	1	80	122	172	1	0	0	0	0	3	0	0	0	D_0__Bacteria	D_1__Firmicutes	D_2__Clostridia	D_3__Clostridiales	D_4__Lachnospiraceae	D_5__Lachnoclostridium	D_6__
1784	451	1	433	774	235	444	742	185	835	445	52	403	20	58	158	125	306	326	62	110	4	0	0	457	347	0	0	1	D_0__Bacteria	D_1__Bacteroidetes	D_2__Bacteroidia	D_3__Bacteroidales	D_4__Bacteroidaceae	D_5__Bacteroides	D_6__
1786	26	0	30	7	3	7	16	1	20	9	1	26	0	1	4	0	4	7	1	1	0	0	0	8	5	0	0	0	D_0__Bacteria	D_1__Bacteroidetes	D_2__Bacteroidia	D_3__Bacteroidales	D_4__Bacteroidaceae	D_5__Bacteroides	D_6__
1805	0	0	0	74	27	66	124	40	128	38	0	112	0	3	67	61	12	4	1	11	57	0	0	129	92	0	0	0	D_0__Bacteria	D_1__Bacteroidetes	D_2__Bacteroidia	D_3__Bacteroidales	D_4__Bacteroidaceae	D_5__Bacteroides	D_6__
1806	14	0	0	15	4	23	18	2	54	5	189	16	0	0	22	46	229	270	254	45	15	0	0	26	16	0	0	0	D_0__Bacteria	D_1__Bacteroidetes	D_2__Bacteroidia	D_3__Bacteroidales	D_4__Bacteroidaceae	D_5__Bacteroides	D_6__
1807	0	0	0	25	69	23	46	86	47	37	4	4	0	0	3	2	88	71	26	43	1	0	0	10	0	0	0	0	D_0__Bacteria	D_1__Bacteroidetes	D_2__Bacteroidia	D_3__Bacteroidales	D_4__Bacteroidaceae	D_5__Bacteroides	D_6__
1808	131	0	194	78	44	42	93	15	104	44	15	67	0	1	33	12	2	1	1	10	0	0	0	112	94	0	0	0	D_0__Bacteria	D_1__Bacteroidetes	D_2__Bacteroidia	D_3__Bacteroidales	D_4__Bacteroidaceae	D_5__Bacteroides	D_6__uncultured bacterium
1841	0	0	0	15	34	4	4	97	15	9	10	69	1	8	2	0	54	36	101	25	0	0	0	1	4	401	135	71	D_0__Bacteria	D_1__Firmicutes	D_2__Clostridia	D_3__Clostridiales	D_4__Lachnospiraceae	D_5__[Ruminococcus] torques group	D_6__
1876	4	0	0	0	6	6	4	1	7	0	0	0	0	0	0	1	2	2	8	67	1	0	0	1	1	0	0	0	D_0__Bacteria	D_1__Firmicutes	D_2__Clostridia	D_3__Clostridiales	D_4__Lachnospiraceae	D_5__Fusicatenibacter	D_6__uncultured bacterium
1879	1	0	0	3	3	4	2	0	4	2	0	1	0	0	9	5	0	0	0	110	0	0	0	4	1	0	0	0	D_0__Bacteria	D_1__Firmicutes	D_2__Clostridia	D_3__Clostridiales	D_4__Lachnospiraceae	D_5__Lachnospiraceae NK4A136 group	D_6__uncultured bacterium
1896	19	0	0	7	17	16	20	10	26	11	0	14	0	0	31	16	0	0	0	871	34	0	0	16	12	0	0	0	D_0__Bacteria	D_1__Firmicutes	D_2__Clostridia	D_3__Clostridiales	D_4__Ruminococcaceae	D_5__Faecalibacterium	D_6__uncultured bacterium
1897	6	0	0	2	10	9	16	2	4	8	0	5	0	0	24	7	2	0	0	334	10	0	0	7	7	0	0	0	D_0__Bacteria	D_1__Firmicutes	D_2__Clostridia	D_3__Clostridiales	D_4__Ruminococcaceae	D_5__Faecalibacterium	D_6__uncultured bacterium
1919	2	0	0	111	166	88	115	452	121	60	32	11	0	1	5	5	11	11	10	17	4	0	0	9	13	0	0	0	D_0__Bacteria	D_1__Bacteroidetes	D_2__Bacteroidia	D_3__Bacteroidales	D_4__Rikenellaceae	D_5__Alistipes	D_6__uncultured bacterium
1920	0	0	0	4	139	11	13	110	43	20	5	0	0	0	9	1	12	6	6	11	0	0	0	90	137	2	0	0	D_0__Bacteria	D_1__Bacteroidetes	D_2__Bacteroidia	D_3__Bacteroidales	D_4__Rikenellaceae	D_5__Alistipes	D_6__
1938	17	0	0	23	60	73	42	26	60	27	0	11	0	0	39	6	2	2	0	863	39	0	0	60	22	0	0	0	D_0__Bacteria	D_1__Firmicutes	D_2__Clostridia	D_3__Clostridiales	D_4__Lachnospiraceae	D_5__[Eubacterium] rectale group	D_6__uncultured bacterium
1940	4	0	0	7	10	7	5	6	8	1	0	0	0	0	7	2	0	0	0	187	3	0	0	3	2	0	0	0	D_0__Bacteria	D_1__Firmicutes	D_2__Clostridia	D_3__Clostridiales	D_4__Lachnospiraceae	D_5__	D_6__
1964	1	0	0	51	18	40	56	143	67	19	1	14	0	0	13	20	0	0	0	30	0	0	0	33	52	0	0	0	D_0__Bacteria	D_1__Bacteroidetes	D_2__Bacteroidia	D_3__Bacteroidales	D_4__Porphyromonadaceae	D_5__Barnesiella	D_6__
1965	0	0	0	20	7	19	12	56	44	14	3	2	0	0	4	4	0	0	2	9	0	0	0	17	17	0	0	0	D_0__Bacteria	D_1__Bacteroidetes	D_2__Bacteroidia	D_3__Bacteroidales	D_4__Porphyromonadaceae	D_5__Barnesiella	D_6__
1979	0	0	0	23	8	8	12	51	45	5	1	4	0	0	5	2	0	1	0	13	0	0	0	14	13	0	0	0	D_0__Bacteria	D_1__Bacteroidetes	D_2__Bacteroidia	D_3__Bacteroidales	D_4__Porphyromonadaceae	D_5__Barnesiella	D_6__
1980	0	0	0	17	11	11	32	78	31	9	3	8	0	0	6	14	0	0	0	7	0	0	0	22	19	0	0	0	D_0__Bacteria	D_1__Bacteroidetes	D_2__Bacteroidia	D_3__Bacteroidales	D_4__Porphyromonadaceae	D_5__Barnesiella	D_6__
1990	477	1583	1673	969	202	550	943	207	1229	574	267	539	11	113	418	420	1845	1551	748	187	9	0	0	759	402	5	2	4	D_0__Bacteria	D_1__Bacteroidetes	D_2__Bacteroidia	D_3__Bacteroidales	D_4__Bacteroidaceae	D_5__Bacteroides	D_6__uncultured organism
1993	3	2	6	15	1	7	24	9	24	11	2	10	0	0	11	6	10	18	3	1	0	0	0	6	4	0	0	0	D_0__Bacteria	D_1__Bacteroidetes	D_2__Bacteroidia	D_3__Bacteroidales	D_4__Bacteroidaceae	D_5__Bacteroides	D_6__
2012	4	0	0	4	6	7	14	7	10	4	5	45	19	55	7	3	0	0	0	0	100	78	74	1	5	0	0	0	D_0__Bacteria	D_1__Proteobacteria	D_2__Gammaproteobacteria	D_3__Enterobacteriales	D_4__Enterobacteriaceae	D_5__Hafnia-Obesumbacterium	D_6__
2016	0	0	0	14	21	16	23	12	24	11	6	1	2	3	7	8	0	0	0	2	3	1	3	17	17	0	0	0	D_0__Bacteria	D_1__Proteobacteria	D_2__Gammaproteobacteria	D_3__Enterobacteriales	D_4__Enterobacteriaceae	D_5__Hafnia-Obesumbacterium	D_6__
2017	7	0	0	0	0	2	0	1	0	0	0	46	22	41	0	0	0	0	0	0	58	53	64	0	1	0	0	0	D_0__Bacteria	D_1__Proteobacteria	D_2__Gammaproteobacteria	D_3__Enterobacteriales	D_4__Enterobacteriaceae	D_5__Hafnia-Obesumbacterium	D_6__
2024	0	0	0	16	27	9	17	10	10	10	10	2	2	2	11	6	0	0	0	1	8	2	2	16	16	0	0	0	D_0__Bacteria	D_1__Proteobacteria	D_2__Gammaproteobacteria	D_3__Enterobacteriales	D_4__Enterobacteriaceae	D_5__Hafnia-Obesumbacterium	D_6__
2043	1214	900	1171	1074	184	847	1025	331	1176	813	558	557	6	73	521	490	637	519	410	116	3	0	0	448	1043	1	0	0	D_0__Bacteria	D_1__Bacteroidetes	D_2__Bacteroidia	D_3__Bacteroidales	D_4__Porphyromonadaceae	D_5__Parabacteroides	D_6__
2048	2	0	0	18	0	7	42	10	30	16	3	2	0	3	4	10	12	11	5	2	0	0	0	3	10	0	0	0	D_0__Bacteria	D_1__Bacteroidetes	D_2__Bacteroidia	D_3__Bacteroidales	D_4__Porphyromonadaceae	D_5__Parabacteroides	D_6__
2065	123	0	0	831	610	755	1159	837	785	719	1118	591	780	1971	704	519	0	14	0	64	1245	2614	3125	832	684	0	0	0	D_0__Bacteria	D_1__Proteobacteria	D_2__Gammaproteobacteria	D_3__Enterobacteriales	D_4__Enterobacteriaceae	D_5__	D_6__
2072	0	0	0	0	1	0	0	0	0	0	0	13	18	21	0	0	0	0	0	0	17	26	45	0	0	0	0	0	D_0__Bacteria	D_1__Proteobacteria	D_2__Gammaproteobacteria	D_3__Enterobacteriales	D_4__Enterobacteriaceae	D_5__	D_6__
2077	0	0	0	0	0	0	3	2	1	2	0	43	50	4	2	0	0	0	0	0	2	4	4	4	0	0	0	0	D_0__Bacteria	D_1__Proteobacteria	D_2__Gammaproteobacteria	D_3__Enterobacteriales	D_4__Enterobacteriaceae	D_5__	D_6__
2085	0	0	0	8	20	8	10	2	9	4	22	5	0	0	18	25	1	1	0	1	0	0	0	1	4	24	14	20	D_0__Bacteria	D_1__Firmicutes	D_2__Bacilli	D_3__Lactobacillales	D_4__Enterococcaceae	D_5__Enterococcus	D_6__
2086	2	0	0	1046	779	552	694	388	1858	262	2324	389	320	538	2199	4966	166	104	143	28	17	0	0	433	396	1539	945	1052	D_0__Bacteria	D_1__Firmicutes	D_2__Bacilli	D_3__Lactobacillales	D_4__Enterococcaceae	D_5__Enterococcus	D_6__
2113	1	0	0	8	2	1	1	3	1	0	21	2	19	25	1	1	10	3	2	0	0	0	0	0	4	20	15	26	D_0__Bacteria	D_1__Firmicutes	D_2__Clostridia	D_3__Clostridiales	D_4__Clostridiaceae 1	D_5__Clostridium sensu stricto 1	D_6__
2138	0	0	0	36	23	53	66	6	66	40	22	29	0	0	47	67	46	36	24	14	14	0	0	72	95	0	0	0	D_0__Bacteria	D_1__Bacteroidetes	D_2__Bacteroidia	D_3__Bacteroidales	D_4__Bacteroidaceae	D_5__Bacteroides	D_6__
2139	0	1	1	15	0	10	11	9	45	11	2	5	0	0	11	11	7	2	4	3	7	0	0	5	11	0	0	0	D_0__Bacteria	D_1__Bacteroidetes	D_2__Bacteroidia	D_3__Bacteroidales	D_4__Bacteroidaceae	D_5__Bacteroides	D_6__
2155	10	0	0	136	475	66	165	894	156	77	66	459	1	40	29	10	365	337	754	278	4	0	0	24	21	3502	1290	892	D_0__Bacteria	D_1__Firmicutes	D_2__Clostridia	D_3__Clostridiales	D_4__Lachnospiraceae	D_5__[Ruminococcus] torques group	D_6__uncultured bacterium
2157	0	0	0	3	3	2	4	7	3	3	0	3	0	0	1	0	0	2	32	21	0	0	0	2	0	44	6	8	D_0__Bacteria	D_1__Firmicutes	D_2__Clostridia	D_3__Clostridiales	D_4__Lachnospiraceae	D_5__[Ruminococcus] torques group	D_6__
2160	1	0	0	7	10	1	3	13	4	2	2	27	0	5	0	0	7	11	17	3	0	0	0	1	0	44	18	18	D_0__Bacteria	D_1__Firmicutes	D_2__Clostridia	D_3__Clostridiales	D_4__Lachnospiraceae	D_5__[Ruminococcus] torques group	D_6__
2180	1	0	0	1	1	1	1	1	3	5	1	16	6	10	1	1	0	0	0	0	21	19	17	3	2	0	0	0	D_0__Bacteria	D_1__Proteobacteria	D_2__Gammaproteobacteria	D_3__Enterobacteriales	D_4__Enterobacteriaceae	D_5__Hafnia-Obesumbacterium	D_6__
2181	1	0	0	16	23	3	25	10	9	9	6	4	2	4	6	10	0	0	0	1	7	10	8	12	14	0	0	0	D_0__Bacteria	D_1__Proteobacteria	D_2__Gammaproteobacteria	D_3__Enterobacteriales	D_4__Enterobacteriaceae	D_5__Hafnia-Obesumbacterium	D_6__
2182	0	0	0	16	13	16	11	8	9	9	2	2	2	3	13	5	0	0	0	0	9	6	9	11	17	0	0	0	D_0__Bacteria	D_1__Proteobacteria	D_2__Gammaproteobacteria	D_3__Enterobacteriales	D_4__Enterobacteriaceae	D_5__Hafnia-Obesumbacterium	D_6__
2187	0	0	0	39	58	6	13	8	12	6	3	2	2	1	5	3	0	0	0	4	8	5	7	8	6	0	0	0	D_0__Bacteria	D_1__Proteobacteria	D_2__Gammaproteobacteria	D_3__Enterobacteriales	D_4__Enterobacteriaceae	D_5__Hafnia-Obesumbacterium	D_6__
2207	10	0	0	484	133	82	78	297	125	25	2865	44	519	1146	38	26	1331	1104	609	2	20	0	0	66	129	2642	4261	6841	D_0__Bacteria	D_1__Firmicutes	D_2__Clostridia	D_3__Clostridiales	D_4__Clostridiaceae 1	D_5__Clostridium sensu stricto 1	D_6__
2209	1	0	0	0	0	1	0	1	0	0	0	2	30	53	0	0	2	1	1	0	0	0	0	0	0	1	3	3	D_0__Bacteria	D_1__Firmicutes	D_2__Clostridia	D_3__Clostridiales	D_4__Clostridiaceae 1	D_5__Clostridium sensu stricto 1	D_6__
2216	201	0	0	2521	3353	2303	3327	2228	2650	1933	1312	2406	1545	2430	2380	1492	0	4	0	127	4139	3346	3769	3102	2661	0	0	0	D_0__Bacteria	D_1__Proteobacteria	D_2__Gammaproteobacteria	D_3__Enterobacteriales	D_4__Enterobacteriaceae	D_5__Hafnia-Obesumbacterium	D_6__
2217	1	0	0	11	11	11	6	3	8	3	8	9	5	8	8	3	0	0	0	0	21	11	12	13	14	0	0	0	D_0__Bacteria	D_1__Proteobacteria	D_2__Gammaproteobacteria	D_3__Enterobacteriales	D_4__Enterobacteriaceae	D_5__Hafnia-Obesumbacterium	D_6__
2218	0	0	0	7	14	7	9	5	4	2	2	7	3	6	6	3	0	0	0	0	7	3	5	7	12	0	0	0	D_0__Bacteria	D_1__Proteobacteria	D_2__Gammaproteobacteria	D_3__Enterobacteriales	D_4__Enterobacteriaceae	D_5__Hafnia-Obesumbacterium	D_6__
2219	4	0	0	7	19	11	10	6	10	8	7	7	5	10	8	1	0	0	0	0	24	15	11	11	8	0	0	0	D_0__Bacteria	D_1__Proteobacteria	D_2__Gammaproteobacteria	D_3__Enterobacteriales	D_4__Enterobacteriaceae	D_5__Hafnia-Obesumbacterium	D_6__

## Sheet: ASV_Filtered_Percent_Matrix
samples	AMP_DROPL_1D1	AMP_PLATE_3D1	AMP_PLATE_3D2	BHIS_DROPL_1D1	BHIS_DROPL_1D1_SORTED	BHIS_DROPL_1D2	BHIS_DROPL_1D3	BHIS_DROPL_1D3_SORTED	BHIS_DROPL_2D2	BHIS_DROPL_2D3	BHIS_PLATED_3D	CIPRO_DROPL_1D1	CIPRO_PLATE_3D1	CIPRO_PLATE_3D2	GMM_DROPL_1D	GMM_DROPL_2D	GMM_PLATE_3D1	GMM_PLATE_3D2	GMM_PLATE_7D	RAW_STOOL	VANCO_DROPL_1D1	VANCO_PLATE_3D1	VANCO_PLATE_3D2	YCFA_DROPL_1D	YCFA_DROPL_2D	YCFA_PLATE_3D1	YCFA_PLATE_3D2	YCFA_PLATE_7D	Kingdom	Phylum	Class	Order	Family	Genus	Species
1	0	0	0	0.00149526	0.00870594	0.00365408	0.00264275	0.00507566	0.00223471	0.000687285	0	0	0	0	0.00351195	0.00125434	0	0	0	0.00519719	0	0	0	0.0472045	0.0670491	0	0	0	D_0__Bacteria	D_1__Bacteroidetes	D_2__Bacteroidia	D_3__Bacteroidales	D_4__Prevotellaceae	D_5__Paraprevotella	D_6__uncultured bacterium
3	0	0	0	0.00606413	0.0684642	0.00621194	0.00264275	0.00258571	0.00325049	0.00494845	0	0.00140952	0	0	0.0030588	0.00212273	0	0	0	0.00784673	0	0	0	0.01006	0.00731804	0	0	0	D_0__Bacteria	D_1__Firmicutes	D_2__Clostridia	D_3__Clostridiales	D_4__Ruminococcaceae	D_5__Ruminococcaceae UCG-013	D_6__uncultured bacterium
9	0	0	0	0	0.000338095	0	0	0.00105344	6.77186e-05	0.000549828	0	0	0	0	0	0	0.00109016	0.000947493	0.00831056	0	0	0	0	0.000193461	0.000692247	0	0	0	D_0__Bacteria	D_1__Firmicutes	D_2__Clostridia	D_3__Clostridiales	D_4__Lachnospiraceae	D_5__[Eubacterium] hallii group	D_6__uncultured bacterium
12	0.00225169	0	0	0	0	0	0	0	0	0	0	0	0	0	0	0	0	0	0	0.015082	0	0	0	0	0	0	0	0	D_0__Bacteria	D_1__Bacteroidetes	D_2__Bacteroidia	D_3__Bacteroidales	D_4__Prevotellaceae	D_5__Prevotella 2	D_6__uncultured bacterium
19	0.000500375	0	0	0.00764247	0.0399797	0.00389769	0.00704733	0.147769	0.00799079	0.00714777	0	0.00542123	0	0.000561482	0.00385182	0.00125434	0.003527	0.00418476	0.00295993	0.00264955	0	0	0	0.0115109	0.00761472	0.0245694	0.017929	0.046604	D_0__Bacteria	D_1__Actinobacteria	D_2__Coriobacteriia	D_3__Coriobacteriales	D_4__Coriobacteriaceae	D_5__Collinsella	D_6__uncultured bacterium
22	0.0195146	0	0	0	0.00118333	0.000121803	0	0.000957671	0.000203156	0	0	0.00260219	0	0	0.000566444	0	0	0	0	0.000101906	0.0164374	0	0	0.000386922	0	0	0	0	D_0__Bacteria	D_1__Proteobacteria	D_2__Gammaproteobacteria	D_3__Pseudomonadales	D_4__Pseudomonadaceae	D_5__Pseudomonas	D_6__
23	0	0	0	0	0	0	8.00833e-05	0	0	0	0	0.000216849	0	0	0	0	0.00468129	0.00347414	0.00717213	0	0	0	0	0	0	0	0	0	D_0__Bacteria	D_1__Firmicutes	D_2__Clostridia	D_3__Clostridiales	D_4__Lachnospiraceae	D_5__Lachnoclostridium	D_6__
24	0	0	0	0	0	0	0	0	0	0	0	0	0	0	0	0	0	0	0	0.0111077	0	0	0	0	0	0	0	0	D_0__Bacteria	D_1__Firmicutes	D_2__Clostridia	D_3__Clostridiales	D_4__Lachnospiraceae	D_5__Lachnospira	D_6__
25	0.00350263	0	0	0.00116298	0.000422619	0.000365408	0.000800833	0.00220264	0.00135437	0.00178694	0	0.000542123	0	0	0	0.000385951	0	0.000236873	0.000113843	0.000509528	0	0	0	0	0.00039557	0	0	0	D_0__Bacteria	D_1__Bacteroidetes	D_2__Bacteroidia	D_3__Bacteroidales	D_4__Porphyromonadaceae	D_5__Butyricimonas	D_6__
27	0	0	0	0	0	0	0	0	0.00277646	0	0	0	0	0	0	0	0	0	0	0.0544176	0	0	0	0	0	0	0	0	D_0__Bacteria	D_1__Firmicutes	D_2__Clostridia	D_3__Clostridiales	D_4__Ruminococcaceae	D_5__Ruminiclostridium 6	D_6__uncultured bacterium
43	0.000250188	0	0	0.00290746	0.00278928	0.00158343	0.006727	0.00239418	0.00318277	0.00549828	0.000402901	0.00466226	0.0106986	0.0129141	0.00385182	0.00106137	0	0	0	0	0.00584439	0.0289252	0.0226771	0.00203134	0.00108782	0	0	0	D_0__Bacteria	D_1__Proteobacteria	D_2__Gammaproteobacteria	D_3__Enterobacteriales	D_4__Enterobacteriaceae	D_5__	D_6__
44	0	0	0	0.000415351	0.000253571	0.000365408	8.00833e-05	0.000191534	6.77186e-05	0.000412371	0.000322321	0.000758972	0.00251731	0.00393038	0.000679733	0.000192976	0	0	0	0.000101906	0.00243516	0.00551491	0.0056191	0	0.000197785	0	0	0	D_0__Bacteria	D_1__Proteobacteria	D_2__Gammaproteobacteria	D_3__Enterobacteriales	D_4__Enterobacteriaceae	D_5__	D_6__
47	0	0	0	0	0	0	0	0	0	0	0	0	0	0	0	0	0	0	0	0.0175278	0	0	0	0	0	0	0	0	D_0__Bacteria	D_1__Firmicutes	D_2__Clostridia	D_3__Clostridiales	D_4__Lachnospiraceae	D_5__Roseburia	D_6__
49	0	0	0	0	0	0	0	0	0	0	0	0	0	0	0	0	0	0.00821161	0.00170765	0.00346479	0	0	0	0	0	0	0	0	D_0__Bacteria	D_1__Firmicutes	D_2__Clostridia	D_3__Clostridiales	D_4__Lachnospiraceae	D_5__Roseburia	D_6__uncultured bacterium
52	0.000250188	0	0	0.00207676	0.0211309	0.00158343	0.00176183	0.00220264	0.0029119	0.00302405	0	0	0	0	0.000679733	0.00164029	0	0	0	0.000815245	0	0	0	0.00106404	0.00593354	0	0	0	D_0__Bacteria	D_1__Bacteroidetes	D_2__Bacteroidia	D_3__Bacteroidales	D_4__Rikenellaceae	D_5__Alistipes	D_6__
57	0	0	0	0.000415351	0.00109881	0	0.000880916	0.000383068	0.000880341	0	8.05802e-05	0	0	0	0	0	0.00102604	0.00134228	0.00443989	0.00315907	0.000974066	0	0	0	0.000890032	0	0	0	D_0__Bacteria	D_1__Firmicutes	D_2__Clostridia	D_3__Clostridiales	D_4__Ruminococcaceae	D_5__	D_6__
67	0	0	0	0	0	0	0	0	0.000880341	0	0	0.000542123	0	0	0	0	0.00410414	0.00592183	0.00512295	0.0101906	0	0	0	0	0	0	0	0	D_0__Bacteria	D_1__Firmicutes	D_2__Clostridia	D_3__Clostridiales	D_4__Lachnospiraceae	D_5__Blautia	D_6__
75	0.000750563	0	0	0.000747632	0.00101428	0.000730816	0.000320333	0.000478835	0.000812623	0	8.05802e-05	0.00238534	0.00671282	0.00404267	0.000453155	0.000675415	0	0	0	0.000101906	0.00681846	0.00585256	0.00451535	0.000290192	0.000791139	0	0	0	D_0__Bacteria	D_1__Proteobacteria	D_2__Gammaproteobacteria	D_3__Enterobacteriales	D_4__Enterobacteriaceae	D_5__Hafnia-Obesumbacterium	D_6__
263	0.0182637	0.0593865	0.0444806	0.0116298	0.00397261	0.0123021	0.0106511	0.00248994	0.0126634	0.0127835	0.00314263	0.00910767	0.000839102	0.00123526	0.00860995	0.00742956	0.0167372	0.0201342	0.0128643	0.00295526	0	0	0	0.0139292	0.00474684	0.000181324	0.000114929	0	D_0__Bacteria	D_1__Bacteroidetes	D_2__Bacteroidia	D_3__Bacteroidales	D_4__Bacteroidaceae	D_5__Bacteroides	D_6__
268	0	0	0	0.00116298	0	0.000365408	0.00112117	9.57671e-05	0.00162525	0.00137457	0.000322321	0.000975821	0	0	0.000679733	0.000192976	0.00609209	0.00371101	0.00204918	0.000203811	0	0	0	0.000483653	9.88924e-05	0	0	0	D_0__Bacteria	D_1__Bacteroidetes	D_2__Bacteroidia	D_3__Bacteroidales	D_4__Bacteroidaceae	D_5__Bacteroides	D_6__
270	0.00625469	0	0.000886656	0.00323974	0	0.00231425	0.00216225	0.00191534	0.00318277	0.00178694	0	0.00292746	0	0	0.00260564	0.000964878	0.00128254	0.0015002	0.00159381	0.0035667	0	0	0	0.00483653	0.00197785	0	0	0	D_0__Bacteria	D_1__Bacteroidetes	D_2__Bacteroidia	D_3__Bacteroidales	D_4__Bacteroidaceae	D_5__Bacteroides	D_6__
271	0	0	0	0.000498422	0	0	0.000560583	9.57671e-05	0.00169296	0.000962199	8.05802e-05	0.000325274	0	0.000112296	0.000113289	0.000482439	0.00532256	0.00307935	0.00136612	0.000101906	0	0	0	0.000193461	0	0	0	0	D_0__Bacteria	D_1__Bacteroidetes	D_2__Bacteroidia	D_3__Bacteroidales	D_4__Bacteroidaceae	D_5__Bacteroides	D_6__
314	0	0	0	0.0104669	0.0436988	0.0137637	0.00800833	0.00593756	0.0142886	0.00879725	0	0	0	0	0.00962955	0.00357005	0	0	0	0.113523	0	0	0	0.0357903	0.0227453	0	0	0	D_0__Bacteria	D_1__Firmicutes	D_2__Clostridia	D_3__Clostridiales	D_4__Ruminococcaceae	D_5__Ruminococcus 2	D_6__uncultured bacterium
371	0.000250188	0	0	0.00672869	0.0110726	0.0124239	0.0131337	0.0108217	0.00758448	0.00907216	0.00556003	0.00357801	0.00251731	0.00415497	0.0149541	0.00849093	0	0	0	0.000407623	0.00608791	0.00495217	0.00431467	0.0120913	0.0102848	0	0	0	D_0__Bacteria	D_1__Proteobacteria	D_2__Gammaproteobacteria	D_3__Enterobacteriales	D_4__Enterobacteriaceae	D_5__Hafnia-Obesumbacterium	D_6__
374	0	0	0	0.000166141	0.000422619	0.00718636	0.00800833	0.00584179	0.00419855	0.00742268	0.00338437	0	0.000209776	0	0.00691062	0.00414898	0	0	0	0	0	0.000225098	0.000100341	0.00667441	0.00593354	0	0	0	D_0__Bacteria	D_1__Proteobacteria	D_2__Gammaproteobacteria	D_3__Enterobacteriales	D_4__Enterobacteriaceae	D_5__Hafnia-Obesumbacterium	D_6__
375	0.00300225	0	0	0.0206014	0.0297523	0.00718636	0.00960999	0.006991	0.00575608	0.00494845	0.00290089	0.0109509	0.0161527	0.00909601	0.00928968	0.00482439	0	0	0	0.00142668	0.0214294	0.0151941	0.0142484	0.00532018	0.0090981	0	0	0	D_0__Bacteria	D_1__Proteobacteria	D_2__Gammaproteobacteria	D_3__Enterobacteriales	D_4__Enterobacteriaceae	D_5__Hafnia-Obesumbacterium	D_6__
417	0	0	0	0.000415351	0.00431071	0.000609013	0.0014415	0.00296878	0.000541748	0.000687285	0	0.00520438	0.00902035	0.00168445	0.0132548	0.00540332	0	0	0	0.00346479	0	0	0	0.000483653	0	0	0	0	D_0__Bacteria	D_1__Firmicutes	D_2__Bacilli	D_3__Lactobacillales	D_4__Carnobacteriaceae	D_5__Carnobacterium	D_6__
419	0	0	0	0	0	0	0	0	0	0	0.0252216	0	0	0	0	0	0	0	0	0	0	0	0	0	0.000791139	0.000543971	0.000344788	8.63036e-05	D_0__Bacteria	D_1__Firmicutes	D_2__Clostridia	D_3__Clostridiales	D_4__Peptostreptococcaceae	D_5__	D_6__
454	0	0	0	0.000249211	0.00490238	0.000730816	0	0.000287301	0.000270874	0.000412371	8.05802e-05	0.000433698	0	0	0	0	0.000128254	7.89578e-05	0	0.0017324	0	0	0	0.000290192	0.000692247	0.0838622	0.0719458	0.0122551	D_0__Bacteria	D_1__Firmicutes	D_2__Bacilli	D_3__Lactobacillales	D_4__Streptococcaceae	D_5__Streptococcus	D_6__
455	0	0	0	0.00141219	0.00312738	0	0.00216225	0	0.00893885	0	0.0141015	0	0	0	0	0.00665766	0.019174	0.0108172	0.0423497	0.0122287	0	0.00326393	0.00391331	0	0	0	0	0	D_0__Bacteria	D_1__Firmicutes	D_2__Negativicutes	D_3__Selenomonadales	D_4__Acidaminococcaceae	D_5__Phascolarctobacterium	D_6__uncultured bacterium
456	0	0	0	0.0061472	0.0327952	0.00231425	0.000960999	0.00287301	0.00663642	0.0107216	0	0.000650548	0	0	0	0.000385951	0	0	0	0.000815245	0	0	0	0.0012575	0.0139438	0	0	0	D_0__Bacteria	D_1__Bacteroidetes	D_2__Bacteroidia	D_3__Bacteroidales	D_4__Rikenellaceae	D_5__Alistipes	D_6__
509	0	0	0	0.00971922	0.00245119	0.009257	0.0172179	0.00890634	0.0293899	0.0112715	0.00781628	0.0442372	0	0.00213363	0.00385182	0.00424547	0.0554059	0.0341098	0.024704	0.00988485	0	0	0	0.0154769	0.0181962	0.000634633	0.000689576	0.00155347	D_0__Bacteria	D_1__Firmicutes	D_2__Clostridia	D_3__Clostridiales	D_4__Lachnospiraceae	D_5__	D_6__
510	0.00175131	0	0	0.00589799	0.00135238	0.0043849	0.00880916	0.00517142	0.0172005	0.00701031	0.00596293	0.0267809	0	0.00134756	0.00181262	0.00279815	0.0310376	0.0179234	0.015255	0.005401	0	0	0	0.00686787	0.0108782	0.00108794	0.000459717	0.000517822	D_0__Bacteria	D_1__Firmicutes	D_2__Clostridia	D_3__Clostridiales	D_4__Lachnospiraceae	D_5__	D_6__
546	0	0	0	0.00166141	0.000422619	0.00182704	0.00136142	0.000478835	0.000677186	0.00206186	0.000322321	0.000325274	0	0	0.00113289	0.000771903	0.000256509	0.000473747	0.000455373	0.000611434	0	0	0	0.00241826	0.000593354	0	0	8.63036e-05	D_0__Bacteria	D_1__Bacteroidetes	D_2__Bacteroidia	D_3__Bacteroidales	D_4__Bacteroidaceae	D_5__Bacteroides	D_6__
547	0	0	0	8.30703e-05	0.000169047	0.000243605	0	0	0.000203156	0	0.00338437	0	0	0	0	0	0.00262922	0.00378997	0	0	0	0	0	0	9.88924e-05	0	0	0	D_0__Bacteria	D_1__Firmicutes	D_2__Clostridia	D_3__Clostridiales	D_4__Lachnospiraceae	D_5__[Eubacterium] fissicatena group	D_6__
623	0.00500375	0	0	0.00731018	0.00312738	0.00377588	0.00560583	0.0165677	0.0113767	0.00756014	0	0.000433698	0.000419551	0	0.0020392	0.000675415	0.000192382	0.000157916	0	0.000815245	0.00267868	0	0	0.00831882	0.0090981	0	0	0	D_0__Bacteria	D_1__Bacteroidetes	D_2__Bacteroidia	D_3__Bacteroidales	D_4__Porphyromonadaceae	D_5__Odoribacter	D_6__
626	0.00225169	0	0	0.00265825	0.000507142	0.000487211	0.00184192	0.00584179	0.00487574	0.00302405	0	0.000216849	0	0	0.0010196	0.000578927	0.000192382	0.000157916	0	0.000611434	0.000730549	0	0	0.00212807	0.00326345	0	0	0	D_0__Bacteria	D_1__Bacteroidetes	D_2__Bacteroidia	D_3__Bacteroidales	D_4__Porphyromonadaceae	D_5__Odoribacter	D_6__
665	0.000750563	0	0	0.00282439	0.00169047	0.000609013	0.00376391	0.00181957	0.00264102	0.004811	0.000644641	0.00368644	0.0125865	0.00797305	0.00249235	0.000578927	0	0	0	0	0.00389626	0.0177828	0.0197672	0.00154769	0.000988924	0	0	0	D_0__Bacteria	D_1__Proteobacteria	D_2__Gammaproteobacteria	D_3__Enterobacteriales	D_4__Enterobacteriaceae	D_5__Hafnia-Obesumbacterium	D_6__
666	0.000750563	0	0	0.000996843	0.00228214	0.00133983	0.00312325	0.000766137	0.000880341	0.00137457	0.00112812	0.000650548	0.00146843	0.00145985	0.0020392	0.000964878	0	0	0	0.000101906	0.00219165	0.00202589	0.00110375	0.00290192	0.00187896	0	0	0	D_0__Bacteria	D_1__Proteobacteria	D_2__Gammaproteobacteria	D_3__Enterobacteriales	D_4__Enterobacteriaceae	D_5__Hafnia-Obesumbacterium	D_6__
699	0	0	0.000443328	0.00415351	0.00287381	0.00207065	0.00408425	0.00239418	0.00568836	0.00316151	0.069299	0.00368644	0	0	0.00249235	0.00173678	0.121521	0.123648	0.0967668	0.005401	0	0	0	0.00532018	0.00474684	0	0	0	D_0__Bacteria	D_1__Bacteroidetes	D_2__Bacteroidia	D_3__Bacteroidales	D_4__Bacteroidaceae	D_5__Bacteroides	D_6__
733	0	0	0	0.00257518	0.017919	0.00121803	0.00120125	0.000287301	0.00514661	0.00329897	0	0	0	0	0.000453155	0.00115785	0	0	0	0.000815245	0	0	0	0.0012575	0.0190862	0	0	0	D_0__Bacteria	D_1__Bacteroidetes	D_2__Bacteroidia	D_3__Bacteroidales	D_4__Rikenellaceae	D_5__Alistipes	D_6__
735	0	0	0	0	0	0	0	0	0	0	0	0	0	0	0	0	0	0	0.000569217	0.0115153	0.00109582	0	0	0	0	0	0	0	D_0__Bacteria	D_1__Firmicutes	D_2__Clostridia	D_3__Clostridiales	D_4__Lachnospiraceae	D_5__[Eubacterium] ruminantium group	D_6__uncultured bacterium
764	0.00350263	0	0	0	0	0	0	9.57671e-05	0	0	8.05802e-05	0.00552965	0.0176211	0.025379	0.000113289	0	0	0	0	0	0.0144892	0.0294879	0.0340157	9.67305e-05	0	0	0	0	D_0__Bacteria	D_1__Proteobacteria	D_2__Gammaproteobacteria	D_3__Enterobacteriales	D_4__Enterobacteriaceae	D_5__	D_6__
766	0.00575432	0	0	0.00880545	0.00515595	0.00962241	0.0123328	0.0140778	0.00717817	0.0123711	0.00410959	0.00899924	0.0333543	0.0411005	0.0129149	0.00685064	0	0	0	0.000713339	0.0152198	0.0646033	0.0398354	0.00976978	0.00731804	0	0	0	D_0__Bacteria	D_1__Proteobacteria	D_2__Gammaproteobacteria	D_3__Enterobacteriales	D_4__Enterobacteriaceae	D_5__	D_6__
768	0.00575432	0	0	0.00382123	0.000929761	0.00584653	0.00632658	0.00517142	0.0029119	0.0038488	8.05802e-05	0.00390329	0.00146843	0.00482875	0.00543786	0.00337707	0	0	0	0.00142668	0.00462681	0.000337648	0	0.0069646	0.00850475	0	0	0	D_0__Bacteria	D_1__Proteobacteria	D_2__Gammaproteobacteria	D_3__Enterobacteriales	D_4__Enterobacteriaceae	D_5__	D_6__
770	0	0	0	8.30703e-05	0.000169047	0.00243605	0.00168175	0.00153227	0.00094806	0.00316151	0.00257857	0.000108425	0	0.000112296	0.00135947	0.00135083	0	0	0	0	0	0.000225098	0	0.00193461	0.00178006	0	0	0	D_0__Bacteria	D_1__Proteobacteria	D_2__Gammaproteobacteria	D_3__Enterobacteriales	D_4__Enterobacteriaceae	D_5__	D_6__
775	0.000500375	0	0	0.00274132	0.00329642	0.00121803	0.00184192	0.00191534	0.00121893	0.00206186	0.00104754	0.0013011	0.00335641	0.00404267	0.00181262	0.00183327	0	0	0	0.000815245	0.00304395	0.00540236	0.00551876	0.00135423	0.000494462	0	0	0	D_0__Bacteria	D_1__Proteobacteria	D_2__Gammaproteobacteria	D_3__Enterobacteriales	D_4__Enterobacteriaceae	D_5__Serratia	D_6__
778	0.000500375	0	0	0	0	0	0	0	0	0	0	0.000650548	0.00293686	0.0032566	0	0	0	0	0	0	0.00206989	0.00596511	0.00220751	0	0	0	0	0	D_0__Bacteria	D_1__Proteobacteria	D_2__Gammaproteobacteria	D_3__Enterobacteriales	D_4__Enterobacteriaceae	D_5__	D_6__
810	0.000500375	0.0807362	0.247673	0.00240904	0.00414166	0.00414129	0.0043245	0.00325608	0.00162525	0.00508591	0.000322321	0.000325274	0.0016782	0.000786075	0.00226578	0.000675415	0.00250096	0.00292144	0.00113843	0.00305717	0	0	0	0.00309538	0.00148339	0	0	0	D_0__Bacteria	D_1__Bacteroidetes	D_2__Bacteroidia	D_3__Bacteroidales	D_4__Bacteroidaceae	D_5__Bacteroides	D_6__
813	0.000500375	0	0	0	0	0	0	0	0	0	0	0	0	0	0	0	0.00404002	0.00347414	0.00876594	0	0	0	0	0	0	0	0	0	D_0__Bacteria	D_1__Firmicutes	D_2__Clostridia	D_3__Clostridiales	D_4__Lachnospiraceae	D_5__Lachnoclostridium	D_6__
850	0	0	0	0.00132912	0.0298369	0.000609013	0.00344358	0.0283471	0.0010835	0.00178694	0	0	0	0	0.0147275	0.00588576	0	0	0	0.000713339	0.000487033	0	0	0.000386922	0.000197785	0	0	0	D_0__Bacteria	D_1__Firmicutes	D_2__Bacilli	D_3__Lactobacillales	D_4__Lactobacillaceae	D_5__Lactobacillus	D_6__uncultured bacterium
853	0	0	0	0.00365509	0.00228214	0.00121803	0.000800833	0.00067037	0.0018284	0.000412371	0.00378727	0.000325274	0.00188798	0.000786075	0.00623088	0.00839444	0.000513018	0.000157916	0.000455373	0	0.000121758	0	0	0.000290192	0.000593354	0.00317316	0.00137915	0.00129455	D_0__Bacteria	D_1__Firmicutes	D_2__Bacilli	D_3__Lactobacillales	D_4__Enterococcaceae	D_5__Enterococcus	D_6__
885	0.00150113	0	0	0	0	0	0	0	0	0	0	0	0	0	0.00113289	0	0	0	0	0.0089677	0.00133934	0	0	0.000870575	0.000890032	0	0	0	D_0__Bacteria	D_1__Firmicutes	D_2__Clostridia	D_3__Clostridiales	D_4__Ruminococcaceae	D_5__Ruminococcaceae UCG-014	D_6__uncultured bacterium
887	0	0	0	0.00340588	0.00118333	0.00121803	0.000560583	0.00229841	0.000406311	0	0.0262691	0.00140952	0.0138452	0.0183043	0	0.000192976	0.00500192	0.00615871	0.00842441	0.000101906	0.000487033	0	0	0.000193461	0.0012856	0.018223	0.0426388	0.0545439	D_0__Bacteria	D_1__Firmicutes	D_2__Clostridia	D_3__Clostridiales	D_4__Clostridiaceae 1	D_5__Clostridium sensu stricto 1	D_6__
888	0	0	0	0.000830703	0	0	8.00833e-05	0.000383068	6.77186e-05	0	0.0020145	0	0.00146843	0.00157215	0.000113289	0	0.0007054	0.000789578	0.00125228	0	0	0	0	0	9.88924e-05	0.00126927	0.00425238	0.00371106	D_0__Bacteria	D_1__Firmicutes	D_2__Clostridia	D_3__Clostridiales	D_4__Clostridiaceae 1	D_5__Clostridium sensu stricto 1	D_6__
937	0	0	0	0	0	0	0	0	0	0	0	0	0	0	0	0	0	0	0	0.0219097	0	0	0	0	0.00148339	0	0	0	D_0__Bacteria	D_1__Firmicutes	D_2__Clostridia	D_3__Clostridiales	D_4__Ruminococcaceae	D_5__Ruminiclostridium 6	D_6__
967	0	0	0	0.00282439	0.000591666	0.00158343	0.00104108	0.00105344	0.00176068	0.00302405	0.000886382	0.000758972	0	0.00280741	0.00181262	0.00173678	0.00692574	0.00773786	0.00637523	0.00224192	0	0	0	0.000967305	0.0012856	0	0.000114929	0.000258911	D_0__Bacteria	D_1__Bacteroidetes	D_2__Bacteroidia	D_3__Bacteroidales	D_4__Porphyromonadaceae	D_5__Parabacteroides	D_6__
971	0	0	0	0	0	0	0	0	0	0	0	0	0	0	0	0	0	0	0	0.0212983	0	0	0	0	0	0	0	0.000776733	D_0__Bacteria	D_1__Firmicutes	D_2__Clostridia	D_3__Clostridiales	D_4__Ruminococcaceae	D_5__Faecalibacterium	D_6__uncultured bacterium
976	0	0	0	0.000830703	0.00101428	0.00133983	0.00024025	0	0.00169296	0.00453608	0	0.000650548	0	0	0.000566444	0.000385951	0	0	0	0.00101906	0.000974066	0	0	0.00116077	0.0025712	0	0	0	D_0__Bacteria	D_1__Bacteroidetes	D_2__Bacteroidia	D_3__Bacteroidales	D_4__Rikenellaceae	D_5__Alistipes	D_6__
1017	0	0	0	0	0	0	0	0	0	0	0.00241741	0	0	0	0	0	0.00833654	0.0116068	0.0195811	0	0	0	0	0	0	0	0	0	D_0__Bacteria	D_1__Firmicutes	D_2__Clostridia	D_3__Clostridiales	D_4__Lachnospiraceae	D_5__Lachnoclostridium	D_6__
1069	0	0	0	0.00107991	0.00447976	0	0	0.00124497	0	0	0.000644641	0.00227692	0	0	0	0	0.00359112	0.00521121	0.00170765	0.022725	0	0	0	0	0	0.0111514	0.00838984	0.00621386	D_0__Bacteria	D_1__Firmicutes	D_2__Erysipelotrichia	D_3__Erysipelotrichales	D_4__Erysipelotrichaceae	D_5__Erysipelotrichaceae UCG-003	D_6__uncultured bacterium
1070	0	0	0	0	0	0	0	0	0	0	0	0	0	0	0.000339866	0	0.025202	0.0288985	0.0144581	0	0	0	0	0	0.00039557	0.00154125	0.00160901	0.000517822	D_0__Bacteria	D_1__Firmicutes	D_2__Bacilli	D_3__Bacillales	D_4__Bacillaceae	D_5__Bacillus	D_6__
1109	0	0	0	0.00182755	0.00101428	0.000609013	0.000400416	0.00565026	0.00135437	0.000962199	0	0.000433698	0	0	0	0	0	0	0	0	0	0	0	0	0	0	0	8.63036e-05	D_0__Bacteria	D_1__Bacteroidetes	D_2__Bacteroidia	D_3__Bacteroidales	D_4__Rikenellaceae	D_5__Alistipes	D_6__
1110	0	0	0	0.00232597	0	0	0	0	0.00460486	0	0	0.0057465	0	0	0	0	0.000577145	0	0	0.0721492	0	0	0	0.01006	0.00682358	0	0	0	D_0__Bacteria	D_1__Firmicutes	D_2__Clostridia	D_3__Clostridiales	D_4__Lachnospiraceae	D_5__Blautia	D_6__uncultured bacterium
1113	0	0	0	0	0	0	0	0	0	0	0	0	0	0	0	0	0	0	0	0.0157954	0	0	0	0	0	0	0	0	D_0__Bacteria	D_1__Firmicutes	D_2__Clostridia	D_3__Clostridiales	D_4__Lachnospiraceae	D_5__Lachnospiraceae UCG-003	D_6__uncultured bacterium
1117	0.0020015	0	0	0.000415351	0	0	0	0.000861904	0	0	0	0	0	0	0	0.000675415	0	0	0	0.00927341	0	0	0	0	0.000692247	0	0	0	D_0__Bacteria	D_1__Firmicutes	D_2__Clostridia	D_3__Clostridiales	D_4__Lachnospiraceae	D_5__Blautia	D_6__uncultured bacterium
1174	0.0217663	0	0.0432984	0.00573185	0.00363452	0.00365408	0.0062465	0.00105344	0.0102932	0.00316151	0.00523771	0.0066139	0	0	0.00509799	0.00762254	0.00378351	0.00347414	0.00489526	0.000509528	0.000121758	0	0	0.00251499	0.00356013	0	0.000114929	0	D_0__Bacteria	D_1__Bacteroidetes	D_2__Bacteroidia	D_3__Bacteroidales	D_4__Bacteroidaceae	D_5__Bacteroides	D_6__
1178	0	0	0	0.000498422	0.0014369	0	0	0	0	0.000824742	0	0	0	0	0.000679733	0	0	0	0	0.00529909	0	0	0	0	0	0	0	0	D_0__Bacteria	D_1__Firmicutes	D_2__Clostridia	D_3__Clostridiales	D_4__Lachnospiraceae	D_5__Coprococcus 2	D_6__uncultured bacterium
1185	0.00375281	0	0	0	0	0	0	0	0	0	0	0	0	0	0	0	0	0	0	0.0190564	0.00280044	0	0	0	0	0	0	0	D_0__Bacteria	D_1__Firmicutes	D_2__Clostridia	D_3__Clostridiales	D_4__Ruminococcaceae	D_5__Subdoligranulum	D_6__uncultured bacterium
1226	0.00425319	0	0.000886656	0.00764247	0.00380357	0.00682095	0.00520541	0.0169508	0.00480802	0.00646048	8.05802e-05	0.00216849	0	0	0.000793021	0.000868391	0	0.000157916	0	0.000611434	0	0	0	0.00851228	0.0126582	0	0	0	D_0__Bacteria	D_1__Bacteroidetes	D_2__Bacteroidia	D_3__Bacteroidales	D_4__Rikenellaceae	D_5__Alistipes	D_6__
1227	0	0	0	0	0	0.000852619	0	0.00105344	0	0	0	0	0	0	0	0	0.013082	0.0108172	0.0144581	0.00275145	0	0	0	0	0	0	0	0.000431518	D_0__Bacteria	D_1__Firmicutes	D_2__Clostridia	D_3__Clostridiales	D_4__Lachnospiraceae	D_5__Sellimonas	D_6__
1230	0	0	0	0.00299053	0.00135238	0.00414129	0.00376391	0.00277725	0.00406311	0.00536082	0.0020145	0.00487911	0	0	0.00158604	0.00135083	0.0200718	0.0265298	0.00523679	0.00662387	0	0	0	0.00435287	0.00148339	0	0	8.63036e-05	D_0__Bacteria	D_1__Bacteroidetes	D_2__Bacteroidia	D_3__Bacteroidales	D_4__Bacteroidaceae	D_5__Bacteroides	D_6__
1231	0	0	0	0	0	0	0	0.00067037	0	0	0	0	0	0	0	0	0	0	0	0.0090696	0	0	0	0	0	0	0	0	D_0__Bacteria	D_1__Firmicutes	D_2__Clostridia	D_3__Clostridiales	D_4__Lachnospiraceae	D_5__Roseburia	D_6__
1234	0	0	0	0.000830703	0.000591666	0.000852619	0.000880916	0	0.00230243	0.00151203	0	0	0	0	0.000793021	0	0	0	0	0.00642006	0	0	0	0.00145096	0.00445016	0	0	0	D_0__Bacteria	D_1__Bacteroidetes	D_2__Bacteroidia	D_3__Bacteroidales	D_4__Rikenellaceae	D_5__Alistipes	D_6__uncultured bacterium
1241	0	0	0	0	0	0	0	0	0.00101578	0	0	0	0	0	0.00158604	0	0	0	0	0.0122287	0	0	0	0.000967305	0.00108782	0	0	0	D_0__Bacteria	D_1__Firmicutes	D_2__Clostridia	D_3__Clostridiales	D_4__Ruminococcaceae	D_5__Subdoligranulum	D_6__uncultured bacterium
1279	0	0	0	0	0	0.00280146	0	0	0.00101578	0	0.00016116	0	0	0	0	0	0.04335	0.0404264	0.0477004	0.0122287	0	0	0	0.000967305	0.000988924	0.100725	0.0701069	0.0839734	D_0__Bacteria	D_1__Firmicutes	D_2__Clostridia	D_3__Clostridiales	D_4__Lachnospiraceae	D_5__	D_6__
1341	0.00450338	0.0208589	0.0153687	0.000498422	0.000169047	0.00158343	0.00072075	9.57671e-05	0.00135437	0.00137457	0.000402901	0.00368644	0	0.000336889	0.00090631	0.000385951	0.00179556	0.00173707	0.000569217	0.000305717	0	0	0	0.0012575	0.00108782	0	0	0	D_0__Bacteria	D_1__Bacteroidetes	D_2__Bacteroidia	D_3__Bacteroidales	D_4__Bacteroidaceae	D_5__Bacteroides	D_6__
1343	0.00625469	0.00858896	0.00724102	8.30703e-05	0	0.000121803	0.00024025	0	0.000270874	0.000274914	8.05802e-05	0.00173479	0.000209776	0.000224593	0.000226578	0.000192976	0.000448891	0.000868535	0.000569217	0	0	0	0	9.67305e-05	0.000197785	0	0	0	D_0__Bacteria	D_1__Bacteroidetes	D_2__Bacteroidia	D_3__Bacteroidales	D_4__Bacteroidaceae	D_5__Bacteroides	D_6__
1344	0.00225169	0.00638037	0.00354662	0.000913773	8.45237e-05	0	0.00128133	0.000287301	0.000880341	0.000687285	0.00016116	0.000433698	0	0	0.000679733	0.000578927	0.000769527	0.000315831	0.000113843	0.000203811	0	0	0	0.000193461	0.000296677	0	0	0	D_0__Bacteria	D_1__Bacteroidetes	D_2__Bacteroidia	D_3__Bacteroidales	D_4__Bacteroidaceae	D_5__Bacteroides	D_6__
1372	0	0	0	0	0	0.000243605	0	0	0	0	0	0	0	0	0	0	0.00961908	0.00426372	0.024704	0.000101906	0	0	0	0.000193461	9.88924e-05	0	0	0	D_0__Bacteria	D_1__Firmicutes	D_2__Clostridia	D_3__Clostridiales	D_4__Ruminococcaceae	D_5__Flavonifractor	D_6__
1373	0	0	0	0	0	0	0	0	6.77186e-05	0	0	0	0	0	0	0	0.000320636	0.00118437	0.00922131	0.000101906	0	0	0	0	0	0	0	0	D_0__Bacteria	D_1__Firmicutes	D_2__Clostridia	D_3__Clostridiales	D_4__Ruminococcaceae	D_5__	D_6__
1385	0.0620465	0.0831902	0.0452194	0.0127098	0.00405714	0.00876979	0.0117722	0.00191534	0.00724589	0.0101718	0.00410959	0.00552965	0	0	0.00521128	0.00723659	0.0166731	0.0209238	0.00774135	0.0090696	0.00219165	0	0	0.0103502	0.00573576	0	0	0	D_0__Bacteria	D_1__Bacteroidetes	D_2__Bacteroidia	D_3__Bacteroidales	D_4__Porphyromonadaceae	D_5__Parabacteroides	D_6__
1386	0.0115086	0.0149693	0.00753657	0.00274132	0.000338095	0.00219245	0.00112117	0.000766137	0.00169296	0.0019244	0.000644641	0.000758972	0	0	0.000566444	0.000675415	0.00198794	0.00347414	0.00102459	0.000407623	0.000243516	0	0	0.00183788	0.000791139	0	0	0	D_0__Bacteria	D_1__Bacteroidetes	D_2__Bacteroidia	D_3__Bacteroidales	D_4__Porphyromonadaceae	D_5__Parabacteroides	D_6__
1387	0.0442832	0.0596319	0.0280774	0.000581492	0	0.000121803	0.00072075	0	0.000270874	0.000274914	0.000241741	0.00379486	0	0.000561482	0.000226578	0.000192976	0.00102604	0.000947493	0.00068306	0	0.00121758	0	0.000100341	0.000580383	0.000296677	0	0	0	D_0__Bacteria	D_1__Bacteroidetes	D_2__Bacteroidia	D_3__Bacteroidales	D_4__Porphyromonadaceae	D_5__Parabacteroides	D_6__
1391	0.00775582	0.0161963	0.00871878	0.000581492	0.000253571	0.000730816	0.00120125	0.000383068	0.00094806	0.00151203	0.000402901	0.000216849	0	0	0.000453155	0.000675415	0.00147493	0.00181603	0.000796903	0.00101906	0.000365275	0	0	0.00145096	0.000692247	0	0	0	D_0__Bacteria	D_1__Bacteroidetes	D_2__Bacteroidia	D_3__Bacteroidales	D_4__Porphyromonadaceae	D_5__Parabacteroides	D_6__
1417	0.00175131	0	0	0.000498422	0.00067619	0.000730816	0.00112117	0.000861904	0.000812623	0.000687285	0.000322321	0.00878239	0.0132159	0.00797305	0.000679733	0.000482439	0	0	0	0	0.0164374	0.0130557	0.012342	0.00135423	0.000593354	0	0	0	D_0__Bacteria	D_1__Proteobacteria	D_2__Gammaproteobacteria	D_3__Enterobacteriales	D_4__Enterobacteriaceae	D_5__Hafnia-Obesumbacterium	D_6__
1418	0	0	0	0.00282439	0.00422619	0	0.00024025	0.000191534	0	0	8.05802e-05	0.00260219	0.00398574	0.00134756	0.000339866	0	0	0	0	0.000407623	0.00474857	0.00303883	0.00250853	0	0	0	0	0	D_0__Bacteria	D_1__Proteobacteria	D_2__Gammaproteobacteria	D_3__Enterobacteriales	D_4__Enterobacteriaceae	D_5__Hafnia-Obesumbacterium	D_6__
1421	0	0	0	0.000415351	0.000338095	0.00219245	0.000560583	0.000574603	0.000135437	0.000412371	0.000241741	0.019408	0.027061	0.000224593	0.000453155	0.000192976	0	0	0	0.000101906	0.00121758	0.000450197	0.000602047	0.00145096	0.000494462	0	0	0	D_0__Bacteria	D_1__Proteobacteria	D_2__Gammaproteobacteria	D_3__Enterobacteriales	D_4__Enterobacteriaceae	D_5__Hafnia-Obesumbacterium	D_6__
1429	0.00175131	0	0	0	0.000253571	0.000121803	8.00833e-05	0	0	0.000137457	0	0.00607178	0.00755192	0.00460415	0.000113289	0	0	0	0	0	0.0108365	0.0077659	0.00812763	9.67305e-05	0	0	0	0	D_0__Bacteria	D_1__Proteobacteria	D_2__Gammaproteobacteria	D_3__Enterobacteriales	D_4__Enterobacteriaceae	D_5__Hafnia-Obesumbacterium	D_6__
1459	0.00300225	0	0	0.00141219	0.00287381	0.00389769	0.00296308	0.00191534	0.00155753	0.0019244	0.000886382	0.016589	0.0201385	0.0116788	0.00237906	0.00164029	0	0	0	0.000203811	0.0250822	0.0181204	0.0196669	0.00299865	0.0025712	0	0	0	D_0__Bacteria	D_1__Proteobacteria	D_2__Gammaproteobacteria	D_3__Enterobacteriales	D_4__Enterobacteriaceae	D_5__Hafnia-Obesumbacterium	D_6__
1460	0.000750563	0	0	0.000166141	0	0.000365408	8.00833e-05	0.000383068	6.77186e-05	0.000274914	8.05802e-05	0.00303589	0.00377596	0.00393038	0.000566444	9.64878e-05	0	0	0	0	0.00389626	0.00517727	0.00411399	0.000580383	0.00039557	0	0	0	D_0__Bacteria	D_1__Proteobacteria	D_2__Gammaproteobacteria	D_3__Enterobacteriales	D_4__Enterobacteriaceae	D_5__Hafnia-Obesumbacterium	D_6__
1482	0.00525394	0	0	0	0	0.000121803	8.00833e-05	0	0.000203156	0	0	0.0202754	0.0304175	0.0240314	0.000113289	0	0	0	0	0	0.0455376	0.0300506	0.0348184	9.67305e-05	0	0	0	0	D_0__Bacteria	D_1__Proteobacteria	D_2__Gammaproteobacteria	D_3__Enterobacteriales	D_4__Enterobacteriaceae	D_5__Hafnia-Obesumbacterium	D_6__
1484	0	0	0	0	0	0	0	0	0	0	0	0.00281904	0.00230753	0.00213363	0	0	0	0	0	0	0.00401802	0.00225098	0.00301023	0	0	0	0	0	D_0__Bacteria	D_1__Proteobacteria	D_2__Gammaproteobacteria	D_3__Enterobacteriales	D_4__Enterobacteriaceae	D_5__Hafnia-Obesumbacterium	D_6__
1507	0.00175131	0.000981595	0.00147776	0.00182755	8.45237e-05	0.00255786	0.0024025	0.000574603	0.00250559	0.00439863	0.000564061	0.000433698	0	0	0.00215249	0.000578927	0.000448891	0.000631662	0.00182149	0.000305717	0	0	0	0.000193461	0.00306566	0	0	0	D_0__Bacteria	D_1__Bacteroidetes	D_2__Bacteroidia	D_3__Bacteroidales	D_4__Porphyromonadaceae	D_5__Parabacteroides	D_6__
1508	0.00300225	0.0127607	0.00768435	0.00232597	0.000338095	0.00121803	0.00256267	0.000191534	0.00507889	0.00412371	0.000805802	0.00108425	0.000209776	0.000112296	0.00124618	9.64878e-05	0.00320636	0.00071062	0.000910747	0.000101906	0	0	0	0.000193461	0.000890032	0	0	0	D_0__Bacteria	D_1__Bacteroidetes	D_2__Bacteroidia	D_3__Bacteroidales	D_4__Porphyromonadaceae	D_5__Parabacteroides	D_6__
1510	0.0162622	0.0120245	0.00901433	0.00149526	0.000338095	0.00109622	0.00112117	0.000287301	0.00155753	0.00109966	0.000322321	0.00303589	0	0.000449186	0.00113289	0.000578927	0.000448891	0.00071062	0.000227687	0.000305717	0	0	0	0.000483653	0.00158228	0	0	0	D_0__Bacteria	D_1__Bacteroidetes	D_2__Bacteroidia	D_3__Bacteroidales	D_4__Porphyromonadaceae	D_5__Parabacteroides	D_6__
1511	0.0105079	0.0110429	0.00591104	8.30703e-05	0	0.000243605	0.000160167	9.57671e-05	0.000135437	0.000274914	0	0.00195164	0	0.000449186	0.000226578	0	0	0.000157916	0.000113843	0	0	0	0	0.000290192	0.000494462	0	0	0	D_0__Bacteria	D_1__Bacteroidetes	D_2__Bacteroidia	D_3__Bacteroidales	D_4__Porphyromonadaceae	D_5__Parabacteroides	D_6__
1538	0	0	0	0	0.00135238	0	0	0.000861904	0	0	0	0	0	0	0	0	0	0	0	0.0114134	0	0	0	0	0.000791139	0	0	0	D_0__Bacteria	D_1__Firmicutes	D_2__Clostridia	D_3__Clostridiales	D_4__Lachnospiraceae	D_5__[Eubacterium] eligens group	D_6__
1539	0	0	0	0	0	0	0	0	0.00121893	0	0	0	0	0	0	0.000868391	0	0	0	0.0207887	0	0	0	0	0	0	0	0	D_0__Bacteria	D_1__Firmicutes	D_2__Clostridia	D_3__Clostridiales	D_4__Lachnospiraceae	D_5__[Eubacterium] eligens group	D_6__uncultured bacterium
1572	0	0	0	0.000830703	0	0.000243605	0.0004805	0	0.00148981	0.000549828	0.000402901	0.000108425	0	0	0.000453155	0	0.003527	0.00386893	0.00113843	0	0	0	0	0	0.000296677	0	0	0	D_0__Bacteria	D_1__Bacteroidetes	D_2__Bacteroidia	D_3__Bacteroidales	D_4__Bacteroidaceae	D_5__Bacteroides	D_6__
1574	0	0.00319018	0.00413773	0.000581492	8.45237e-05	0.000121803	0.00112117	0	0.00230243	0.00123711	8.05802e-05	0.000216849	0	0	0.000339866	0.000192976	0.00673336	0.00457955	0.00125228	0.000101906	0	0	0	0.000193461	0.000197785	0	0	0	D_0__Bacteria	D_1__Bacteroidetes	D_2__Bacteroidia	D_3__Bacteroidales	D_4__Bacteroidaceae	D_5__Bacteroides	D_6__
1581	0	0	0	0.078003	0.0258643	0.0599269	0.0687115	0.0140778	0.0772669	0.0569072	0.0461724	0.0502006	0	0.00213363	0.0445225	0.0419722	0.150122	0.152467	0.0765027	0.0191583	0.0142457	0	0	0.0529116	0.0514241	0	0	0	D_0__Bacteria	D_1__Bacteroidetes	D_2__Bacteroidia	D_3__Bacteroidales	D_4__Bacteroidaceae	D_5__Bacteroides	D_6__uncultured bacterium
1583	0	0	0	0.000830703	0	0.000852619	0.000960999	9.57671e-05	0.00196384	0.000962199	0.00104754	0.00292746	0	0	0.00113289	0.00115785	0.0028216	0.00252665	0.00102459	0.000509528	0.000974066	0	0	0.00106404	0.000593354	0	0	0	D_0__Bacteria	D_1__Bacteroidetes	D_2__Bacteroidia	D_3__Bacteroidales	D_4__Bacteroidaceae	D_5__Bacteroides	D_6__
1610	0.00150113	0	0	0.000249211	0	0.000487211	0.00024025	0.000287301	6.77186e-05	0.000687285	0.000483481	0.00216849	0.00671282	0.00707468	0.000453155	9.64878e-05	0	0	0	0.000101906	0.00450505	0.00990433	0.0107365	0.000386922	0.000197785	0	0	0	D_0__Bacteria	D_1__Proteobacteria	D_2__Gammaproteobacteria	D_3__Enterobacteriales	D_4__Enterobacteriaceae	D_5__	D_6__
1611	0.00175131	0	0	0.000830703	0.000760713	0.00207065	0.0014415	0.000957671	0.000338593	0.00151203	0.00177276	0.00303589	0.00985945	0.0126895	0.00158604	0.000868391	0	0	0	0.000101906	0.0101059	0.0148565	0.0203693	0.00183788	0.00118671	0	0	0	D_0__Bacteria	D_1__Proteobacteria	D_2__Gammaproteobacteria	D_3__Enterobacteriales	D_4__Enterobacteriaceae	D_5__	D_6__
1614	0.000500375	0	0	0.000913773	0.000929761	0.000121803	8.00833e-05	0.000191534	0	0	0	0.000216849	0.00146843	0.00202134	0	9.64878e-05	0	0	0	0.000101906	0.00231341	0.00225098	0.0017058	9.67305e-05	9.88924e-05	0	0	0	D_0__Bacteria	D_1__Proteobacteria	D_2__Gammaproteobacteria	D_3__Enterobacteriales	D_4__Enterobacteriaceae	D_5__	D_6__
1619	0.000750563	0	0	0	8.45237e-05	0	0	0	0	0	0	0.00238534	0.00314663	0.00449186	0	9.64878e-05	0	0	0	0	0.00365275	0.00630276	0.00581979	0	0	0	0	0	D_0__Bacteria	D_1__Proteobacteria	D_2__Gammaproteobacteria	D_3__Enterobacteriales	D_4__Enterobacteriaceae	D_5__Serratia	D_6__
1643	0.0215161	0	0	0.000332281	0.000760713	0.000243605	0.000160167	0.000861904	0	0	0	0.00227692	0	0	0.000339866	9.64878e-05	0	0	0	0	0.0159503	0	0	0.000386922	0	0	0	0	D_0__Bacteria	D_1__Proteobacteria	D_2__Gammaproteobacteria	D_3__Alteromonadales	D_4__Shewanellaceae	D_5__Shewanella	D_6__
1644	0.00150113	0	0	0	0	0.000243605	0	0	0.000203156	0	0.00966962	0.000325274	0.000209776	0	0.000113289	9.64878e-05	0	0	0	0	0	0	0.000301023	9.67305e-05	0	0	0	0	D_0__Bacteria	D_1__Proteobacteria	D_2__Gammaproteobacteria	D_3__Enterobacteriales	D_4__Enterobacteriaceae	D_5__	D_6__
1665	0	0	0	0.000747632	0.000422619	0.00133983	0.00072075	0.000766137	0.00223471	0.000824742	0.00322321	0.00238534	0.00335641	0.00291971	0.00362524	0.00656117	6.41272e-05	7.89578e-05	0.000113843	0	0.000121758	0	0	0.000290192	0.000593354	0.00199456	0.00126422	0.00181238	D_0__Bacteria	D_1__Firmicutes	D_2__Bacilli	D_3__Lactobacillales	D_4__Enterococcaceae	D_5__Enterococcus	D_6__
1670	0	0	0	0.00132912	0.00067619	0.000121803	0.00120125	0.000287301	0.000744904	0.000412371	0.00136986	0.000216849	0.000629327	0.000336889	0.00169933	0.00183327	0.000192382	0	0.000113843	0	0	0	0	0.000483653	0.00039557	0.000725295	0.000114929	0.000345214	D_0__Bacteria	D_1__Firmicutes	D_2__Bacilli	D_3__Lactobacillales	D_4__Enterococcaceae	D_5__Enterococcus	D_6__
1705	0.00100075	0	0	0.000747632	8.45237e-05	0.000243605	0.000160167	0.00134074	0.000135437	0	0.00427075	0.000433698	0.00923012	0.00763616	0	0	0.00185969	0.00181603	0.00068306	0	0.000121758	0	0	0	0.000197785	0.00407978	0.00735548	0.0111332	D_0__Bacteria	D_1__Firmicutes	D_2__Clostridia	D_3__Clostridiales	D_4__Clostridiaceae 1	D_5__Clostridium sensu stricto 1	D_6__
1706	0	0	0	0	0	0	0	0	0	0	0.00104754	0.000542123	0.00503461	0.00404267	0.000113289	0	0.000384763	0.000631662	0.000113843	0	0.000121758	0	0	0	0	0.000634633	0.00241352	0.00258911	D_0__Bacteria	D_1__Firmicutes	D_2__Clostridia	D_3__Clostridiales	D_4__Clostridiaceae 1	D_5__Clostridium sensu stricto 1	D_6__
1738	0	0	0	0.000249211	0	0.000487211	8.00833e-05	0	0	0.000549828	8.05802e-05	0.000216849	0	0	0.000113289	0.00357005	0.00551494	0.00323727	0.0163934	0.000305717	0	0	0	0.000290192	9.88924e-05	0	0	0	D_0__Bacteria	D_1__Firmicutes	D_2__Clostridia	D_3__Clostridiales	D_4__Eubacteriaceae	D_5__Eubacterium	D_6__
1741	0	0	0	0.000166141	0.00118333	0.000609013	0.00072075	0	0.000406311	0.000412371	0.000483481	0.000433698	0	0	0	0.0125434	0.0159036	0.0109751	0.0413251	0.000611434	0.000243516	0	0	0.000193461	0.00108782	0	0	0	D_0__Bacteria	D_1__Firmicutes	D_2__Clostridia	D_3__Clostridiales	D_4__Eubacteriaceae	D_5__Eubacterium	D_6__
1742	0	0	0	0	0.000338095	0.000121803	0.000400416	0	0.000135437	0.000412371	0	0	0	0	0	0.00328059	0.00397589	0.00315831	0.0124089	0.000203811	0	0	0	0	0.00039557	0	0	0	D_0__Bacteria	D_1__Firmicutes	D_2__Clostridia	D_3__Clostridiales	D_4__Eubacteriaceae	D_5__Eubacterium	D_6__
1759	0	0	0	0	0.000169047	0.000243605	0	0	0	0	0.00257857	0	0	0	0.000226578	0	0.0226369	0.0254244	0.0517987	0.000203811	0	0	0	0	0.000197785	0	0	0	D_0__Bacteria	D_1__Firmicutes	D_2__Clostridia	D_3__Clostridiales	D_4__Lachnospiraceae	D_5__Lachnoclostridium	D_6__
1760	0	0	0	0	0	0.000243605	0	0	0	0	0.000805802	0	0	0	0	9.64878e-05	0.00513018	0.00963285	0.0195811	0.000101906	0	0	0	0	0.000296677	0	0	0	D_0__Bacteria	D_1__Firmicutes	D_2__Clostridia	D_3__Clostridiales	D_4__Lachnospiraceae	D_5__Lachnoclostridium	D_6__
1784	0.112835	0	0.063987	0.0642964	0.0198631	0.0540804	0.0594218	0.0177169	0.056545	0.0611684	0.00419017	0.0436951	0.00419551	0.00651319	0.0178996	0.012061	0.0196229	0.0257402	0.00705829	0.0112096	0	0	0	0.0442058	0.0343157	0	0	0	D_0__Bacteria	D_1__Bacteroidetes	D_2__Bacteroidia	D_3__Bacteroidales	D_4__Bacteroidaceae	D_5__Bacteroides	D_6__
1786	0.00650488	0	0.00443328	0.000581492	0.000253571	0.000852619	0.00128133	9.57671e-05	0.00135437	0.00123711	8.05802e-05	0.00281904	0	0.000112296	0.000453155	0	0.000256509	0.000552704	0.000113843	0.000101906	0	0	0	0.000773844	0.000494462	0	0	0	D_0__Bacteria	D_1__Bacteroidetes	D_2__Bacteroidia	D_3__Bacteroidales	D_4__Bacteroidaceae	D_5__Bacteroides	D_6__
1805	0	0	0	0.0061472	0.00228214	0.00803898	0.00993033	0.00383068	0.00866798	0.00522337	0	0.0121436	0	0.000336889	0.00759035	0.00588576	0.000769527	0.000315831	0	0.00112096	0.00694022	0	0	0.0124782	0.0090981	0	0	0	D_0__Bacteria	D_1__Bacteroidetes	D_2__Bacteroidia	D_3__Bacteroidales	D_4__Bacteroidaceae	D_5__Bacteroides	D_6__
1806	0.00350263	0	0	0.00124605	0	0.00280146	0.0014415	0	0.0036568	0.000687285	0.0152297	0.00173479	0	0	0.00249235	0.00443844	0.0146851	0.0213186	0.0289162	0.00458575	0.00182637	0	0	0.00251499	0.00158228	0	0	0	D_0__Bacteria	D_1__Bacteroidetes	D_2__Bacteroidia	D_3__Bacteroidales	D_4__Bacteroidaceae	D_5__Bacteroides	D_6__
1807	0	0	0	0.00207676	0.00583214	0.00280146	0.00368383	0.00823597	0.00318277	0.00508591	0.000322321	0.000433698	0	0	0	0	0.0056432	0.005606	0.00295993	0.00438194	0	0	0	0.000967305	0	0	0	0	D_0__Bacteria	D_1__Bacteroidetes	D_2__Bacteroidia	D_3__Bacteroidales	D_4__Bacteroidaceae	D_5__Bacteroides	D_6__
1808	0.0327746	0	0.0286685	0.00647948	0.00371904	0.00511571	0.00744775	0.00143651	0.00704273	0.00604811	0.0012087	0.00726445	0	0	0.00373853	0.00115785	0.000128254	7.89578e-05	0	0.00101906	0	0	0	0.0108338	0.00929589	0	0	0	D_0__Bacteria	D_1__Bacteroidetes	D_2__Bacteroidia	D_3__Bacteroidales	D_4__Bacteroidaceae	D_5__Bacteroides	D_6__uncultured bacterium
1841	0	0	0	0.00124605	0.00287381	0.000487211	0.000320333	0.00928941	0.00101578	0.00123711	0.000805802	0.0074813	0	0.000898372	0	0	0.00346287	0.00284248	0.0114982	0.00254764	0	0	0	0	0.00039557	0.0363554	0.0155155	0.00612756	D_0__Bacteria	D_1__Firmicutes	D_2__Clostridia	D_3__Clostridiales	D_4__Lachnospiraceae	D_5__[Ruminococcus] torques group	D_6__
1876	0.00100075	0	0	0	0.000507142	0	0	0	0	0	0	0	0	0	0	0	0.000128254	0.000157916	0.000910747	0.00682768	0	0	0	0	0	0	0	0	D_0__Bacteria	D_1__Firmicutes	D_2__Clostridia	D_3__Clostridiales	D_4__Lachnospiraceae	D_5__Fusicatenibacter	D_6__uncultured bacterium
1879	0	0	0	0	0	0	0	0	0	0	0	0	0	0	0	0	0	0	0	0.0112096	0	0	0	0	0	0	0	0	D_0__Bacteria	D_1__Firmicutes	D_2__Clostridia	D_3__Clostridiales	D_4__Lachnospiraceae	D_5__Lachnospiraceae NK4A136 group	D_6__uncultured bacterium
1896	0	0	0	0	0	0	0	0	0	0	0	0	0	0	0	0	0	0	0	0.0887598	0.00413978	0	0	0	0	0	0	0	D_0__Bacteria	D_1__Firmicutes	D_2__Clostridia	D_3__Clostridiales	D_4__Ruminococcaceae	D_5__Faecalibacterium	D_6__uncultured bacterium
1897	0	0	0	0	0	0	0	0	0	0	0	0	0	0	0	0	0	0	0	0.0340365	0	0	0	0	0	0	0	0	D_0__Bacteria	D_1__Firmicutes	D_2__Clostridia	D_3__Clostridiales	D_4__Ruminococcaceae	D_5__Faecalibacterium	D_6__uncultured bacterium
1919	0.000500375	0	0	0.0092208	0.0140309	0.0107186	0.00920958	0.0432867	0.00819395	0.00824742	0.00257857	0.00119267	0	0	0.000566444	0.000482439	0.0007054	0.000868535	0.00113843	0.0017324	0.000487033	0	0	0.000870575	0.0012856	0	0	0	D_0__Bacteria	D_1__Bacteroidetes	D_2__Bacteroidia	D_3__Bacteroidales	D_4__Rikenellaceae	D_5__Alistipes	D_6__uncultured bacterium
1920	0	0	0	0.000332281	0.0117488	0.00133983	0.00104108	0.0105344	0.0029119	0.00274914	0.000402901	0	0	0	0.0010196	0	0.000769527	0.000473747	0.00068306	0.00112096	0	0	0	0.00870575	0.0135483	0.000181324	0	0	D_0__Bacteria	D_1__Bacteroidetes	D_2__Bacteroidia	D_3__Bacteroidales	D_4__Rikenellaceae	D_5__Alistipes	D_6__
1938	0	0	0	0	0.00507142	0.0088916	0	0	0	0	0	0	0	0	0	0	0	0	0	0.0879446	0.00474857	0	0	0.00580383	0	0	0	0	D_0__Bacteria	D_1__Firmicutes	D_2__Clostridia	D_3__Clostridiales	D_4__Lachnospiraceae	D_5__[Eubacterium] rectale group	D_6__uncultured bacterium
1940	0	0	0	0	0	0	0	0	0	0	0	0	0	0	0	0	0	0	0	0.0190564	0	0	0	0	0	0	0	0	D_0__Bacteria	D_1__Firmicutes	D_2__Clostridia	D_3__Clostridiales	D_4__Lachnospiraceae	D_5__	D_6__
1964	0	0	0	0.00423658	0.00152143	0.00487211	0.00448466	0.0136947	0.00453714	0.00261168	8.05802e-05	0.00151794	0	0	0.00147275	0.00192976	0	0	0	0.00305717	0	0	0	0.00319211	0.00514241	0	0	0	D_0__Bacteria	D_1__Bacteroidetes	D_2__Bacteroidia	D_3__Bacteroidales	D_4__Porphyromonadaceae	D_5__Barnesiella	D_6__
1965	0	0	0	0.00166141	0.000591666	0.00231425	0.000960999	0.00536296	0.00297962	0.0019244	0.000241741	0.000216849	0	0	0.000453155	0.000385951	0	0	0.000227687	0.000917151	0	0	0	0.00164442	0.00168117	0	0	0	D_0__Bacteria	D_1__Bacteroidetes	D_2__Bacteroidia	D_3__Bacteroidales	D_4__Porphyromonadaceae	D_5__Barnesiella	D_6__
1979	0	0	0	0.00191062	0.00067619	0.000974421	0.000960999	0.00488412	0.00304734	0.000687285	8.05802e-05	0.000433698	0	0	0.000566444	0.000192976	0	7.89578e-05	0	0.00132477	0	0	0	0.00135423	0.0012856	0	0	0	D_0__Bacteria	D_1__Bacteroidetes	D_2__Bacteroidia	D_3__Bacteroidales	D_4__Porphyromonadaceae	D_5__Barnesiella	D_6__
1980	0	0	0	0.00141219	0.000929761	0.00133983	0.00256267	0.00746983	0.00209928	0.00123711	0.000241741	0.000867397	0	0	0.000679733	0.00135083	0	0	0	0.000713339	0	0	0	0.00212807	0.00187896	0	0	0	D_0__Bacteria	D_1__Bacteroidetes	D_2__Bacteroidia	D_3__Bacteroidales	D_4__Porphyromonadaceae	D_5__Barnesiella	D_6__
1990	0.11934	0.388466	0.247229	0.0804951	0.0170738	0.0669915	0.0755185	0.0198238	0.0832261	0.0789003	0.0215149	0.0584409	0.00230753	0.0126895	0.0473547	0.0405249	0.118315	0.122463	0.0851548	0.0190564	0	0	0	0.0734185	0.0397547	0.000453309	0.000229859	0.000345214	D_0__Bacteria	D_1__Bacteroidetes	D_2__Bacteroidia	D_3__Bacteroidales	D_4__Bacteroidaceae	D_5__Bacteroides	D_6__uncultured organism
1993	0.000750563	0.000490798	0.000886656	0.00124605	8.45237e-05	0.000852619	0.001922	0.000861904	0.00162525	0.00151203	0.00016116	0.00108425	0	0	0.00124618	0.000578927	0.000641272	0.00142124	0.00034153	0.000101906	0	0	0	0.000580383	0.00039557	0	0	0	D_0__Bacteria	D_1__Bacteroidetes	D_2__Bacteroidia	D_3__Bacteroidales	D_4__Bacteroidaceae	D_5__Bacteroides	D_6__
2012	0.00100075	0	0	0.000332281	0.000507142	0.000852619	0.00112117	0.00067037	0.000677186	0.000549828	0.000402901	0.00487911	0.00398574	0.00617631	0.000793021	0.000289464	0	0	0	0	0.0121758	0.00877884	0.00742525	9.67305e-05	0.000494462	0	0	0	D_0__Bacteria	D_1__Proteobacteria	D_2__Gammaproteobacteria	D_3__Enterobacteriales	D_4__Enterobacteriaceae	D_5__Hafnia-Obesumbacterium	D_6__
2016	0	0	0	0.00116298	0.001775	0.00194884	0.00184192	0.00114921	0.00162525	0.00151203	0.000483481	0.000108425	0.000419551	0.000336889	0.000793021	0.000771903	0	0	0	0.000203811	0.000365275	0.000112549	0.000301023	0.00164442	0.00168117	0	0	0	D_0__Bacteria	D_1__Proteobacteria	D_2__Gammaproteobacteria	D_3__Enterobacteriales	D_4__Enterobacteriaceae	D_5__Hafnia-Obesumbacterium	D_6__
2017	0.00175131	0	0	0	0	0.000243605	0	9.57671e-05	0	0	0	0.00498753	0.00461506	0.00460415	0	0	0	0	0	0	0.00706197	0.00596511	0.00642183	0	9.88924e-05	0	0	0	D_0__Bacteria	D_1__Proteobacteria	D_2__Gammaproteobacteria	D_3__Enterobacteriales	D_4__Enterobacteriaceae	D_5__Hafnia-Obesumbacterium	D_6__
2024	0	0	0	0.00132912	0.00228214	0.00109622	0.00136142	0.000957671	0.000677186	0.00137457	0.000805802	0.000216849	0.000419551	0.000224593	0.00124618	0.000578927	0	0	0	0.000101906	0.000974066	0.000225098	0.000200682	0.00154769	0.00158228	0	0	0	D_0__Bacteria	D_1__Proteobacteria	D_2__Gammaproteobacteria	D_3__Enterobacteriales	D_4__Enterobacteriaceae	D_5__Hafnia-Obesumbacterium	D_6__
2043	0.303728	0.220859	0.173046	0.0892175	0.0155524	0.103167	0.0820854	0.0316989	0.079637	0.111753	0.0449637	0.0603925	0.00125865	0.00819764	0.0590235	0.047279	0.040849	0.0409791	0.0466758	0.0118211	0	0	0	0.0433353	0.103145	0	0	0	D_0__Bacteria	D_1__Bacteroidetes	D_2__Bacteroidia	D_3__Bacteroidales	D_4__Porphyromonadaceae	D_5__Parabacteroides	D_6__
2048	0.000500375	0	0	0.00149526	0	0.000852619	0.0033635	0.000957671	0.00203156	0.00219931	0.000241741	0.000216849	0	0.000336889	0.000453155	0.000964878	0.000769527	0.000868535	0.000569217	0.000203811	0	0	0	0.000290192	0.000988924	0	0	0	D_0__Bacteria	D_1__Bacteroidetes	D_2__Bacteroidia	D_3__Bacteroidales	D_4__Porphyromonadaceae	D_5__Parabacteroides	D_6__
2065	0.0307731	0	0	0.0690314	0.0515595	0.091961	0.0928165	0.0801571	0.0531591	0.0988316	0.0900886	0.0640789	0.163625	0.221336	0.0797553	0.0500772	0	0.00110541	0	0.00652196	0.151589	0.294204	0.313566	0.0804798	0.0676424	0	0	0	D_0__Bacteria	D_1__Proteobacteria	D_2__Gammaproteobacteria	D_3__Enterobacteriales	D_4__Enterobacteriaceae	D_5__	D_6__
2072	0	0	0	0	8.45237e-05	0	0	0	0	0	0	0.00140952	0.00377596	0.00235823	0	0	0	0	0	0	0.00206989	0.00292628	0.00451535	0	0	0	0	0	D_0__Bacteria	D_1__Proteobacteria	D_2__Gammaproteobacteria	D_3__Enterobacteriales	D_4__Enterobacteriaceae	D_5__	D_6__
2077	0	0	0	0	0	0	0.00024025	0.000191534	6.77186e-05	0.000274914	0	0.00466226	0.0104888	0.000449186	0.000226578	0	0	0	0	0	0.000243516	0.000450197	0.000401365	0.000386922	0	0	0	0	D_0__Bacteria	D_1__Proteobacteria	D_2__Gammaproteobacteria	D_3__Enterobacteriales	D_4__Enterobacteriaceae	D_5__	D_6__
2085	0	0	0	0.000664562	0.00169047	0.000974421	0.000800833	0.000191534	0.000609467	0.000549828	0.00177276	0.000542123	0	0	0.0020392	0.0024122	6.41272e-05	7.89578e-05	0	0.000101906	0	0	0	9.67305e-05	0.00039557	0.00217588	0.00160901	0.00172607	D_0__Bacteria	D_1__Firmicutes	D_2__Bacilli	D_3__Lactobacillales	D_4__Enterococcaceae	D_5__Enterococcus	D_6__
2086	0.000500375	0	0	0.0868915	0.065844	0.0672351	0.0555778	0.0371576	0.125821	0.0360137	0.187268	0.0421772	0.0671282	0.0604155	0.249122	0.479159	0.0106451	0.00821161	0.0162796	0.00285336	0.00206989	0	0	0.0418843	0.0391614	0.139529	0.108608	0.0907914	D_0__Bacteria	D_1__Firmicutes	D_2__Bacilli	D_3__Lactobacillales	D_4__Enterococcaceae	D_5__Enterococcus	D_6__
2113	0.000250188	0	0	0.000664562	0.000169047	0.000121803	8.00833e-05	0.000287301	6.77186e-05	0	0.00169218	0.000216849	0.00398574	0.00280741	0.000113289	9.64878e-05	0.000641272	0.000236873	0.000227687	0	0	0	0	0	0.00039557	0.00181324	0.00172394	0.00224389	D_0__Bacteria	D_1__Firmicutes	D_2__Clostridia	D_3__Clostridiales	D_4__Clostridiaceae 1	D_5__Clostridium sensu stricto 1	D_6__
2138	0	0	0	0.00299053	0.00194405	0.00645554	0.0052855	0.000574603	0.00446943	0.00549828	0.00177276	0.00314431	0	0	0.00532457	0.00646469	0.00294985	0.00284248	0.00273224	0.00142668	0.00170461	0	0	0.0069646	0.00939478	0	0	0	D_0__Bacteria	D_1__Bacteroidetes	D_2__Bacteroidia	D_3__Bacteroidales	D_4__Bacteroidaceae	D_5__Bacteroides	D_6__
2139	0	0.000245399	0.000147776	0.00124605	0	0.00121803	0.000880916	0.000861904	0.00304734	0.00151203	0.00016116	0.000542123	0	0	0.00124618	0.00106137	0.000448891	0.000157916	0.000455373	0.000305717	0.000852307	0	0	0.000483653	0.00108782	0	0	0	D_0__Bacteria	D_1__Bacteroidetes	D_2__Bacteroidia	D_3__Bacteroidales	D_4__Bacteroidaceae	D_5__Bacteroides	D_6__
2155	0.00250188	0	0	0.0112976	0.0401488	0.00803898	0.0132137	0.0856158	0.0105641	0.0105842	0.00531829	0.0497669	0	0.00449186	0.00328537	0	0.0234064	0.0266088	0.0858379	0.0283298	0	0	0	0.00232153	0.00207674	0.317498	0.148259	0.0769828	D_0__Bacteria	D_1__Firmicutes	D_2__Clostridia	D_3__Clostridiales	D_4__Lachnospiraceae	D_5__[Ruminococcus] torques group	D_6__uncultured bacterium
2157	0	0	0	0.000249211	0.000253571	0	0.000320333	0.00067037	0	0.000412371	0	0.000325274	0	0	0	0	0	0.000157916	0.00364299	0.00214002	0	0	0	0	0	0.00398912	0.000689576	0.000690429	D_0__Bacteria	D_1__Firmicutes	D_2__Clostridia	D_3__Clostridiales	D_4__Lachnospiraceae	D_5__[Ruminococcus] torques group	D_6__
2160	0.000250188	0	0	0.000581492	0.000845237	0.000121803	0.00024025	0.00124497	0.000270874	0.000274914	0.00016116	0.00292746	0	0.000561482	0	0	0.000448891	0.000868535	0.00193534	0.000305717	0	0	0	9.67305e-05	0	0.00398912	0.00206873	0.00155347	D_0__Bacteria	D_1__Firmicutes	D_2__Clostridia	D_3__Clostridiales	D_4__Lachnospiraceae	D_5__[Ruminococcus] torques group	D_6__
2180	0.000250188	0	0	8.30703e-05	8.45237e-05	0.000121803	8.00833e-05	9.57671e-05	0.000203156	0.000687285	8.05802e-05	0.00173479	0.00125865	0.00112296	0.000113289	9.64878e-05	0	0	0	0	0.00255692	0.00213844	0.0017058	0.000290192	0.000197785	0	0	0	D_0__Bacteria	D_1__Proteobacteria	D_2__Gammaproteobacteria	D_3__Enterobacteriales	D_4__Enterobacteriaceae	D_5__Hafnia-Obesumbacterium	D_6__
2181	0.000250188	0	0	0.00132912	0.00194405	0.000365408	0.00200208	0.000957671	0.000609467	0.00123711	0.000483481	0.000433698	0.000419551	0.000449186	0.000679733	0.000964878	0	0	0	0.000101906	0.000852307	0.00112549	0.000802729	0.00116077	0.00138449	0	0	0	D_0__Bacteria	D_1__Proteobacteria	D_2__Gammaproteobacteria	D_3__Enterobacteriales	D_4__Enterobacteriaceae	D_5__Hafnia-Obesumbacterium	D_6__
2182	0	0	0	0.00132912	0.00109881	0.00194884	0.000880916	0.000766137	0.000609467	0.00123711	0.00016116	0.000216849	0.000419551	0.000336889	0.00147275	0.000482439	0	0	0	0	0.00109582	0.000675295	0.00090307	0.00106404	0.00168117	0	0	0	D_0__Bacteria	D_1__Proteobacteria	D_2__Gammaproteobacteria	D_3__Enterobacteriales	D_4__Enterobacteriaceae	D_5__Hafnia-Obesumbacterium	D_6__
2187	0	0	0	0.00323974	0.00490238	0.000730816	0.00104108	0.000766137	0.000812623	0.000824742	0.000241741	0.000216849	0.000419551	0	0.000566444	0.000289464	0	0	0	0.000407623	0.000974066	0.000562746	0.000702388	0.000773844	0.000593354	0	0	0	D_0__Bacteria	D_1__Proteobacteria	D_2__Gammaproteobacteria	D_3__Enterobacteriales	D_4__Enterobacteriaceae	D_5__Hafnia-Obesumbacterium	D_6__
2207	0.00250188	0	0	0.040206	0.0112417	0.00998782	0.0062465	0.0284428	0.00846482	0.00343643	0.230862	0.00477068	0.108874	0.128692	0.00430497	0.00250868	0.0853533	0.0871694	0.0693306	0.000203811	0.00243516	0	0	0.00638421	0.0127571	0.239529	0.489714	0.590403	D_0__Bacteria	D_1__Firmicutes	D_2__Clostridia	D_3__Clostridiales	D_4__Clostridiaceae 1	D_5__Clostridium sensu stricto 1	D_6__
2209	0.000250188	0	0	0	0	0.000121803	0	9.57671e-05	0	0	0	0.000216849	0.00629327	0.00595171	0	0	0.000128254	7.89578e-05	0.000113843	0	0	0	0	0	0	9.06618e-05	0.000344788	0.000258911	D_0__Bacteria	D_1__Firmicutes	D_2__Clostridia	D_3__Clostridiales	D_4__Clostridiaceae 1	D_5__Clostridium sensu stricto 1	D_6__
2216	0.0502877	0	0	0.20942	0.283408	0.280512	0.266437	0.213369	0.179454	0.265704	0.105721	0.26087	0.324103	0.27288	0.269627	0.14396	0	0.000315831	0	0.012942	0.503957	0.37659	0.378186	0.300058	0.263153	0	0	0	D_0__Bacteria	D_1__Proteobacteria	D_2__Gammaproteobacteria	D_3__Enterobacteriales	D_4__Enterobacteriaceae	D_5__Hafnia-Obesumbacterium	D_6__
2217	0.000250188	0	0	0.000913773	0.000929761	0.00133983	0.0004805	0.000287301	0.000541748	0.000412371	0.000644641	0.000975821	0.00104888	0.000898372	0.00090631	0.000289464	0	0	0	0	0.00255692	0.00123804	0.00120409	0.0012575	0.00138449	0	0	0	D_0__Bacteria	D_1__Proteobacteria	D_2__Gammaproteobacteria	D_3__Enterobacteriales	D_4__Enterobacteriaceae	D_5__Hafnia-Obesumbacterium	D_6__
2218	0	0	0	0.000581492	0.00118333	0.000852619	0.00072075	0.000478835	0.000270874	0.000274914	0.00016116	0.000758972	0.000629327	0.000673779	0.000679733	0.000289464	0	0	0	0	0.000852307	0.000337648	0.000501706	0.000677114	0.00118671	0	0	0	D_0__Bacteria	D_1__Proteobacteria	D_2__Gammaproteobacteria	D_3__Enterobacteriales	D_4__Enterobacteriaceae	D_5__Hafnia-Obesumbacterium	D_6__
2219	0.00100075	0	0	0.000581492	0.00160595	0.00133983	0.000800833	0.000574603	0.000677186	0.00109966	0.000564061	0.000758972	0.00104888	0.00112296	0.00090631	9.64878e-05	0	0	0	0	0.0029222	0.00168824	0.00110375	0.00106404	0.000791139	0	0	0	D_0__Bacteria	D_1__Proteobacteria	D_2__Gammaproteobacteria	D_3__Enterobacteriales	D_4__Enterobacteriaceae	D_5__Hafnia-Obesumbacterium	D_6__

## Sheet: Sequences_Taxonomy
samples	Kingdom	Phylum	Class	Order	Family	Genus	Species
1	D_0__Bacteria	D_1__Bacteroidetes	D_2__Bacteroidia	D_3__Bacteroidales	D_4__Prevotellaceae	D_5__Paraprevotella	D_6__uncultured bacterium
3	D_0__Bacteria	D_1__Firmicutes	D_2__Clostridia	D_3__Clostridiales	D_4__Ruminococcaceae	D_5__Ruminococcaceae UCG-013	D_6__uncultured bacterium
9	D_0__Bacteria	D_1__Firmicutes	D_2__Clostridia	D_3__Clostridiales	D_4__Lachnospiraceae	D_5__[Eubacterium] hallii group	D_6__uncultured bacterium
12	D_0__Bacteria	D_1__Bacteroidetes	D_2__Bacteroidia	D_3__Bacteroidales	D_4__Prevotellaceae	D_5__Prevotella 2	D_6__uncultured bacterium
19	D_0__Bacteria	D_1__Actinobacteria	D_2__Coriobacteriia	D_3__Coriobacteriales	D_4__Coriobacteriaceae	D_5__Collinsella	D_6__uncultured bacterium
22	D_0__Bacteria	D_1__Proteobacteria	D_2__Gammaproteobacteria	D_3__Pseudomonadales	D_4__Pseudomonadaceae	D_5__Pseudomonas	D_6__
23	D_0__Bacteria	D_1__Firmicutes	D_2__Clostridia	D_3__Clostridiales	D_4__Lachnospiraceae	D_5__Lachnoclostridium	D_6__
24	D_0__Bacteria	D_1__Firmicutes	D_2__Clostridia	D_3__Clostridiales	D_4__Lachnospiraceae	D_5__Lachnospira	D_6__
25	D_0__Bacteria	D_1__Bacteroidetes	D_2__Bacteroidia	D_3__Bacteroidales	D_4__Porphyromonadaceae	D_5__Butyricimonas	D_6__
27	D_0__Bacteria	D_1__Firmicutes	D_2__Clostridia	D_3__Clostridiales	D_4__Ruminococcaceae	D_5__Ruminiclostridium 6	D_6__uncultured bacterium
43	D_0__Bacteria	D_1__Proteobacteria	D_2__Gammaproteobacteria	D_3__Enterobacteriales	D_4__Enterobacteriaceae	D_5__	D_6__
44	D_0__Bacteria	D_1__Proteobacteria	D_2__Gammaproteobacteria	D_3__Enterobacteriales	D_4__Enterobacteriaceae	D_5__	D_6__
47	D_0__Bacteria	D_1__Firmicutes	D_2__Clostridia	D_3__Clostridiales	D_4__Lachnospiraceae	D_5__Roseburia	D_6__
49	D_0__Bacteria	D_1__Firmicutes	D_2__Clostridia	D_3__Clostridiales	D_4__Lachnospiraceae	D_5__Roseburia	D_6__uncultured bacterium
52	D_0__Bacteria	D_1__Bacteroidetes	D_2__Bacteroidia	D_3__Bacteroidales	D_4__Rikenellaceae	D_5__Alistipes	D_6__
57	D_0__Bacteria	D_1__Firmicutes	D_2__Clostridia	D_3__Clostridiales	D_4__Ruminococcaceae	D_5__	D_6__
67	D_0__Bacteria	D_1__Firmicutes	D_2__Clostridia	D_3__Clostridiales	D_4__Lachnospiraceae	D_5__Blautia	D_6__
75	D_0__Bacteria	D_1__Proteobacteria	D_2__Gammaproteobacteria	D_3__Enterobacteriales	D_4__Enterobacteriaceae	D_5__Hafnia-Obesumbacterium	D_6__
263	D_0__Bacteria	D_1__Bacteroidetes	D_2__Bacteroidia	D_3__Bacteroidales	D_4__Bacteroidaceae	D_5__Bacteroides	D_6__
268	D_0__Bacteria	D_1__Bacteroidetes	D_2__Bacteroidia	D_3__Bacteroidales	D_4__Bacteroidaceae	D_5__Bacteroides	D_6__
270	D_0__Bacteria	D_1__Bacteroidetes	D_2__Bacteroidia	D_3__Bacteroidales	D_4__Bacteroidaceae	D_5__Bacteroides	D_6__
271	D_0__Bacteria	D_1__Bacteroidetes	D_2__Bacteroidia	D_3__Bacteroidales	D_4__Bacteroidaceae	D_5__Bacteroides	D_6__
314	D_0__Bacteria	D_1__Firmicutes	D_2__Clostridia	D_3__Clostridiales	D_4__Ruminococcaceae	D_5__Ruminococcus 2	D_6__uncultured bacterium
371	D_0__Bacteria	D_1__Proteobacteria	D_2__Gammaproteobacteria	D_3__Enterobacteriales	D_4__Enterobacteriaceae	D_5__Hafnia-Obesumbacterium	D_6__
374	D_0__Bacteria	D_1__Proteobacteria	D_2__Gammaproteobacteria	D_3__Enterobacteriales	D_4__Enterobacteriaceae	D_5__Hafnia-Obesumbacterium	D_6__
375	D_0__Bacteria	D_1__Proteobacteria	D_2__Gammaproteobacteria	D_3__Enterobacteriales	D_4__Enterobacteriaceae	D_5__Hafnia-Obesumbacterium	D_6__
417	D_0__Bacteria	D_1__Firmicutes	D_2__Bacilli	D_3__Lactobacillales	D_4__Carnobacteriaceae	D_5__Carnobacterium	D_6__
419	D_0__Bacteria	D_1__Firmicutes	D_2__Clostridia	D_3__Clostridiales	D_4__Peptostreptococcaceae	D_5__	D_6__
454	D_0__Bacteria	D_1__Firmicutes	D_2__Bacilli	D_3__Lactobacillales	D_4__Streptococcaceae	D_5__Streptococcus	D_6__
455	D_0__Bacteria	D_1__Firmicutes	D_2__Negativicutes	D_3__Selenomonadales	D_4__Acidaminococcaceae	D_5__Phascolarctobacterium	D_6__uncultured bacterium
456	D_0__Bacteria	D_1__Bacteroidetes	D_2__Bacteroidia	D_3__Bacteroidales	D_4__Rikenellaceae	D_5__Alistipes	D_6__
509	D_0__Bacteria	D_1__Firmicutes	D_2__Clostridia	D_3__Clostridiales	D_4__Lachnospiraceae	D_5__	D_6__
510	D_0__Bacteria	D_1__Firmicutes	D_2__Clostridia	D_3__Clostridiales	D_4__Lachnospiraceae	D_5__	D_6__
546	D_0__Bacteria	D_1__Bacteroidetes	D_2__Bacteroidia	D_3__Bacteroidales	D_4__Bacteroidaceae	D_5__Bacteroides	D_6__
547	D_0__Bacteria	D_1__Firmicutes	D_2__Clostridia	D_3__Clostridiales	D_4__Lachnospiraceae	D_5__[Eubacterium] fissicatena group	D_6__
623	D_0__Bacteria	D_1__Bacteroidetes	D_2__Bacteroidia	D_3__Bacteroidales	D_4__Porphyromonadaceae	D_5__Odoribacter	D_6__
626	D_0__Bacteria	D_1__Bacteroidetes	D_2__Bacteroidia	D_3__Bacteroidales	D_4__Porphyromonadaceae	D_5__Odoribacter	D_6__
665	D_0__Bacteria	D_1__Proteobacteria	D_2__Gammaproteobacteria	D_3__Enterobacteriales	D_4__Enterobacteriaceae	D_5__Hafnia-Obesumbacterium	D_6__
666	D_0__Bacteria	D_1__Proteobacteria	D_2__Gammaproteobacteria	D_3__Enterobacteriales	D_4__Enterobacteriaceae	D_5__Hafnia-Obesumbacterium	D_6__
699	D_0__Bacteria	D_1__Bacteroidetes	D_2__Bacteroidia	D_3__Bacteroidales	D_4__Bacteroidaceae	D_5__Bacteroides	D_6__
733	D_0__Bacteria	D_1__Bacteroidetes	D_2__Bacteroidia	D_3__Bacteroidales	D_4__Rikenellaceae	D_5__Alistipes	D_6__
735	D_0__Bacteria	D_1__Firmicutes	D_2__Clostridia	D_3__Clostridiales	D_4__Lachnospiraceae	D_5__[Eubacterium] ruminantium group	D_6__uncultured bacterium
764	D_0__Bacteria	D_1__Proteobacteria	D_2__Gammaproteobacteria	D_3__Enterobacteriales	D_4__Enterobacteriaceae	D_5__	D_6__
766	D_0__Bacteria	D_1__Proteobacteria	D_2__Gammaproteobacteria	D_3__Enterobacteriales	D_4__Enterobacteriaceae	D_5__	D_6__
768	D_0__Bacteria	D_1__Proteobacteria	D_2__Gammaproteobacteria	D_3__Enterobacteriales	D_4__Enterobacteriaceae	D_5__	D_6__
770	D_0__Bacteria	D_1__Proteobacteria	D_2__Gammaproteobacteria	D_3__Enterobacteriales	D_4__Enterobacteriaceae	D_5__	D_6__
775	D_0__Bacteria	D_1__Proteobacteria	D_2__Gammaproteobacteria	D_3__Enterobacteriales	D_4__Enterobacteriaceae	D_5__Serratia	D_6__
778	D_0__Bacteria	D_1__Proteobacteria	D_2__Gammaproteobacteria	D_3__Enterobacteriales	D_4__Enterobacteriaceae	D_5__	D_6__
810	D_0__Bacteria	D_1__Bacteroidetes	D_2__Bacteroidia	D_3__Bacteroidales	D_4__Bacteroidaceae	D_5__Bacteroides	D_6__
813	D_0__Bacteria	D_1__Firmicutes	D_2__Clostridia	D_3__Clostridiales	D_4__Lachnospiraceae	D_5__Lachnoclostridium	D_6__
850	D_0__Bacteria	D_1__Firmicutes	D_2__Bacilli	D_3__Lactobacillales	D_4__Lactobacillaceae	D_5__Lactobacillus	D_6__uncultured bacterium
853	D_0__Bacteria	D_1__Firmicutes	D_2__Bacilli	D_3__Lactobacillales	D_4__Enterococcaceae	D_5__Enterococcus	D_6__
885	D_0__Bacteria	D_1__Firmicutes	D_2__Clostridia	D_3__Clostridiales	D_4__Ruminococcaceae	D_5__Ruminococcaceae UCG-014	D_6__uncultured bacterium
887	D_0__Bacteria	D_1__Firmicutes	D_2__Clostridia	D_3__Clostridiales	D_4__Clostridiaceae 1	D_5__Clostridium sensu stricto 1	D_6__
888	D_0__Bacteria	D_1__Firmicutes	D_2__Clostridia	D_3__Clostridiales	D_4__Clostridiaceae 1	D_5__Clostridium sensu stricto 1	D_6__
937	D_0__Bacteria	D_1__Firmicutes	D_2__Clostridia	D_3__Clostridiales	D_4__Ruminococcaceae	D_5__Ruminiclostridium 6	D_6__
967	D_0__Bacteria	D_1__Bacteroidetes	D_2__Bacteroidia	D_3__Bacteroidales	D_4__Porphyromonadaceae	D_5__Parabacteroides	D_6__
971	D_0__Bacteria	D_1__Firmicutes	D_2__Clostridia	D_3__Clostridiales	D_4__Ruminococcaceae	D_5__Faecalibacterium	D_6__uncultured bacterium
976	D_0__Bacteria	D_1__Bacteroidetes	D_2__Bacteroidia	D_3__Bacteroidales	D_4__Rikenellaceae	D_5__Alistipes	D_6__
1017	D_0__Bacteria	D_1__Firmicutes	D_2__Clostridia	D_3__Clostridiales	D_4__Lachnospiraceae	D_5__Lachnoclostridium	D_6__
1069	D_0__Bacteria	D_1__Firmicutes	D_2__Erysipelotrichia	D_3__Erysipelotrichales	D_4__Erysipelotrichaceae	D_5__Erysipelotrichaceae UCG-003	D_6__uncultured bacterium
1070	D_0__Bacteria	D_1__Firmicutes	D_2__Bacilli	D_3__Bacillales	D_4__Bacillaceae	D_5__Bacillus	D_6__
1109	D_0__Bacteria	D_1__Bacteroidetes	D_2__Bacteroidia	D_3__Bacteroidales	D_4__Rikenellaceae	D_5__Alistipes	D_6__
1110	D_0__Bacteria	D_1__Firmicutes	D_2__Clostridia	D_3__Clostridiales	D_4__Lachnospiraceae	D_5__Blautia	D_6__uncultured bacterium
1113	D_0__Bacteria	D_1__Firmicutes	D_2__Clostridia	D_3__Clostridiales	D_4__Lachnospiraceae	D_5__Lachnospiraceae UCG-003	D_6__uncultured bacterium
1117	D_0__Bacteria	D_1__Firmicutes	D_2__Clostridia	D_3__Clostridiales	D_4__Lachnospiraceae	D_5__Blautia	D_6__uncultured bacterium
1174	D_0__Bacteria	D_1__Bacteroidetes	D_2__Bacteroidia	D_3__Bacteroidales	D_4__Bacteroidaceae	D_5__Bacteroides	D_6__
1178	D_0__Bacteria	D_1__Firmicutes	D_2__Clostridia	D_3__Clostridiales	D_4__Lachnospiraceae	D_5__Coprococcus 2	D_6__uncultured bacterium
1185	D_0__Bacteria	D_1__Firmicutes	D_2__Clostridia	D_3__Clostridiales	D_4__Ruminococcaceae	D_5__Subdoligranulum	D_6__uncultured bacterium
1226	D_0__Bacteria	D_1__Bacteroidetes	D_2__Bacteroidia	D_3__Bacteroidales	D_4__Rikenellaceae	D_5__Alistipes	D_6__
1227	D_0__Bacteria	D_1__Firmicutes	D_2__Clostridia	D_3__Clostridiales	D_4__Lachnospiraceae	D_5__Sellimonas	D_6__
1230	D_0__Bacteria	D_1__Bacteroidetes	D_2__Bacteroidia	D_3__Bacteroidales	D_4__Bacteroidaceae	D_5__Bacteroides	D_6__
1231	D_0__Bacteria	D_1__Firmicutes	D_2__Clostridia	D_3__Clostridiales	D_4__Lachnospiraceae	D_5__Roseburia	D_6__
1234	D_0__Bacteria	D_1__Bacteroidetes	D_2__Bacteroidia	D_3__Bacteroidales	D_4__Rikenellaceae	D_5__Alistipes	D_6__uncultured bacterium
1241	D_0__Bacteria	D_1__Firmicutes	D_2__Clostridia	D_3__Clostridiales	D_4__Ruminococcaceae	D_5__Subdoligranulum	D_6__uncultured bacterium
1279	D_0__Bacteria	D_1__Firmicutes	D_2__Clostridia	D_3__Clostridiales	D_4__Lachnospiraceae	D_5__	D_6__
1341	D_0__Bacteria	D_1__Bacteroidetes	D_2__Bacteroidia	D_3__Bacteroidales	D_4__Bacteroidaceae	D_5__Bacteroides	D_6__
1343	D_0__Bacteria	D_1__Bacteroidetes	D_2__Bacteroidia	D_3__Bacteroidales	D_4__Bacteroidaceae	D_5__Bacteroides	D_6__
1344	D_0__Bacteria	D_1__Bacteroidetes	D_2__Bacteroidia	D_3__Bacteroidales	D_4__Bacteroidaceae	D_5__Bacteroides	D_6__
1372	D_0__Bacteria	D_1__Firmicutes	D_2__Clostridia	D_3__Clostridiales	D_4__Ruminococcaceae	D_5__Flavonifractor	D_6__
1373	D_0__Bacteria	D_1__Firmicutes	D_2__Clostridia	D_3__Clostridiales	D_4__Ruminococcaceae	D_5__	D_6__
1385	D_0__Bacteria	D_1__Bacteroidetes	D_2__Bacteroidia	D_3__Bacteroidales	D_4__Porphyromonadaceae	D_5__Parabacteroides	D_6__
1386	D_0__Bacteria	D_1__Bacteroidetes	D_2__Bacteroidia	D_3__Bacteroidales	D_4__Porphyromonadaceae	D_5__Parabacteroides	D_6__
1387	D_0__Bacteria	D_1__Bacteroidetes	D_2__Bacteroidia	D_3__Bacteroidales	D_4__Porphyromonadaceae	D_5__Parabacteroides	D_6__
1391	D_0__Bacteria	D_1__Bacteroidetes	D_2__Bacteroidia	D_3__Bacteroidales	D_4__Porphyromonadaceae	D_5__Parabacteroides	D_6__
1417	D_0__Bacteria	D_1__Proteobacteria	D_2__Gammaproteobacteria	D_3__Enterobacteriales	D_4__Enterobacteriaceae	D_5__Hafnia-Obesumbacterium	D_6__
1418	D_0__Bacteria	D_1__Proteobacteria	D_2__Gammaproteobacteria	D_3__Enterobacteriales	D_4__Enterobacteriaceae	D_5__Hafnia-Obesumbacterium	D_6__
1421	D_0__Bacteria	D_1__Proteobacteria	D_2__Gammaproteobacteria	D_3__Enterobacteriales	D_4__Enterobacteriaceae	D_5__Hafnia-Obesumbacterium	D_6__
1429	D_0__Bacteria	D_1__Proteobacteria	D_2__Gammaproteobacteria	D_3__Enterobacteriales	D_4__Enterobacteriaceae	D_5__Hafnia-Obesumbacterium	D_6__
1459	D_0__Bacteria	D_1__Proteobacteria	D_2__Gammaproteobacteria	D_3__Enterobacteriales	D_4__Enterobacteriaceae	D_5__Hafnia-Obesumbacterium	D_6__
1460	D_0__Bacteria	D_1__Proteobacteria	D_2__Gammaproteobacteria	D_3__Enterobacteriales	D_4__Enterobacteriaceae	D_5__Hafnia-Obesumbacterium	D_6__
1482	D_0__Bacteria	D_1__Proteobacteria	D_2__Gammaproteobacteria	D_3__Enterobacteriales	D_4__Enterobacteriaceae	D_5__Hafnia-Obesumbacterium	D_6__
1484	D_0__Bacteria	D_1__Proteobacteria	D_2__Gammaproteobacteria	D_3__Enterobacteriales	D_4__Enterobacteriaceae	D_5__Hafnia-Obesumbacterium	D_6__
1507	D_0__Bacteria	D_1__Bacteroidetes	D_2__Bacteroidia	D_3__Bacteroidales	D_4__Porphyromonadaceae	D_5__Parabacteroides	D_6__
1508	D_0__Bacteria	D_1__Bacteroidetes	D_2__Bacteroidia	D_3__Bacteroidales	D_4__Porphyromonadaceae	D_5__Parabacteroides	D_6__
1510	D_0__Bacteria	D_1__Bacteroidetes	D_2__Bacteroidia	D_3__Bacteroidales	D_4__Porphyromonadaceae	D_5__Parabacteroides	D_6__
1511	D_0__Bacteria	D_1__Bacteroidetes	D_2__Bacteroidia	D_3__Bacteroidales	D_4__Porphyromonadaceae	D_5__Parabacteroides	D_6__
1538	D_0__Bacteria	D_1__Firmicutes	D_2__Clostridia	D_3__Clostridiales	D_4__Lachnospiraceae	D_5__[Eubacterium] eligens group	D_6__
1539	D_0__Bacteria	D_1__Firmicutes	D_2__Clostridia	D_3__Clostridiales	D_4__Lachnospiraceae	D_5__[Eubacterium] eligens group	D_6__uncultured bacterium
1572	D_0__Bacteria	D_1__Bacteroidetes	D_2__Bacteroidia	D_3__Bacteroidales	D_4__Bacteroidaceae	D_5__Bacteroides	D_6__
1574	D_0__Bacteria	D_1__Bacteroidetes	D_2__Bacteroidia	D_3__Bacteroidales	D_4__Bacteroidaceae	D_5__Bacteroides	D_6__
1581	D_0__Bacteria	D_1__Bacteroidetes	D_2__Bacteroidia	D_3__Bacteroidales	D_4__Bacteroidaceae	D_5__Bacteroides	D_6__uncultured bacterium
1583	D_0__Bacteria	D_1__Bacteroidetes	D_2__Bacteroidia	D_3__Bacteroidales	D_4__Bacteroidaceae	D_5__Bacteroides	D_6__
1610	D_0__Bacteria	D_1__Proteobacteria	D_2__Gammaproteobacteria	D_3__Enterobacteriales	D_4__Enterobacteriaceae	D_5__	D_6__
1611	D_0__Bacteria	D_1__Proteobacteria	D_2__Gammaproteobacteria	D_3__Enterobacteriales	D_4__Enterobacteriaceae	D_5__	D_6__
1614	D_0__Bacteria	D_1__Proteobacteria	D_2__Gammaproteobacteria	D_3__Enterobacteriales	D_4__Enterobacteriaceae	D_5__	D_6__
1619	D_0__Bacteria	D_1__Proteobacteria	D_2__Gammaproteobacteria	D_3__Enterobacteriales	D_4__Enterobacteriaceae	D_5__Serratia	D_6__
1643	D_0__Bacteria	D_1__Proteobacteria	D_2__Gammaproteobacteria	D_3__Alteromonadales	D_4__Shewanellaceae	D_5__Shewanella	D_6__
1644	D_0__Bacteria	D_1__Proteobacteria	D_2__Gammaproteobacteria	D_3__Enterobacteriales	D_4__Enterobacteriaceae	D_5__	D_6__
1665	D_0__Bacteria	D_1__Firmicutes	D_2__Bacilli	D_3__Lactobacillales	D_4__Enterococcaceae	D_5__Enterococcus	D_6__
1670	D_0__Bacteria	D_1__Firmicutes	D_2__Bacilli	D_3__Lactobacillales	D_4__Enterococcaceae	D_5__Enterococcus	D_6__
1705	D_0__Bacteria	D_1__Firmicutes	D_2__Clostridia	D_3__Clostridiales	D_4__Clostridiaceae 1	D_5__Clostridium sensu stricto 1	D_6__
1706	D_0__Bacteria	D_1__Firmicutes	D_2__Clostridia	D_3__Clostridiales	D_4__Clostridiaceae 1	D_5__Clostridium sensu stricto 1	D_6__
1738	D_0__Bacteria	D_1__Firmicutes	D_2__Clostridia	D_3__Clostridiales	D_4__Eubacteriaceae	D_5__Eubacterium	D_6__
1741	D_0__Bacteria	D_1__Firmicutes	D_2__Clostridia	D_3__Clostridiales	D_4__Eubacteriaceae	D_5__Eubacterium	D_6__
1742	D_0__Bacteria	D_1__Firmicutes	D_2__Clostridia	D_3__Clostridiales	D_4__Eubacteriaceae	D_5__Eubacterium	D_6__
1759	D_0__Bacteria	D_1__Firmicutes	D_2__Clostridia	D_3__Clostridiales	D_4__Lachnospiraceae	D_5__Lachnoclostridium	D_6__
1760	D_0__Bacteria	D_1__Firmicutes	D_2__Clostridia	D_3__Clostridiales	D_4__Lachnospiraceae	D_5__Lachnoclostridium	D_6__
1784	D_0__Bacteria	D_1__Bacteroidetes	D_2__Bacteroidia	D_3__Bacteroidales	D_4__Bacteroidaceae	D_5__Bacteroides	D_6__
1786	D_0__Bacteria	D_1__Bacteroidetes	D_2__Bacteroidia	D_3__Bacteroidales	D_4__Bacteroidaceae	D_5__Bacteroides	D_6__
1805	D_0__Bacteria	D_1__Bacteroidetes	D_2__Bacteroidia	D_3__Bacteroidales	D_4__Bacteroidaceae	D_5__Bacteroides	D_6__
1806	D_0__Bacteria	D_1__Bacteroidetes	D_2__Bacteroidia	D_3__Bacteroidales	D_4__Bacteroidaceae	D_5__Bacteroides	D_6__
1807	D_0__Bacteria	D_1__Bacteroidetes	D_2__Bacteroidia	D_3__Bacteroidales	D_4__Bacteroidaceae	D_5__Bacteroides	D_6__
1808	D_0__Bacteria	D_1__Bacteroidetes	D_2__Bacteroidia	D_3__Bacteroidales	D_4__Bacteroidaceae	D_5__Bacteroides	D_6__uncultured bacterium
1841	D_0__Bacteria	D_1__Firmicutes	D_2__Clostridia	D_3__Clostridiales	D_4__Lachnospiraceae	D_5__[Ruminococcus] torques group	D_6__
1876	D_0__Bacteria	D_1__Firmicutes	D_2__Clostridia	D_3__Clostridiales	D_4__Lachnospiraceae	D_5__Fusicatenibacter	D_6__uncultured bacterium
1879	D_0__Bacteria	D_1__Firmicutes	D_2__Clostridia	D_3__Clostridiales	D_4__Lachnospiraceae	D_5__Lachnospiraceae NK4A136 group	D_6__uncultured bacterium
1896	D_0__Bacteria	D_1__Firmicutes	D_2__Clostridia	D_3__Clostridiales	D_4__Ruminococcaceae	D_5__Faecalibacterium	D_6__uncultured bacterium
1897	D_0__Bacteria	D_1__Firmicutes	D_2__Clostridia	D_3__Clostridiales	D_4__Ruminococcaceae	D_5__Faecalibacterium	D_6__uncultured bacterium
1919	D_0__Bacteria	D_1__Bacteroidetes	D_2__Bacteroidia	D_3__Bacteroidales	D_4__Rikenellaceae	D_5__Alistipes	D_6__uncultured bacterium
1920	D_0__Bacteria	D_1__Bacteroidetes	D_2__Bacteroidia	D_3__Bacteroidales	D_4__Rikenellaceae	D_5__Alistipes	D_6__
1938	D_0__Bacteria	D_1__Firmicutes	D_2__Clostridia	D_3__Clostridiales	D_4__Lachnospiraceae	D_5__[Eubacterium] rectale group	D_6__uncultured bacterium
1940	D_0__Bacteria	D_1__Firmicutes	D_2__Clostridia	D_3__Clostridiales	D_4__Lachnospiraceae	D_5__	D_6__
1964	D_0__Bacteria	D_1__Bacteroidetes	D_2__Bacteroidia	D_3__Bacteroidales	D_4__Porphyromonadaceae	D_5__Barnesiella	D_6__
1965	D_0__Bacteria	D_1__Bacteroidetes	D_2__Bacteroidia	D_3__Bacteroidales	D_4__Porphyromonadaceae	D_5__Barnesiella	D_6__
1979	D_0__Bacteria	D_1__Bacteroidetes	D_2__Bacteroidia	D_3__Bacteroidales	D_4__Porphyromonadaceae	D_5__Barnesiella	D_6__
1980	D_0__Bacteria	D_1__Bacteroidetes	D_2__Bacteroidia	D_3__Bacteroidales	D_4__Porphyromonadaceae	D_5__Barnesiella	D_6__
1990	D_0__Bacteria	D_1__Bacteroidetes	D_2__Bacteroidia	D_3__Bacteroidales	D_4__Bacteroidaceae	D_5__Bacteroides	D_6__uncultured organism
1993	D_0__Bacteria	D_1__Bacteroidetes	D_2__Bacteroidia	D_3__Bacteroidales	D_4__Bacteroidaceae	D_5__Bacteroides	D_6__
2012	D_0__Bacteria	D_1__Proteobacteria	D_2__Gammaproteobacteria	D_3__Enterobacteriales	D_4__Enterobacteriaceae	D_5__Hafnia-Obesumbacterium	D_6__
2016	D_0__Bacteria	D_1__Proteobacteria	D_2__Gammaproteobacteria	D_3__Enterobacteriales	D_4__Enterobacteriaceae	D_5__Hafnia-Obesumbacterium	D_6__
2017	D_0__Bacteria	D_1__Proteobacteria	D_2__Gammaproteobacteria	D_3__Enterobacteriales	D_4__Enterobacteriaceae	D_5__Hafnia-Obesumbacterium	D_6__
2024	D_0__Bacteria	D_1__Proteobacteria	D_2__Gammaproteobacteria	D_3__Enterobacteriales	D_4__Enterobacteriaceae	D_5__Hafnia-Obesumbacterium	D_6__
2043	D_0__Bacteria	D_1__Bacteroidetes	D_2__Bacteroidia	D_3__Bacteroidales	D_4__Porphyromonadaceae	D_5__Parabacteroides	D_6__
2048	D_0__Bacteria	D_1__Bacteroidetes	D_2__Bacteroidia	D_3__Bacteroidales	D_4__Porphyromonadaceae	D_5__Parabacteroides	D_6__
2065	D_0__Bacteria	D_1__Proteobacteria	D_2__Gammaproteobacteria	D_3__Enterobacteriales	D_4__Enterobacteriaceae	D_5__	D_6__
2072	D_0__Bacteria	D_1__Proteobacteria	D_2__Gammaproteobacteria	D_3__Enterobacteriales	D_4__Enterobacteriaceae	D_5__	D_6__
2077	D_0__Bacteria	D_1__Proteobacteria	D_2__Gammaproteobacteria	D_3__Enterobacteriales	D_4__Enterobacteriaceae	D_5__	D_6__
2085	D_0__Bacteria	D_1__Firmicutes	D_2__Bacilli	D_3__Lactobacillales	D_4__Enterococcaceae	D_5__Enterococcus	D_6__
2086	D_0__Bacteria	D_1__Firmicutes	D_2__Bacilli	D_3__Lactobacillales	D_4__Enterococcaceae	D_5__Enterococcus	D_6__
2113	D_0__Bacteria	D_1__Firmicutes	D_2__Clostridia	D_3__Clostridiales	D_4__Clostridiaceae 1	D_5__Clostridium sensu stricto 1	D_6__
2138	D_0__Bacteria	D_1__Bacteroidetes	D_2__Bacteroidia	D_3__Bacteroidales	D_4__Bacteroidaceae	D_5__Bacteroides	D_6__
2139	D_0__Bacteria	D_1__Bacteroidetes	D_2__Bacteroidia	D_3__Bacteroidales	D_4__Bacteroidaceae	D_5__Bacteroides	D_6__
2155	D_0__Bacteria	D_1__Firmicutes	D_2__Clostridia	D_3__Clostridiales	D_4__Lachnospiraceae	D_5__[Ruminococcus] torques group	D_6__uncultured bacterium
2157	D_0__Bacteria	D_1__Firmicutes	D_2__Clostridia	D_3__Clostridiales	D_4__Lachnospiraceae	D_5__[Ruminococcus] torques group	D_6__
2160	D_0__Bacteria	D_1__Firmicutes	D_2__Clostridia	D_3__Clostridiales	D_4__Lachnospiraceae	D_5__[Ruminococcus] torques group	D_6__
2180	D_0__Bacteria	D_1__Proteobacteria	D_2__Gammaproteobacteria	D_3__Enterobacteriales	D_4__Enterobacteriaceae	D_5__Hafnia-Obesumbacterium	D_6__
2181	D_0__Bacteria	D_1__Proteobacteria	D_2__Gammaproteobacteria	D_3__Enterobacteriales	D_4__Enterobacteriaceae	D_5__Hafnia-Obesumbacterium	D_6__
2182	D_0__Bacteria	D_1__Proteobacteria	D_2__Gammaproteobacteria	D_3__Enterobacteriales	D_4__Enterobacteriaceae	D_5__Hafnia-Obesumbacterium	D_6__
2187	D_0__Bacteria	D_1__Proteobacteria	D_2__Gammaproteobacteria	D_3__Enterobacteriales	D_4__Enterobacteriaceae	D_5__Hafnia-Obesumbacterium	D_6__
2207	D_0__Bacteria	D_1__Firmicutes	D_2__Clostridia	D_3__Clostridiales	D_4__Clostridiaceae 1	D_5__Clostridium sensu stricto 1	D_6__
2209	D_0__Bacteria	D_1__Firmicutes	D_2__Clostridia	D_3__Clostridiales	D_4__Clostridiaceae 1	D_5__Clostridium sensu stricto 1	D_6__
2216	D_0__Bacteria	D_1__Proteobacteria	D_2__Gammaproteobacteria	D_3__Enterobacteriales	D_4__Enterobacteriaceae	D_5__Hafnia-Obesumbacterium	D_6__
2217	D_0__Bacteria	D_1__Proteobacteria	D_2__Gammaproteobacteria	D_3__Enterobacteriales	D_4__Enterobacteriaceae	D_5__Hafnia-Obesumbacterium	D_6__
2218	D_0__Bacteria	D_1__Proteobacteria	D_2__Gammaproteobacteria	D_3__Enterobacteriales	D_4__Enterobacteriaceae	D_5__Hafnia-Obesumbacterium	D_6__
2219	D_0__Bacteria	D_1__Proteobacteria	D_2__Gammaproteobacteria	D_3__Enterobacteriales	D_4__Enterobacteriaceae	D_5__Hafnia-Obesumbacterium	D_6__

## Sheet: Sequences
>_000002216
CCTGTTTGCTCCCCACGCTTTCGCACCTGAGCGTCAGTCTTTGTCCAGGGGGCCGCCTTCGCCACCGGTATTCCTCCAGATCTCTACGCATTTCACCGCTACACCTGGAATTCTACCCCCCTCTACAAGACTCTAGCTGACCAGTTTCAAATGCAGTTCCCAAGTTAAGCTCGGGGATTTCACATCTGACTTAATCAACCGCCTGCGTGCGCTTTACGCCCAGTAATTCCGATTAACGCTTGCACCCTCCGTA----
>_000002207
CCTGTTTGCTCCCCACGCTTTCGAGCCTCAGCGTCAGTTACAGTCCAGAGAGTCGCCTTCGCCACTGGTGTTCTTCCTAATCTCTACGCATTTCACCGCTACACTAGGAATTCCACTCTCCTCTCCTGCACTCTAGATAACCAGTTTGGAATGCAGCACCCAAGTTGAGCCCGGGTATTTCACATCCCACTTAATCATCCGCCTACGCTCCCTTTACGCCCAGTAAATCCGGATAACGCTCGCCACCTACGTA----
>_000002086
CCTGTTTGCTCCCCACGCTTTCGAGCCTCAGCGTCAGTTACAGACCAGAGAGCCGCCTTCGCCACTGGTGTTCCTCCATATATCTACGCATTTCACCGCTACACATGGAATTCCACTCTCCTCTTCTGCACTCAAGTCTCCCAGTTTCCAATGACCCTCCCCGGTTGAGCCGGGGGCTTTCACATCAGACTTAAGAAACCGCCTGCGCTCGCTTTACGCCCAATAAATCCGGACAACGCTTGCCACCTACGTA----
>_000002065
CCTGTTTGCTCCCCACGCTTTCGCACCTGAGCGTCAGTCTTTGTCCAGGGGGCCGCCTTCGCCACCGGTATTCCTCCAGATCTCTACGCATTTCACCGCTACACCTGGAATTCTACCCCCCTCTACAAGACTCTAGCTTGCCAGTTTCAAATGCAGTTCCCAAGTTAAGCTCGGGGATTTCACATCTGACTTAACAAACCGCCTGCGTGCGCTTTACGCCCAGTAATTCCGATTAACGCTTGCACCCTCCGTA----
>_000001990
CCTGTTTGATACCCACACTTTCGAGCCTCAATGTCAGTTGCAGCTTAGCAGGCTGCCTTCGCAATCGGAGTTCTTCGTGATATCTAAGCATTTCACCGCTACACCACGAATTCCGCCTGCCTCAACTGCACTCAAGATATCCAGTATCAACTGCAATTTTACGGTTGAGCCGCAAACTTTCACAACTGACTTAAACATCCATCTACGCTCCCTTTAAACCCAATAAATCCGGATAACGCTCGGATCCTCCGTA----
>_000002043
CCTGTTTGATCCCCACGCTTTCGTGCTTCAGTGTCAGTTATGGTTTAGTAAGCTGCCTTCGCAATCGGAGTTCTGCGTGATATCTATGCATTTCACCGCTACACCACGCATTCCGCCTACCTCAAACACACTCAAGTAACCCAGTTTCAACGGCAATTTTATGGTTGAGCCACAAACTTTCACCGCTGACTTAAATCACCACCTACGCACCCTTTAAACCCAATAAATCCGGATAACGCTCGCATCCTCCGTA----
>_000001581
CCTGTTTGATACCCACACTTTCGAGCATCAGCGTCAGTTACAGTCCAGCAAGCTGCCTTCGCAATCGGAGTTCTTCGTGATATCTAAGCATTTCACCGCTACACCACGAATTCCGCCTGCCTCTACTGTACTCAAGACACCCAGTATCAACTGCAATTTTACGGTTGAGCCGCAAACTTTCACAACTGACTTAAGCGTCCGCCTACGCTCCCTTTAAACCCAATAAATCCGGATAACGCTCGGATCCTCCGTA----
>_000002155
CCTGTTTGCTCCCCACGCTTTCGAGCCTCAACGTCAGTTACCGTCCAGTAAGCCGCCTTCGCCACTGGTGTTCCTCCTAATATCTACGCATTTCACCGCTACACTAGGAATTCCGCTTACCTCTCCGGTACTCTAGATTGACAGTTTCCAATGCAGTCCCGGGGTTGAGCCCCGGGTTTTCACATCAGACTTGCCACTCCGTCTACGCTCCCTTTACACCCAGTAAATCCGGATAACGCTTGCACCATACGTA----
>_000001784
CCTGTTTGATACCCACACTTTCGAGCATCAGCGTCAGTTACAGTCCAGTAAGCTGCCTTCGCAATCGGAGTTCTTCGTGATATCTAAGCATTTCACCGCTACACCACGAATTCCGCCTACCTCTGCTGCACTCAAGACTACCAGTATCAACTGCAATTTTACGGTTGAGCCGCAAACTTTCACAACTGACTTAATAATCCGCCTACGCTCCCTTTAAACCCAATAAATCCGGATAACGCTCGGATCCTCCGTA----
>_000000699
CCTGTTTGATACCCACACTTTCGAGCATCAGCGTCAGTTACAGTCCAGCAGGCTGCCTTCGCAATCGGAGTTCTTCGTGATATCTAAGCATTTCACCGCTACACCACGAATTCCGCCTGCCTCTACTGTACTCAAGACACCCAGTATCAACTGCAATTTTACGGTTGAGCCGCAAACTTTCACAACTGACTTAAGCGTCCGCCTACGCTCCCTTTAAACCCAATAAATCCGGATAACGCTCGGATCCTCCGTA----
>_000001279
CCTGTTTGCTCCCCACGCTTTCGAGCCTCAACGTCAGTCATCGTCCAGCAAGCCGCCTTCGCCACTGGTGTTCCTCCTAATATCTACGCATTTCACCGCTACACTAGGAATTCCACTTGCCTCTCCGACACTCTAGCTCAGCAGTTCCAAATGCAGTCCCGGGGTTGAGCCCCGGGCTTTCACATCTGGCTTGCCGTGCCGTCTACGCTCCCTTTACACCCAGTAAATCCGGATAACGCTTGCCCCCTACGTA----
>_000000019
CCTGTTCGCTCCCCCAGCTTTCGCGCCTCAGCGTCGGTCTCGGCCCAGAGGGCCGCCTTCGCCACCGGTGTTCCACCCGATATCTGCGCATTCCACCGCTACACCGGGTGTTCCACCCTCCCCTACCGGACCCAAGCCGCGGAGGTTCCGGGGGCTTCGGGGGGTTGAGCCCCCCGCTTCGACCCCCGGCCTGCCGGGCCGCCTACGCGCGCTTTACGCCCAATGAATCCGGATAACGCTCGCCCCCTACGTA----
>_000000509
CCTGTTTGCTCCCCACGCTTTCGAGCCTCAACGTCAGTCATCGTCCAGTAAGCCGCCTTCGCCACTGGTGTTCCTCCCAATATCTACGCATTTCACCGCTACACTGGGAATTCCACTTACCTCTCCGACACTCTAGCTGCATAGTTTCCAAAGCAGTCCCGGGGTTGAGCCCCGGGCTTTCACTTCAGACTTACACAGCCGTCTACGCTCCCTTTACACCCAGTAAATCCGGATAACGCTTGCACCATACGTA----
>_000000314
CCTGTTTGCTACCCACGCTTTCGTGCCTCAGCGTCAGTTAAAGCCCAGCAGGCCGCCTTCGCCACTGGTGTTCCTCCCCATCTCTACGCATTTCACCGCTACACGGGGAATTCCGCCTGCCTCTACTTCACTCAAGCTCTACAGTTTCAAATGCAGTTTATGGGTTGAGCCCATAGATTTCACATCTGACTTGCAAAGCCGCCTACGCACCCTTTACACCCAGTAAATCCGGACAACGCTTGCTCCCTACGTA----
>_000000766
CCTGTTTGCTCCCCACGCTTTCGCACCTGAGCGTCAGTCTTTGTCCAGGGGGCCGCCTTCGCCACCGGTATTCCTCCAGATCTCTACGCATTTCACCGCTACACCTGGAATTCTACCCCCCTCTACAAGACTCTAGCTTGCCAGTTTCAAATGCAGTTCCCAAGTTAAGCTCGGGGATTTCACATCTGACTTAACAAACCGCCTGAGTGCGCTTTACGCCCAGTAATTCCGATTAACGCTTGCACCCTCCGTA----
>_000001385
CCTGTTTGATCCCCACGCTTTCGTGCATCAGCGTCAGTCATGGCTTGGCAGGCTGCCTTCGCAATCGGGGTTCTGCGTGATATCTAAGCATTTCACCGCTACACCACGCATTCCGCCTGCCTCAAACATACTCAAGCCCCCCAGTTTCAACGGCAATTCTATGGTTGAGCCACAGACTTTCACCGCTGACTTAAAAGGCCGCCTACGCACCCTTTAAACCCAATAAATCCGGATAACGCTCGGATCCTCCGTA----
>_000000263
CCTGTTTGATACCCACACTTTCGAGCCTCAATGTCAGTCGCAGATTAGCAGGCTGCCTTCGCAATCGGAGTTCTTCGTGATATCTAAGCATTTCACCGCTACACCACGAATTCCGCCTGCCTCAACTGAACTCAAGACATCCAGTATCAACTGCAATTTTACGGTTGAGCCGCAAACTTTCACAACTGACTTAAACATCCATCTACGCTCCCTTTAAACCCAATAAATCCGGATAACGCTCGGATCCTCCGTA----
>_000000810
CCTGTTTGATACCCACACTTTCGAGCATCAGCGTCAGTTACAGTCCAGTAAGCTGCCTTCGCAATCGGAGTTCTTCGTGATATCTAAGCATTTCACCGCTACACCACGAATTCCGCCTACCTATGCTGCACTCAAGGTACCCAGTATCAACTGCAATTTTACGGTTGAGCCGCAAACTTTCACAACTGACTTAAGCACCCGCCTACGCTCCCTTTAAACCCAATAAATCCGGATAACGCTCGGATCCTCCGTA----
>_000000887
CCTGTTTGCTCCCCACGCTTTCGAGCCTCAGCGTCAGTTACAGTCCAGAGAGTCGCCTTCGCCACTGGTGTTCTTCCTAATCTCTACGCATTTCACCGCTACACTAGGAATTCCACTCTCCTCTCCTGCACTCTAGATAACCAGTTTGGAATGCAGCACCCAAGTTGAGCTCGGGTATTTCACATCCCACTTAATCATCCGCCTACGCTCCCTTTACGCCCAGTAAATCCGGATAACGCTCGCCACCTACGTA----
>_000000375
CCTGTTTGCTCCCCACGCTTTCGCACCTGAGCGTCAGTCTTTGTCCAGGGGGCCGCCTTCGCCACCGGTATTCCTCCAGATCTCTACGCATTTCACCGCTACACCTGGAATTCTACCCCCCTCTACAAGACTCTAGCTGACCAGTTTCAAATGCAGTTCCCAAGTTAAGCCCGGGGATTTCACATCTGACTTAATCAACCGCCTGCGTGCGCTTTACGCCCAGTAATTCCGATTAACGCTTGCACCCTCCGTA----
>_000000510
CCTGTTTGCTCCCCACGCTTTCGAGCCTCAACGTCAGTCATCGTCCAGTAAGCCGCCTTCGCCACTGGTGTTCCTCCCAATATCTACGCATTTCACCGCTACACTGGGAATTCCACTTACCTCTCCGACACTCTAGCTGCATAGTTTCCAAAGCAGTCCCGGAGTTGAGCCCCGGGCTTTCACTTCAGACTTACACAGCCGTCTACGCTCCCTTTACACCCAGTAAATCCGGATAACGCTTGCACCATACGTA----
>_000000454
CCTGTTCGCTCCCCACGCTTTCGAGCCTCAGCGTCAGTTACAGACCAGAGAGCCGCTTTCGCCACCGGTGTTCCTCCATATATCTACGCATTTCACCGCTACACATGGAATTCCACTCTCCCCTTCTGCACTCAAGTTTGACAGTTTCCAAAGCGAACTATGGTTGAGCCACAGCCTTTAACTTCAGACTTATCAAACCGCCTGCGCTCGCTTTACGCCCAATAAATCCGGACAACGCTCGGGACCTACGTA-----
>_000000001
CCTGTTTGATACCCGCACTTTCGAGCCTCAGCGTCAGTGCTGCCCCGGCACAATGCCTTCGCGATCGGAGTTCTTCGTGATATCTAAGCATTTCACCGCTACACCACGAATTCCATGTGCCCTGTGCAGACTCAAGGCTTGCAGTTTCAACGGCTGGCCACGGTTGAGCCGTGGCATTTGACCGCTGACTTAAAAGCCCGCCTACGCTCCCTTTAAACCCAATAAATCCGGATAACGCTCGCATCTTCCGTA-----
>_000000003
CCTGTTTGCTCCCCACGCTTTCGCGCCTCAGCGTCAGTTATCGTCCAGAAAGCCGCCTTCGCCACTGGTGTTCCTCCTAATATCTACGCATTTCACCGCTACACTAGGAATTCCGCTTTCCTCTCCGACACTCAAGATATACAGTTTCAAATGCAGCCCCGGAGTTGAGCCCCGGTATTTCACATCTGACTTGTCTACCCGCCTACACGCCCTTTACACCCAGTAAATCCGGACAACGCTTGCCACCTACGTA----
>_000000455
CCCGTTCGCTACCCTGGCTTTCGCATCTCAGCGTCAGACACAGTCCAGAAAGGCGCCTTCGCCACTGGTGTTCCTCCCAATATCTACGCATTTCACCGCTACACTGGGAATTCCCCTTTCCTCTCCTGCACTCAAGCCTAACAGTTTCCAGCGCCATACGGGGTTGAGCCCCGCATTTTCACGCTCGACTTATTAAGCCGCCTACATGCTCTTTACGCCCAATAATTCCGGACAACGCTCGCCACCTACGTA-----
>_000000371
CCTGTTTGCTCCCCACGCTTTCGCACCTGAGCGTCAGTCTTTGTCCAGGGGGCCGCCTTCGCCACCGGTATTCCTCCAGATCTCTACGCATTTCACCGCTACACCTGGAATTCTACCCCCCTCTACAAGACTCTAGCTGACCAGTTTCAAATGCAGTTCCAAAGTTAAGCTCGGGGATTTCACATCTGACTTAATCAACCGCCTGCGTGCGCTTTACGCCCAGTAATTCCGATTAACGCTTGCACCCTCCGTA----
>_000001482
CCTGTTTGCTCCCCACGCTTTCGCACCTGAGCGTCAGTCTTTGTCCAGGGGGCCGCCTTCGCCACCGGTCTTCCTCCAGATCTCTACGCATTTCACCGCTACACCTGGAATTCTACCCCCCTCTACAAGACTCTAGCTGACCAGTTTCAAATGCAGTTCCCAAGTTAAGCTCGGGGATTTCACATCTGACTTAATCAACCGCCTGCGTGCGCTTTACGCCCAGTAATTCCGATTAACGCTTGCACCCTCCGTA----
>_000001938
CCTGTTTGCTCCCCACGCTTTCGAGCCTCAGCGTCAGTTATCGTCCAGTAAGCCGCCTTCGCCACTGGTGTTCCTCCTAATATCTACGCATTTCACCGCTACACTAGGAATTCCGCTTACCCCTCCGACACTCTAGTACGACAGTTTCCAATGCAGTACCGGGGTTGAGCCCCGGGCTTTCACATCAGACTTGCCGCACCGCCTGCGCTCCCTTTACACCCAGTAAATCCGGATAACGCTTGCACCATACGTA----
>_000001110
CCTGTTTGCTCCCCACGCTTTCGAGCCTCAACGTCAGTTACCGTCCAGTAAGCCGCCTTCGCCACTGGTGTTCCTCCTAATATCTACGCATTTCACCGCTACACTAGGAATTCCGCTTACCTCTCCGGCACTCAAGACTAACAGTTTCCAATGCAGTCCAGGGGTTGAGCCCCCGCCTTTCACATCAGACTTGCCAGTCCGTCTACGCTCCCTTTACACCCAGTAAATCCGGATAACGCTTGCCCCCTACGTA----
>_000001174
CCTGTTTGATACCCACACTTTCGAGCATCAGTGTCAGTTGCAGTCCAGTGAGCTGCCTTCGCAATCGGAGTTCTTCGTGATATCTAAGCATTTCACCGCTACACCACGAATTCCGCCCACCTCTACTGTACTCAAGACAGCCAGTATCAACTGCAATTTTACGGTTGAGCCGCAAACTTTCACAACTGACTTAACTGTCCACCTACGCTCCCTTTAAACCCAATAAATCCGGATAACGCTCGGATCCTCCGTA----
>_000001806
CCTGTTTGATACCCACACTTTCGAGCATCAGTGTCAGTTGCAGTCTAGTGAGCTGCCTTCGCAATCGGAGTTCTTCGTGATATCTAAGCATTTCACCGCTACACCACGAATTCCGCCCACCTCTACTGTACTCAAGACTGCCAGTTTCAACTGCAATTTTACGGTTGAGCCGCAAACTTTCACAACTGACTTAACAATCCACCTACGCTCCCTTTAAACCCAATAAATCCGGATAACGCTCGGATCCTCCGTA----
>_000001459
ACTGTTTGCTCCCCACGCTTTCGCACCTGAGCGTCAGTCTTTGTCCAGGGGGCCGCCTTCGCCACCGGTATTCCTCCAGATCTCTACGCATTTCACCGCTACACCTGGAATTCTACCCCCCTCTACAAGACTCTAGCTGACCAGTTTCAAATGCAGTTCCCAAGTTAAGCTCGGGGATTTCACATCTGACTTAATCAACCGCCTGCGTGCGCTTTACGCCCAGTAATTCCGATTAACGCTTGCACCCTCCGTA----
>_000001919
CCTGTTTGCTCCCCACGCTTTCGTGCCTCAACGTCAGATATAGTTTGGTAAGCTGCCTTCGCAATCGGTGTTCTGTATGATCTCTAAGCATTTCACCGCTACACCATACATTCCGCCTACCGCAACTACTCTCTAGTTCAACAGTATTAGAGGCAGTTCCGGTGTTAAGCACCGGTATTTCACCTCTAACTTATCAAACCGCCTACGCACCCTTTAAACCCAATAAATCCGGATAACGCTTGGATCCTCCGTA----
>_000001230
CCTGTTTGATACCCACACTTTCGAGCATCAGCGTCAGTTACAATCCAGTAAGCTGCCTTCGCAATCGGAGTTCTTCGTGATATCTAAGCATTTCACCGCTACACCACGAATTCCGCCTACCTCTGTTGCACTCAAGGTCGCCAGTATCAACTGCAATTTTACGGTTGAGCCGCAAACTTTCACAACTGACTTAACAACCCGCCTACGCTCCCTTTAAACCCAATAAATCCGGATAACGCTCGGATCCTCCGTA----
>_000001759
CCTGTTTGCTCCCCACGCTTTCGAGCCTCAACGTCAGTTACTGTCCAGTAAGCCGCCTTCGCCACTGGTGTTCCTCCTAATATCTACGCATTTCACCGCTACACTAGGAATTCCGCTTACCTCTCCAGCACTCCAGCTTAACAGTTTCCAAAGCAGTCCCGGGGTTGAGCCCCGGGCTTTCACTTCAGACTTGCTAAGCCGTCTACGCTCCCTTTACACCCAGTAAATCCGGATAACGCTTGCCCCCTACGTA----
>_000000043
CCTGTTTGCTCCCCACGCTTTCGCACCTGAGCGTCAGTCTTTGTCCAGGGGGCCGCCTTCGCCACCGGTATTCCTCCAGATCTCTACGCATTTCACCGCTACACCTGGAATTCTACCCCCCTCTACAAGACTCTAGCTTGCCAGTTTCAAATGCAGTTCCCAAGTTAAGCTCGGGGATTTCACATCTGACTTAATCAACCGCCTGCGTGCGCTTTACGCCCAGTAATTCCGATTAACGCTTGCACCCTCCGTA----
>_000001808
CCTGTTTGATACCCACACTTTCGAGCATCAGCGTCAGTTACACTCCAGTGAGCTGCCTTCGCAATCGGAGTTCTTCGTGATATCTAAGCATTTCACCGCTACACCACGAATTCCGCCCACCTCTACTGCACTCAAGACTGCCAGTATCAACTGCAATTTTACGGTTGAGCCGCAAACTTTCACAACTGACTTAACAATCCGCCTACGCTCCCTTTAAACCCAATAAATCCGGATAACGCTCGGATCCTCCGTA----
>_000001896
CCTGTTTGCTACCCACACTTTCGAGCCTCAGCGTCAGTTGGTGCCCAGTAGGCCGCCTTCGCCACTGGTGTTCCTCCCGATATCTACGCATTCCACCGCTACACCGGGAATTCCGCCTACCTCTGCACTACTCAAGAAAAACAGTTTTGAAAGCAGTTTATGGGTTGAGCCCATAGATTTCACTTCCAACTTGTCTTCCCGCCTGCGCTCCCTTTACACCCAGTAATTCCGGACAACGCTTGTGACCTACGTT----
>_000001841
CCTGTTTGCTCCCCACGCTTTCGAGCCTCAACGTCAGTTACCGTCCAGTAAGCCGCCTTCGCCACTGGTGTTCCTCCTAATATCTACGCATTTCACCGCTACACTAGGAATTCCGCTCACCTCTCCGGTACTCTAGATTGACAGTTTCCAATGCAGTCCCGGGGTTGAGCCCCGGGTTTTCACATCAGACTTGCCACTCCGTCTACGCTCCCTTTACACCCAGTAAATCCGGATAACGCTTGCACCATACGTA----
>_000000764
CCTGTTTGCTCCCCACGCTTTCGCACCTGAGCGTCAGTCTTTGTCCAGGGGGCCGCCTTCGCCACCGGTCTTCCTCCAGATCTCTACGCATTTCACCGCTACACCTGGAATTCTACCCCCCTCTACAAGACTCTAGCTTGCCAGTTTCAAATGCAGTTCCCAAGTTAAGCTCGGGGATTTCACATCTGACTTAACAAACCGCCTGCGTGCGCTTTACGCCCAGTAATTCCGATTAACGCTTGCACCCTCCGTA----
>_000001805
CCTGTTTGATACCCACACTTTCGAGCATCAGTGTCAGTTGCAGTCCAGTGAGCTGCCTTCGCAATCGGAGTTCTTCGTGATATCTAAGCATTTCACCGCTACACCACGAATTCCGCCCACCTCTACTGTACTCAAGACTGCCAGTATCAACTGCAATTTTACGGTTGAGCCGCAAACTTTCACAACTGACTTAACAATCCACCTACGCTCCCTTTAAACCCAATAAATCCGGATAACGCTCGGATCCTCCGTA----
>_000000850
CCTGTTTGCTACCCATGCTTTCGAGCCTCAGCGTCAGTTACAGACCAGACAGCCGCCTTCGCCACTGGTGTTCTTCCATATATCTACGCATTTCACCGCTACACATGGAGTTCCACTGTCCTCTTCTGCACTCAAGTTTCCCAGTTTCCGATGCACTTCTTCGGTTGAGCCGAAGGCTTTCACATCAGACTTAAGAAACCGCCTGCGCTCGCTTTACGCCCAATAAATCCGGACAACGCTTGCCACCTACGTA----
>_000000623
CCTGTTCGCTACCCACGCTCTCGTGCATCAGCGTCAGTTACAGTCTGGTAAGCTGCCTTCGCTATCGGAGTTCTAAGTTATATCTATGCATTTCACCGCTACTTAACTTATTCCGCCTACCTCGTCTGTACTCCAGTTTACCAGTATTAATGGCACAATTGAGTTTAGCTCAAATATTTAACCACTAACTTAATAAACCGCCTACGCACCCTTTAAACCCAATAAATCCGGATAACGCTCGCATCCTCCGTA-----
>_000001070
CCTGTTTGCTCCCCACGCTTTCGCGCCTCAGCGTCAGTTACAGACCAAAGAGCCGCCTTCGCCACTGGTGTTCCTCCACATCTCTACGCATTTCACCGCTACACGTGGAATTCCGCTCTTCTCTTCTGCACTCAAGTTCCCCAGTTTCCAATGACCCTCCACGGTTGAGCCGTGGGCTTTCACATCAGACTTAAGGAACCGCCTGCGCGCGCTTTACGCCCAATAATTCCGGACAACGCTTGCCACCTACGTA----
>_000001741
CCTGTTCGCTCCCCACGCTTTCGCACCTCAGCGTCAGTATTTGTCCAGCAAGCCGCCTTCGCCACTGGTGTTCCTCCTAATATCTACGCATTTCACCGCTACACTAGGAATTCCACTTGCCTCTCCAATACTCAAGTCTACCAGTTTCCAATGCACTTCACCGGTTGAGCCGGTACCTTTCACATCAGACTTAATAGACCGCCTACGCGCCCTTTACGCCCAGTCATTCCGGACAACGCTTGTCCCCTACGTA----
>_000000027
CCTGTTTGCTCCCCACGCTTTCGAGCCTCAGCGTCAGTAAAAGCCCAGCAAGCCGCCTTCGCCACTGGTGTTCCTCCTAATATCTACGCATTTCACCGCTACACTAGGAATTCCGCTTGCCTCTACTTCACTCAAGAATGTCAGTTTCAAAAGCAGGTTACGAGTTGAGCCCGTAATTTTCACTTCTGACTTGACATCCCGCCTACACTCCCTTTACACCCAGTAATTCCGGACAACGCTTGCCACCTACGTA----
>_000000456
CCTGTTCGCTCCCCACGCTTTCGTGCCTCAGCGTCAGTAATAGCTTGGAAAGCTGCCTTCGCAATCGGTGTTCTGTGTGATATCTAAGCATTTCACCGCTACACCACACATTCCGCCTTCCGCAACTACACTCTAGTCTCTCAGTATCAGAGGCAATTTCGACGTTGAGCGTCGAGCTTTCACCTCTAACTTAAAAAACAGCCTACGCACCCTTTAAACCCAATAAATCCGGATAACGCTCGGATCCTCCGTA----
>_000001069
CCTATTTGCTCCCCACGCTTTCGGGACTGAGCGTCAGTTATGCGCCAGATCGTCGCCTTCGCCACTGGTGTTCCTCCATATATCTACGCATTTCACCGCTACACATGGAATTCCACGATCCTCTCACACACTCTAGCTCTACGGTTTCCATGGCTTACCGAAGTTAAGCTTCGATCTTTCACCACAGACCCTTAGTGCCGCCTGCTCCCTCTTTACGCCCAATAATTCCGGATAACGCTCGCCACCTACGTA-----
>_000001226
CCTGTTTGCTCCCCACGCTTTCGTGCCTCAACGTCAGATATAGTTTGGTAAGCTGCCTTCGCAATCGGTGTTCTGTATGATCTCTAAGCATTTCACCGCTACACCATACATTCCGCCTACCGCAACTACTCTCTAGCTCAACAGTATTAGAGGCAGTTCCGGTGTTAAGCACCGGTATTTCACCTCTAACTTATCAAACCGCCTACGCACCCTTTAAACCCAATAAATCCGGATAACGCTTGAATCCTCCGTA----
>_000000665
CCTGTTTGCTCCCCACGCTTTCGCACCTGAGCGTCAGTCTTTGTCCAGGGGGCCGCCTTCGCCACCGGTATTCCTCCAGATCTCTACGCATTTCACCGCTACACCTGGAATTCTACCCCCCTCTACAAGACTCTAGCTGACCAGTTTCAAATGCAGTTCCCAAGTTAAGCTCGGGGATTTCACATCTGACTTAACAAACCGCCTGCGTGCGCTTTACGCCCAGTAATTCCGATTAACGCTTGCACCCTCCGTA----
>_000001611
ACTGTTTGCTCCCCACGCTTTCGCACCTGAGCGTCAGTCTTTGTCCAGGGGGCCGCCTTCGCCACCGGTATTCCTCCAGATCTCTACGCATTTCACCGCTACACCTGGAATTCTACCCCCCTCTACAAGACTCTAGCTTGCCAGTTTCAAATGCAGTTCCCAAGTTAAGCTCGGGGATTTCACATCTGACTTAACAAACCGCCTGCGTGCGCTTTACGCCCAGTAATTCCGATTAACGCTTGCACCCTCCGTA----
>_000001387
CCTGTTTGATCCCCACGCTTTCGTGCATCAGCGTCAGTCATGGCTTGGCAGGCCGCCTTCGCAATCGGGGTTCTGCGTGATATCTAAGCATTTCACCGCTACACCACGCATTCCGCCTGCCTCAAACATACTCAAGCCCCCCAGTTTCAACGGCAATTCTATGGTTGAGCCACAGACTTTCACCGCTGACTTAAAAGGCCGCCTACGCACCCTTTAAACCCAATAAATCCGGATAACGCTCGGATCCTCCGTA----
>_000000049
CCTGTTTGCTCCCCACGCTTTCGAGCCTCAGCGTCAGTAGTCGTCCAGTAAGCCGCCTTCGCCACTGGTGTTCCTCCTAATATCTACGCATTTCACCGCTACACTAGGAATTCCACTTACCCCTCCGACACTCTAGTCCTACAGTTTCCAATGCAGTCCCGGGGTTGAGCCCCGGCCTTTCACATCAGACTTGCAGGACCGCCTACGCTCCCTTTACACCCAGTAAATCCGGATAACGCTTGCTCCATACGTA----
>_000001417
CCTGATTGCTCCCCACGCTTTCGCACCTGAGCGTCAGTCTTTGTCCAGGGGGCCGCCTTCGCCACCGGTATTCCTCCAGATCTCTACGCATTTCACCGCTACACCTGGAATTCTACCCCCCTCTACAAGACTCTAGCTGACCAGTTTCAAATGCAGTTCCCAAGTTAAGCTCGGGGATTTCACATCTGACTTAATCAACCGCCTGCGTGCGCTTTACGCCCAGTAATTCCGATTAACGCTTGCACCCTCCGTA----
>_000002138
CCTGTTTGATACCCACACTTTCGAGCATCAGTGTCAGTGACAGTCTAGTGAGCTGCCTTCGCAATCGGAGTTCTTCGTGATATCTAAGCATTTCACCGCTACACCACGAATTCCGCCCACCTCTACTGTACTCAAGACTGCCAGTTTCAACTGCAATTTTACGGTTGAGCCGCAAACTTTCACAACTGACTTAACAATCCACCTACGCTCCCTTTAAACCCAATAAATCCGGATAACGCTCGGATCCTCCGTA----
>_000000768
CCTGTTTGCTCCCCACGCTTTCGCACCTGAGCGTCAGTCTTTGTCCAGGGGGCCGCCTTCGCCACCGGTATTCCTCCAGATCTCTACGCATTTCACCGCTACACCTGGAATTCTACCCCCCTCTACAAGACTCTAGCTTGCCAGTTTCAAATGCAGTTCCCACGTTAAGCGCGGGGATTTCACATCTGACTTAACAAACCGCCTGCGTGCGCTTTACGCCCAGTAATTCCGATTAACGCTTGCACCCTCCGTA----
>_000000052
CCTGTTCGCTCCCCACGCTTTCGTGCATCAGCGTCAGTAATAGCTTGGAAAGCTGCCTTCGCAATCGGTGTTCTGTGTGATATCTAAGCATTTCACCGCTACACCACACATTCCGCCTTCCGCAACTATACTCTAGACTAACAGTATCAGAGGCAATTTCGATGTTGAGCATCGAGCTTTCACCTCTAACTTACTAATCCGCCTACGCACCCTTTAAACCCAATAAATCCGGATAACGCTCGGGTCCTCCGTA----
>_000000374
CCTGTTTGCTCCCCACGCTTTCGCACCTGAGCGTCAGTCTTTGTCCAGGGGGCCGCCTTCGCCACCGGTATTCCTCCAGATCTCTACGCATTTCACCGCTACACCTGGAATTCTACCCCCCTCTACAAGACTCTAGCTGACCAGTTTCAAATGCAGTTCCCAAGTTAAGCACGGGGATTTCACATCTGACTTAATCAACCGCCTGCGTGCGCTTTACGCCCAGTAATTCCGATTAACGCTTGCACCCTCCGTA----
>_000001227
CCTGTTTGCTCCCCACGCTTTCGAGCCTCAACGTCAGTCACCGTCCAGTAAGCCGCCTTCGCCACTGGTGTTCCTCCTAATATCTACGCATTTCACCGCTACACTAGGAATTCCGCTTACCTCTCCGGCACTCCAGATCTGCAGTTTCCAAAGCAGTCCCAGGGTTGAGCCCTGGGTTTTCACTCCAGACTTGCCTATCCGTCTACGCTCCCTTTACACCCAGTAAATCCGGATAACGCTTGCACCATACGTA----
>_000001920
CCTGTTTGCTCCCCACGCTTTCGTGCCTCAACGTCAGATATAGTTTGGTAAGCTGCCTTCGCAATCGGTGTTCTGTATGATCTCTAAGCATTTCACCGCTACACCATACATTCCGCCTACCGCAACTACTCTCTAGTTCAACAGTATTAGAGGCAGTTCCGGAGTTGAGCCCCGGTATTTCACCTCTAACTTATCAAACCGCCTACGCACCCTTTAAACCCAATAAATCCGGATAACGCTTGGATCCTCCGTA----
>_000001807
CCTGTTTGATACCCACACTTTCGAGCATCAATGTCAGTTACAGGTTAGTAAGCTGCCTTCGCAATCGGAGTTCTTCGTGATATCTAAGCATTTCACCGCTACACCACGAATTCCGCCTACCTCAACTGTACTCAAGACTGCCAGTATCAATTGCAATTTTACGGTTGAGCCGCAAACTTTCACAACTGACTTAACAACCCATCTACGCTCCCTTTAAACCCAATAAATCCGGATAACGCTCGGATCCTCCGTA----
>_000000057
CCTGTTTGCTCCCCACACTTTCGAGCCTCAGCGTCAGTAAAAGCCCAGCAAGCCGCCTTCGCCACTGGTGTTCCTCCTAATATCTACGCATTTCACCGCTACACTAGGAATTCCGCTTGCCTCTACTTCACTCAAGAAAAACAGTTTTGAATGCAGTCTGTCGGTTAAGCCCACAGTTTTCACATCCAACTTGCCTTCCCGCCTACGCTCCCTTTACACCCAGTAATTCCGGACAACGCTCGCTCCCTACGTA----
>_000000733
CCTGTTCGCTACCCACGCTTTCGTGCCTCAGCGTCAGTAATAGCTTGGAAAGCTGCCTTCGCAATCGGTGTTCTGTGTGATATCTAAGCATTTCACCGCTACACCACACATTCCGCCTTCCGCAACTACACTCTAGTCTGACAGTATCAGAGGCAATTTCGATGTTGAGCATCGAGCTTTCACCTCTAACTTATCAAACCGCCTACGCACCCTTTAAACCCAATAAATCCGGATAACGCTCGGATCCTCCGTA----
>_000001964
CCTGTTCGATACCCACGCTTTCGTGCCTCAGCGTCTGTCGCACCCTAGCAGGCTGCCTTCGCAATCGGGGTTCTGCGTGATATCTATGCATTTCACCGCTACACCACGCATTCCGCCTGCCTCTTGTGCACTCTAGCTCGCCAGTTTCAACGGCACAGTCCGGGTTGAGCCCGAAAATTTCACCGCTGACTTGGCGTGCCGCCTACGCACCCTTTAAACCCAATAAATCCGGATAACGCTCGCATCCTCCGTA----
>_000000067
CCTGTTTGCTCCCCACGCTTTCGAGCCTCAACGTCAGTTACCGTCCAGTAAGCCGCCTTCGCCACTGGTGTTCCTCCTAATATCTACGCATTTCACCGCTACACTAGGAATTCCGCTTACCCCTCCGGCACTCAAGCACAGCAGTTTCCAATGCAGTCCAGGGGTTAAGCCCCTGCCTTTCACATCAGACTTGCTGCGCCGTCTACGCTCCCTTTACACCCAGTAAATCCGGATAACGCTTGCCCCCTACGTA----
>_000000967
CCTGTTTGATCCCCACGCTTTCGTGCTTCAGTGTCAGTTATAGTTTAGTAAGCTGCCTTCGCAATCGGAGTTCTGCGTGATATCTATGCATTTCACCGCTACACCACGCATTCCGCCTACCTCAAATATACTCAAGTCAACCAGTTTCAACGGCAATTTTATGGTTGAGCCACAAACTTTCACCGCTGACTTAATTAACCACCTACGCACCCTTTAAACCCAATAAATCCGGATAACGCTCGCATCCTCCGTA----
>_000001705
ACTGTTTGCTCCCCACGCTTTCGAGCCTCAGCGTCAGTTACAGTCCAGAGAGTCGCCTTCGCCACTGGTGTTCTTCCTAATCTCTACGCATTTCACCGCTACACTAGGAATTCCACTCTCCTCTCCTGCACTCTAGATAACCAGTTTGGAATGCAGCACCCAAGTTGAGCCCGGGTATTTCACATCCCACTTAATCATCCGCCTACGCTCCCTTTACGCCCAGTAAATCCGGATAACGCTCGCCACCTACGTA----
>_000000075
CCTGTTTGCTCCCCACGCTTTCGCACCTGAGCGTCAGTCTTTGTCCAGTGGGCCGCCTTCGCCACCGGTATTCCTCCAGATCTCTACGCATTTCACCGCTACACCTGGAATTCTACCCCCCTCTACAAGACTCTAGCTGACCAGTTTCAAATGCAGTTCCCAAGTTAAGCTCGGGGATTTCACATCTGACTTAATCAACCGCCTGCGTGCGCTTTACGCCCAGTAATTCCGATTAACGCTTGCACCCTCCGTA----
>_000000853
CCTGTTTGCTCCCCACGCTTTCGAGCCTCAGCGTCAGTTACAGACCAGAGAGCCGCCTTCGCCACTGGTGTTCCTCCATATATCTACGCATTTCACCGCTACACATGGAATTCCACTCTCCTCTTCTGCACTCAAGTCTCCCAGTTTCCAATGCCCCTCCCCGGTTGAGCCGGGGGCTTTCACATCAGACTTAAGAAACCGCCTGCGCTCGCTTTACGCCCAATAAATCCGGACAACGCTTGCCACCTACGTA----
>_000001017
CCTGTTTGCTCCCCACGCTTTCGAGCCTCAACGTCAGTTACTGTCCAGTAAGCCGCCTTCGCCACTGGTGTTCCTCCTAATATCTACGCATTTCACCGCTACACTAGGAATTCCGCTTACCTCTCCAGCACTCTAGCTTAACAGTTTCCAAAGCAGTCCCGGGGTTGAGCCCCGGGCTTTCACTTCAGACTTGCTAAGCCGTCTACGCTCCCTTTACACCCAGTAAATCCGGATAACGCTTGCCCCCTACGTA----
>_000000417
CCTGTTTGCTCCCCACGCTTTCGAGCCTCAGCGTCAGTTACAGACCAGAGAGTCGCCTTCGCCACTGGTGTTCCTCCACATATCTACGCATTTCACCGCTACACGTGGAATTCCACTCTCCTCTTCTGCACTCAAGTTCTCCAGTTTCCAATGACCCTCCCCGGTTGAGCCGGGGGCTTTCACATCAGACTTAAAGAACCGCCTGCGCTCGCTTTACGCCCAATAAATCCGGACAACGCTTGCCACCTACGTA----
>_000002012
CCTGTTTGCTCCCCACGCTTTCGCACCTGAGCGTCAGTCTTTGTCCAGGGGGCCGCCTTCGCCACCGGTATTCCTCCAGATCTCTACGCATTTCACCGCTACACCTGGAATTCTACCCCCCTCTACAAGACTCTAGCTGACCAGTTTCAAATGCAGTTCCCAATTTAAGCTCGGGGATTTCACATCTGACTTAATCAACCGCCTGCGTGCGCTTTACGCCCAGTAATTCCGATTAACGCTTGCACCCTCCGTA----
>_000001897
CCTGTTTGCTACCCACACTTTCGAGCCTCAGCGTCAGTTGGTGCCCAGTAGGCCGCCTTCGCCACTGGTGTTCCTCCCGATATCTACGCATTCCACCGCTACACCGGGAATTCCGCCTACCTCTGCACTACTCAAGAAAAACAGTTTTGAAAGCAGTTCATGGGTTGAGCCCATGGATTTCACTTCCAACTTGTCTTCCCGCCTGCGCTCCCTTTACACCCAGTAATTCCGGACAACGCTTGTGACCTACGTT----
>_000000775
CCTGTTTGCTCCCCACGCTTTCGCACCTGAGCGTCAGTCTTTGTCCAGGGGGCCGCCTTCGCCACCGGTATTCCTCCAGATCTCTACGCATTTCACCGCTACACCTGGAATTCTACCCCCCTCTACAAGACTCTAGCTTGCCAGTTTCAAATGCAGTTCCCAAGTTAAGCCCGGGGATTTCACATCTGACTTAACAAACCGCCTGCGTGCGCTTTACGCCCAGTAATTCCGATTAACGCTTGCACCCTCCGTA----
>_000000270
CCTGTTTGATACCCACACTTTCGAGCCTCAATGTCAGTTGCAGCTTAGCAGGCTGCCTTCGCAATCGGAGTTCTTCGTGATATCTAAGCATTTCACCGCTACACCACGAATTCCGCCTGCCTCAACTGCACTCAAGACATCCAGTATCAACTGCAATTTTACGGTTGAGCCGCAAACTTTCACAACTGACTTAAACATCCATCTACGCTCCCTTTAAACCCAATAAATCCGGATAACGCTCGGATCCTCCGTA----
>_000001372
CCTGTTTGCTCCCCACGCTTTCGCGCCTCAGCGTCAGTTACTGTCCAGCAATCCGCCTTCGCCACTGGTGTTCCTCCGTATATCTACGCATTTCACCGCTACACACGGAATTCCGATTGCCTCTCCAGCACTCAAGAACTACAGTTTCAAATGCAGGCTGGAGGTTGAGCCCCCAGTTTTCACATCTGACTTGCAATCCCGCCTACACGCCCTTTACACCCAGTAAATCCGGATAACGCTTGCCACCTACGTA----
>_000001386
CCTGTTTGATCCCCACGCTTTCGTGCATCAGCGTCAGTCATGGCTTGGCAGGCTGCCTTCGCAATCGGGGTTCTGCGTGATATCTAAGCATTTCACCGCTACACCACGCATTCCGCCTGCCTCAAACATACTCAAGCCCCCCAGTTTCAACGGCAATTCTATGGTTGAGCCACAGACTTTCACCGCTGACTTAAAAGGCCGCCTACACACCCTTTAAACCCAATAAATCCGGATAACGCTCGGATCCTCCGTA----
>_000001610
CCTGATTGCTCCCCACGCTTTCGCACCTGAGCGTCAGTCTTTGTCCAGGGGGCCGCCTTCGCCACCGGTATTCCTCCAGATCTCTACGCATTTCACCGCTACACCTGGAATTCTACCCCCCTCTACAAGACTCTAGCTTGCCAGTTTCAAATGCAGTTCCCAAGTTAAGCTCGGGGATTTCACATCTGACTTAACAAACCGCCTGCGTGCGCTTTACGCCCAGTAATTCCGATTAACGCTTGCACCCTCCGTA----
>_000001341
ACTGTTTGATACCCACACTTTCGAGCCTCAATGTCAGTTGCAGCTTAGCAGGCTGCCTTCGCAATCGGAGTTCTTCGTGATATCTAAGCATTTCACCGCTACACCACGAATTCCGCCTGCCTCAACTGCACTCAAGATATCCAGTATCAACTGCAATTTTACGGTTGAGCCGCAAACTTTCACAACTGACTTAAACATCCATCTACGCTCCCTTTAAACCCAATAAATCCGGATAACGCTCGGATCCTCCGTA----
>_000001508
CCTGTTTGATCCCCACGCTTTCGTGCTTCAGTGTCAGTTATGGTTTAGTAAGCTGCCTTCGCAATCGGAGTTCTGCGTGATATCTATGCATTTCACCGCTACACCACGCATTCCGCCTACCTCAAACACACTCAAGTAACCCAGTTTCAACGGCAATTTTATGGTTGAGCCACAAACTTTCACCGCTGACTTAAATCACCACCTACGCACCCTTTAAACCCAATAAATCCGGATAACGCTCGGATCCTCCGTA----
>_000001421
CCTGTTTGCTCCCCACGCTTTCGCACCTGAGCGTCAGTCTTTGTCCAGGGGGCCGCCTTCGCCACCGGTATTCCTCCAGATCTCTACGCATTTCACCGCTACACCTGGAATTCTACCCCCCTCTACAAGACTCTAGCTGACCAGTTTCAAATGCAGTTCCCAAGTTAAGCTCGGGGATTTCACATCTGACTTAATCAACCGCCTGCGTGCGCTTTACGCCCAGTAATTCCGATTAACGCTTGCACCCTCCGTG----
>_000000023
CCTGTTTGCTCCCCACGCTTTCGAGCCTCAACGTCAGTTACAGTCCAGTAAGCCGCCTTCGCCACTGGTGTTCCTCCTAATATCTACGCATTTCACCGCTACACTAGGAATTCCACTTACCTCTCCTGCACTCCAGCAGCACAGTTTCCAAAGCAGTCCCGGGGTTGGGCCCCGGGCTTTCACTCCAGACTTGCGTCGCCGTCTACGCTCCCTTTACACCCAGTAAATCCGGATAACGCTTGCCCCCTACGTA----
>_000000047
CCTGTTTGCTCCCCACGCTTTCGAGCCTCAGCGTCAGTTATCGTCCAGTAAGCCGCCTTCGCCACTGGTGTTCCTCCTAATATCTACGCATTTCACCGCTACACTAGGAATTCCACTTACCCCTCCGACACTCTAGATGACCAGTTTCCAATGCAGTACCGGGGTTGAGCCCCGGGCTTTCACATCAGACTTAGCCTTCCGCCTGCGCTCCCTTTACACCCAGTAAATCCGGATAACGCTTGCACCATACGTA----
>_000000025
CCTGTTCGCTACCCACGCTCTCGCGCATCAGCGTCAGATCGAGCCTGGGAAGCTGCCTTCGCTATCGGGGTTCCAAGTGATATCTAAGCATTTCACCGCTACTTCACTTGTTCCGCCTCCCTCGTCTCGTCTCCAGGTCGCCAGTTTCAACGGCGTGCTACAGTTTAGCTGCAGTCTTTTACCGCTGACTTGGCGTCCCGCCTACGCGCCCTTTAAACCCAATAAATCCGGATAACGCTCGCATCCCCCGTA-----
>_000001760
CCTGTTTGCTCCCCACGCTTTCGAGCCTCAACGTCAGTTACTGTCCAGTAAGCCGCCTTCGCCACTGGTGTTCCTCCTAATATCTACGCATTTCACCGCTACACTAGGAATTCCGCTTACCTCTCCAGCACTCCAGCTTAACAGTTTCCAAAGCAGTCCCGGGGTTGAGCCCCGGGCTTTCACTTCAGACTTACTAAGCCGTCTACGCTCCCTTTACACCCAGTAAATCCGGATAACGCTTGCCCCCTACGTA----
>_000001429
CCTGTTTGCTCCCCACGCTTTCGCCCCTGAGCGTCAGTCTTTGTCCAGGGGGCCGCCTTCGCCACCGGTATTCCTCCAGATCTCTACGCATTTCACCGCTACACCTGGAATTCTACCCCCCTCTACAAGACTCTAGCTGACCAGTTTCAAATGCAGTTCCCAAGTTAAGCTCGGGGATTTCACATCTGACTTAATCAACCGCCTGCGTGCGCTTTACGCCCAGTAATTCCGATTAACGCTTGCACCCTCCGTA----
>_000001665
ACTGTTTGCTCCCCACGCTTTCGAGCCTCAGCGTCAGTTACAGACCAGAGAGCCGCCTTCGCCACTGGTGTTCCTCCATATATCTACGCATTTCACCGCTACACATGGAATTCCACTCTCCTCTTCTGCACTCAAGTCTCCCAGTTTCCAATGACCCTCCCCGGTTGAGCCGGGGGCTTTCACATCAGACTTAAGAAACCGCCTGCGCTCGCTTTACGCCCAATAAATCCGGACAACGCTTGCCACCTACGTA----
>_000000022
CCTGTTTGCTCCCCACGCTTTCGCACCTCAGTGTCAGTATCAGTCCAGGTGGTCGCCTTCGCCACTGGTGTTCCTTCCTATATCTACGCATTTCACCGCTACACAGGAAATTCCACCACCCTCTACCGTACTCTAGCTCGCCAGTTTTGGATGCAGTTCCCAGGTTGAGCCCGGGGCTTTCACATCCAACTTAACGAACCACCTACGCGCGCTTTACGCCCAGTAATTCCGATTAACGCTTGCACCCTTCGTA----
>_000000937
CCTGTTTGCTCCCCACGCTTTCGAGCCTCAGCGTCAGTAAAAGCCCAGCAAGCCGCCTTCGCCACTGGTGTTCCTCCTAATATCTACGCATTTCACCGCTACACTAGGAATTCCGCTTGCCTCTACTTCACTCAAGAATGTCAGTTTCAAAAGCAGGTTACGAGTTGAGCCCGTAATTTTCACTTCTGACTTGATATCCCGCCTACACTCCCTTTACACCCAGTAATTCCGGACAACGCTTGCCACCTACGTA----
>_000001510
ACTGTTTGATCCCCACGCTTTCGTGCTTCAGTGTCAGTTATGGTTTAGTAAGCTGCCTTCGCAATCGGAGTTCTGCGTGATATCTATGCATTTCACCGCTACACCACGCATTCCGCCTACCTCAAACACACTCAAGTAACCCAGTTTCAACGGCAATTTTATGGTTGAGCCACAAACTTTCACCGCTGACTTAAATCACCACCTACGCACCCTTTAAACCCAATAAATCCGGATAACGCTCGCATCCTCCGTA----
>_000001391
CCTGTTTGATCCCCACGCTTTCGTGCATCAGCGTCAGTCATGGCTTGGCAGGCTGCCTTCGCAATCGGGGGTCTGCGTGATATCTAAGCATTTCACCGCTACACCACGCATTCCGCCTGCCTCAAACATACTCAAGCCCCCCAGTTTCAACGGCAATTCTATGGTTGAGCCACAGACTTTCACCGCTGACTTAAAAGGCCGCCTACGCACCCTTTAAACCCAATAAATCCGGATAACGCTCGGATCCTCCGTA----
>_000000419
CCTGTTTGCTCCCCACGCTTTCGTGCCTCAGCGTCAGTTACAGTCCAGAGAGCCGCCTTCGCTACTGGTGTTCCTCCTAATATCTACGCATTTCACCGCTACACTAGGAATTCCACTCTCCTCTCCTGCACTCAAGTCCTACAGTTCCAAAAGCTTACTACGGTTGAGCCGTAGCCTTTCACTTCTGGCTTGAAAGACCGCCTACGCACCCTTTACGCCCAGTAATTCCGGATAACGCTAGCCCCCTACGTA-----
>_000000268
CCTGTTTGATACCCACACTTTCGAGCATCAGCGTCAGTTACAGTCCAGCAAGCTGCCTTCGCAATCGGAGTTCTTCGTGATATCTAAGCATTTCACCGCTACACCACGAATTCCGCCTGCCTCTACTGTACTCAAGACACCCAGTATCAACTGCAATTTTACGGTTGAGCCGCAAACTTTCACAACTGACTTAAACATCCATCTACGCTCCCTTTAAACCCAATAAATCCGGATAACGCTCGGATCCTCCGTA----
>_000000626
CCTGTTCGCTACCCACGCTCTCGTGCATCAGCGTCAGTTTCAGTCTGGTAAGCTGCCTTCGCTATCGGAGTTCTAAGTTATATCTATGCATTTCACCGCTACTTAACTTATTCCGCCTACCTCGTCTGAACTCCAGTTTACCAGTATTAATGGCAGTATTGAGTTTAGCTCAAACATTTAACCACTAACTTAATAAACCGCCTACGCACCCTTTAAACCCAATAAATCCGGATAACGCTCGCATCCTCCGTA-----
>_000000885
CCTGTTTGCTCCCCACACTTTCGTGCCTCAACGTCAGTTACTGTCCAGAAAGTCGCCTTCGCCACTGGTGTTCCTCCTAATATCTACGCATTTCACCGCTACACTAGGAATTCCACTTTCCTCTCCAGCACTCAAGAAAATCAGTTTTAGTTGCAGTTCCTCAGTTAAGCCGAGGGATTTCACAACTAACTTAATTTCCCGTCTACGCACCCTTTACACCCAATAAATCCGGATAACGCTTGCTCCCTACGTA----
>_000001185
CCTGTTTGCTACCCATGCTTTCGAGCCTCAGCGTCAGTTGGTGCCCAGTAGACCGCCTTCGCCACTGGTGTTCCTCCCGATATCTACGCATTCCACCGCTACACCGGGAATTCCATCTACCTCTGCACTACTCAAGAAAAACAGTTTTGAAAGCAATTCATGGGTTGAGCCCATGGTTTTCACTTCCAACTTGTCTTCCCGCCTGCGCTCCCTTTACACCCAGTAATTCCGGACAACGCTTGCACCCTACGTT----
>_000001738
CCTGTTCGCTCCCCACGCTTTCGCACCTCAGCGTCAGTATTTGTCCAGCAAGCCGCCTTCGCCACTGGTGTTCCTCCTAATATCTACGCATTTCACCGCTACACTAGGAATTCCACTTGCCTCTCCAATACTCAAGTCTACCAGTTTCCAATGCACTTCACCGGTTGAGCCGGTACCTTTCACATCAGACTTAATAGACCGCCTACGCGCCCTTTACGCCCAGTCATTCCGGACAACGCTTGTCCCCTACGTT----
>_000001539
CCTGTTTGCTCCCCACGCTTTCGAGCCTCAGTGTCAGTTACAGTCCAGTGAGCCGCCTTCGCCACTGGTGTTCCTCCTAATATCTACGCATTTCACCGCTACACTAGGAATTCCACTCACCCCTCCTGCACTCTAGCCTTACAGTTTCAAAAGCAGTTCCGGGGTTGAGCCCCGGATTTTCACTTCTGACTTGCATGGCCACCTACACTCCCTTTACACCCAGTAAATCCGGATAACGCTTGCTCCATACGTA----
>_000001574
CCTGTTTGATACCCACACTTTCGAGCCTCAATGTCAGTTGCAGCTTAGCAGGCTGCCTTCGCAATCGGAGTTCTTCGTGATATCTAAGCATTTCACCGCTACACCACGAATTCCGCCTGCCTCAACTGCACTCAAGATATCCAGTATCAACTGCAATTTTACGGTTGAGCCGCAAACTTTCACAACTGACTTAAGCGTCCGCCTACGCTCCCTTTAAACCCAATAAATCCGGATAACGCTCGGATCCTCCGTA----
>_000002017
CCTGTTTGCTCCCCACGATTTCGCACCTGAGCGTCAGTCTTTGTCCAGGGGGCCGCCTTCGCCACCGGTATTCCTCCAGATCTCTACGCATTTCACCGCTACACCTGGAATTCTACCCCCCTCTACAAGACTCTAGCTGACCAGTTTCAAATGCAGTTCCCAAGTTAAGCTCGGGGATTTCACATCTGACTTAATCAACCGCCTGCGTGCGCTTTACGCCCAGTAATTCCGATTAACGCTTGCACCCTCCGTA----
>_000001507
CCTGTTTGATCCCCACGCTTTCGTGCTTCAGTGTCAGTTATGGTTTAGTAAGCTGCCTTCGCAATCGGAGTTCTGCGTGATATCTATGCATTTCACCGCTACACCACGCATTCCGCCTACCTCAAACACACTCAAGTAACCCAGTTTCAACGGCAATTTTATGGTTGAGCCACAAACTTTCACCGCTGACTTAAATCACCGCCTACGCACCCTTTAAACCCAATAAATCCGGATAACGCTCGCATCCTCCGTA----
>_000000044
CCTGTTTGCTCCCCACGCTTTCGCACCTGAGCGTCAGTCTTTGTCCAGTGGGCCGCCTTCGCCACCGGTATTCCTCCAGATCTCTACGCATTTCACCGCTACACCTGGAATTCTACCCCCCTCTACAAGACTCTAGCTTGCCAGTTTCAAATGCAGTTCCCAAGTTAAGCTCGGGGATTTCACATCTGACTTAACAAACCGCCTGCGTGCGCTTTACGCCCAGTAATTCCGATTAACGCTTGCACCCTCCGTA----
>_000000971
CCTGTTTGCTACCCACACTTTCGAGCCTCAGCGTCAGTTGGTGCCCAGTAGGCCGCCTTCGCCACTGGTGTTCCTCCCGATATCTACGCATTCCACCGCTACACCGGGAATTCCGCCTACCTCTGCACTACTCAAGAAAAACAGTTTTGAAAGCAGTTCATGGGTTGAGCCCATGGATTTCACTTCCAACTTGTTCTCCCGCCTGCGCTCCCTTTACACCCAGTAATTCCGGACAACGCTTGTGACCTACGTT----
>_000000666
CCTGTTTGCTCCCCACGCTTTCGCACCTGAGCGTCAGTCTTTGTCCAGGGGGCCGCCTTCGCCACCGGTATTCCTCCAGATCTCTACGCATTTCACCGCTACACCTGGAATTCTACCCCCCTCTACAAGACTCTAGCTGACCAGTTTCAAATGCAGTTCCCAAGTTAAGCTCGGGGATTTCACATCTGACTTAACCAACCGCCTGCGTGCGCTTTACGCCCAGTAATTCCGATTAACGCTTGCACCCTCCGTA----
>_000000012
CCTGTTCGATACCCACGCTTTCGAGCTTCAGCGTCAGTTGCGCTACAGCAGGCTGCCTTCGCAATCGGAGTTCTTCGTCATATCTAAGCATTTCACCGCTACACGACGAATTCCGCCTACTTCCTGCGCACTCAAGTCTCACAGTTCGCGCTGCAATGCCCAGGTTGAGCCCCGACATTTCACAACACGCTTATAAGACGGCCTACGCTCCCTTTAAACCCAATAAATCCGGATAACGCCCGGACCTTCCGTA----
>_000001231
CCTGTTTGCTCCCCACGCTTTCGAGCCTCAGCGTCAGTTATCGTCCAGTAAGCCGCCTTCGCCACTGGTGTTCCTCCTAATATCTACGCATTTCACCGCTACACTAGGAATTCCACTTACCTCTCCGATACTCAAGTACGACAGTTTCCAATGCAGTCCCGGGGTTGAGCCCCGGGCTTTCACATCAGACTTGCCGCACCGCCTGCGCTCCCTTTACACCCAGTAAATCCGGATAACGCTTGCCCCCTACGTA----
>_000001643
CCTGTTTGCTCCCCACGCTTTCGTGCCTGAGCGTCAGTCTTTGTCCAGGGGGCCGCCTTCGCCACCGGTATTCCTCCAGATCTCTACGCATTTCACCGCTACACCTGGAATTCTACCCCCCTCTACAAGACTCTAGTTTGCCAGTTCGAAATGCGGTTCCCAGGTTGAGCCCGGGGCTTTCACATCTCGCTTAACAAACCGCCTGCGCACGCTTTACGCCCAGTAATTCCGATTAACGCTCGCACCCTCCGTA----
>_000001980
CCTGTTCGATACCCACGCTTTCGTGCCTCAGCGTCTGTTTCACCCTAGCAGGCTGCCTTCGCAATCGGGGTTCTGCGTGATATCTATGCATTTCACCGCTACACCACGCATTCCGCCTGCCTCTTGTGTACTCTAGCTCGCCAGTTTCAACGGCACACTCCGGGTTGAGCCCGGAAATTTCACCGCTGACTTGGCGTGCCGCCTACGCACCCTTTAAACCCAATAAATCCGGATAACGCTCGCATCCTCCGTA----
>_000001113
CCTGTTTGCTCCCCACGCTTTCGAGCCTCAATGTCAGTTACAGTCCAGTAAGCCGCCTTCGCCACCGGTGTTCCTCCTAATATCTACGCATTTCACCGCTACACTAGGAATTCCGCTTACCTCTCCTGCACTCTAGCTTAACAGTTTCCAAAGCAGTCCCGGGGTTAAGCCCCGGGCTTTCACTTCAGACTTGCCATGCCATCTACGCTCCCTTTACACCCAGTAAATCCGGATAACGCTTGCCCCCTACGTA----
>_000001742
CCTGTTCGCTCCCCACGCTTTCGCACCTCAGCGTCAGTATTTGTCCAGCAAGCCGCCTTCGCCGCTGGTGTTCCTCCTAATATCTACGCATTTCACCGCTACACTAGGAATTCCACTTGCCTCTCCAATACTCAAGTCTACCAGTTTCCAATGCACTTCACCGGTTGAGCCGGTACCTTTCACATCAGACTTAATAGACCGCCTACGCGCCCTTTACGCCCAGTCATTCCGGACAACGCTTGTCCCCTACGTA----
>_000001644
CCTGTTTGCTCCCCACGCTTTCGCACCTGAGCGTCAGTCTTTGTCCAGGGGGCCGCCTTCGCCACCGGTATTCCTCCAGATCTCTACGCATTTCACCGCTACACCTGGAATTCTACCCCCCTCTACAAGACTCTAGCCTGCCAGTTTCGGATGCAGTTCCCAGGTTGAGCCCGGGGATTTCACATCCGACTTGACAGACCGCCTGCGTGCGCTTTACGCCCAGTAATTCCGATTAACGCTTGCACCCTCCGTA----
>_000001940
CCTGTTTGCTCCCCACGCTTTCGAGCCTCAGCGTCAGTTATCGTCCAGTAAGCCGCCTTCGCCACTGGTGTTCCTCCTAATATCTACGCATTTCACCGCTACACTAGGAATTCCACTTACCCCTCCGACACTCTAGTACGACAGTTTCCAATGCAGTACCGGGGTTGAGCCCCGGGCTTTCACATCAGACTTGCCGCACCGCCTGCGCTCCCTTTACACCCAGTAAATCCGGATAACGCTTGCACCATACGTA----
>_000001583
ACTGTTTGATACCCACACTTTCGAGCATCAGCGTCAGTTACAGTCCAGCAAGCTGCCTTCGCAATCGGAGTTCTTCGTGATATCTAAGCATTTCACCGCTACACCACGAATTCCGCCTGCCTCTACTGTACTCAAGACACCCAGTATCAACTGCAATTTTACGGTTGAGCCGCAAACTTTCACAACTGACTTAAGCGTCCGCCTACGCTCCCTTTAAACCCAATAAATCCGGATAACGCTCGGATCCTCCGTA----
>_000000024
CCTGTTTGCTCCCCACGCTTTCGAGCCTCAGTGTCAGTTACAGTCCAGTAAGCCGCCTTCGCCACTGGTGTTCCTCCTAATATCTACGCATTTCACCGCTACACTAGGAATTCCACTTACCTCTCCTGCACTCCAGTTCCACAGTTTCAAAAGCAGTCCCGGGGTTGAGCCCCGGGCTTTCACTTCTGACTTGTGATACCACCTACACTCCCTTTACACCCAGTAAATCCGGATAACGCTTGCTCCATACGTA----
>_000001460
ACTGATTGCTCCCCACGCTTTCGCACCTGAGCGTCAGTCTTTGTCCAGGGGGCCGCCTTCGCCACCGGTATTCCTCCAGATCTCTACGCATTTCACCGCTACACCTGGAATTCTACCCCCCTCTACAAGACTCTAGCTGACCAGTTTCAAATGCAGTTCCCAAGTTAAGCTCGGGGATTTCACATCTGACTTAATCAACCGCCTGCGTGCGCTTTACGCCCAGTAATTCCGATTAACGCTTGCACCCTCCGTA----
>_000001418
CCTGTTTGCTCCCCACGCTTTCGCACCTGAGCGTCAGTCTTTGTCCAGGGGGCCGCCTTCGCCACCGGTATTCCTCCAGATCTCTACGCATTTCACCGCTACACCTGGAATTCTACCCCCCTCTACAAGACTCTAGCTGACCAGTTTCAAATGCAGTTCCCAAGTTAAGCTCGGGGATTTCACATCTGACTTAATCAACCGCCTGCGTGCGCTTTACGCCCAGTAATTCCGAGTAACGCTTGCACCCTCCGTA----
>_000001241
CCTGTTTGCTACCCATGCTTTCGAGCCTCAGCGTCAGTTGGTGCCCAGTAGGTCGCCTTCGCCACTGGTGTTCCTCCCGATATCTACGCATTCCACCGCTACACCGGGAATTCCACCTACCTCTGCACTACTCAAGGCCAGCAGTTTTGAAAGCAATTTATGGGTTGAGCCCATAGTTTTCACTTCCAACTTGCCGGTCCGCCTGCGCTCCCTTTACACCCAGTAATTCCGGACAACGCTTGCACCCTACGTT----
>_000001965
CCTGTTCGATACCCACGCTTTCGTGCCTCAGCGTCTGTCGCACCCTAGCAGGCTGCCTTCGCAATCGGGGTTCTGCGTGATATCTATGCATTTCACCGCTACACCACGCATTCCGCCTGCCTCTTGTGCACTCTAGCTCGCCAGTTTCAACGGCACAGTCCGGGTTGAGCCCGGAAATTTCACCGCTGACTTGGCGTGCCGCCTACGCACCCTTTAAACCCAATAAATCCGGATAACGCTCGCATCCTCCGTA----
>_000000271
CCTGTTTGATACCCACACTTTCGAGCATCAGCGTCAGTTACAGTCCAGCAAGCTGCCTTCGCAATCGGAGTTCTTCGTGATATCTAAGCATTTCACCGCTACACCACGAATTCCGCCTGCCTCAACTGCACTCAAGATATCCAGTATCAACTGCAATTTTACGGTTGAGCCGCAAACTTTCACAACTGACTTAAACATCCATCTACGCTCCCTTTAAACCCAATAAATCCGGATAACGCTCGGATCCTCCGTA----
>_000001619
CCTGTTTGCTCCCCACGCTTTCGCCCCTGAGCGTCAGTCTTTGTCCAGGGGGCCGCCTTCGCCACCGGTATTCCTCCAGATCTCTACGCATTTCACCGCTACACCTGGAATTCTACCCCCCTCTACAAGACTCTAGCTTGCCAGTTTCAAATGCAGTTCCCAAGTTAAGCTCGGGGATTTCACATCTGACTTAACAAACCGCCTGCGTGCGCTTTACGCCCAGTAATTCCGATTAACGCTTGCACCCTCCGTA----
>_000001234
CCTGTTTGCTCCCCACGCTTTCGTGCCTCAACGTCAGATATAGTTTGGTAAGCTGCCTTCGCAATCGGTGTTCTGTATGATCTCTAAGCATTTCACCGCTACACCATACATTCCGCCTACCGCAACTACTCTCTAGCTCAACAGTATTAGAGGCACGTTCAGGGTTGAGCCCCGAAATTTCACCTCTAACTTATCAAACCGCCTACGCACCCTTTAAACCCAATAAATCCGGATAACGCTTGAATCCTCCGTA----
>_000001109
CCTGTTTGCTCCCCACGCTTTCGTGCCTCAACGTCAGATATAGTTTGGTAAGCTGCCTTCGCAATCGGTGTTCTGTATGATCTCTAAGCATTTCACCGCTACACCATACATTCCGCCTACCGCAACTACTCTCTAGTCTAACAGTATTAGAGGCAGTTCCGGAGTTAAGCCCCGGGATTTCACCTCTAACTTATCAAACCGCCTACGCACCCTTTAAACCCAATAAATCCGGATAACGCTTGAATCCTCCGTA----
>_000000888
CCTGTTTGCTCCCCACGCTTTCGAGCCTCAGCGTCAGTTACAGTCCAGAGAGTCGCCTTCGCCACTGGTGTTCTTCCTAATCTCTACGCATTTCACCGCTACACTAGGAATTCCACTCTCCTCTCCTGCACTCTAGATAACCAGTTTGGAATGCAGCACCCAAGTTGAGCCCGGGTATTTCACATCCCACTTAATCATCCGCCTACGCTCCCTTTACGCCCAGTAAATCCGGATAACGCTCGCCACCTCCGTA----
>_000001979
CCTGTTCGATACCCACGCTTTCGTGCCTCAGCGTCTGTTTCACCCTAGCAGGCTGCCTTCGCAATCGGGGTTCTGCGTGATATCTATGCATTTCACCGCTACACCACGCATTCCGCCTGCCTCTTGTGCACTCTAGCTCGCCAGTTTCAACGGCACACTCCGGGTTGAGCCCGGAAATTTCACCGCTGACTTGGCGTGCCGCCTACGCACCCTTTAAACCCAATAAATCCGGATAACGCTCGCATCCTCCGTA----
>_000000770
CCTGTTTGCTCCCCACGCTTTCGCACCTGAGCGTCAGTCTTTGTCCAGGGGGCCGCCTTCGCCACCGGTATTCCTCCAGATCTCTACGCATTTCACCGCTACACCTGGAATTCTACCCCCCTCTACAAGACTCTAGCTTGCCAGTTTCAAATGCAGTTCCCAAGTTAAGCACGGGGATTTCACATCTGACTTAACAAACCGCCTGCGTGCGCTTTACGCCCAGTAATTCCGATTAACGCTTGCACCCTCCGTA----
>_000001344
CCTGTTTGATACCCACACTTTCGAGCCTCAATGTCAGTTGCAGCTTAGCAGGCTGCCTTCGCAATCGGAGTTCTTCGTGATATCTAAGCATTTCACCGCTACACCACGAATTCCGCCTGCCTCAACTGCACTCAAGATATCCAGTATCAACTGCAATTTTACGGTTGAGCCGCAAACTTTCACAACTGACTTAAACATCCATCTACGCTCCCTTTAAACCCAATAAATCCGGATAACGCTCGCATCCTCCGTA----
>_000000009
CCTGTTTGCTCCCCACGCTTTCGTGCCTCAGCGTCAGTTCCGGTCCAGCAGGCCGCCTTCGCCACTGGTGTTCCTCCTAATATCTACGCATTTCACCGCTACACTAGGAATTCCGCCTGCCTCTCCCGGACTCAAGCTCGGCAGTTTCAAATGCAGCCCCGGGGTTGAGCCCCGGTCTTTCACATCTGACTTGCTGTGCCGCCTACGCACCCTTTACACCCAGTAAATCCGGATAACGCTTGCTCCATACGTA----
>_000002160
ACTGTTTGCTCCCCACGCTTTCGAGCCTCAACGTCAGTTACCGTCCAGTAAGCCGCCTTCGCCACTGGTGTTCCTCCTAATATCTACGCATTTCACCGCTACACTAGGAATTCCGCTTACCTCTCCGGTACTCTAGATTGACAGTTTCCAATGCAGTCCCGGGGTTGAGCCCCGGGTTTTCACATCAGACTTGCCACTCCGTCTACGCTCCCTTTACACCCAGTAAATCCGGATAACGCTTGCACCATACGTA----
>_000000813
CCTGTTTGCTCCCCACGCTTTCGAGCCTCAACGTCAGTTACAGTCCAGTAAGCCGCCTTCGCCACTGGTGTTCCTCCTAATATCTACGCATTTCACCGCTACACTAGGAATTCCACTTACCTCTCCTGCACTCCAGCAACACAGTTTCCAAAGCAGTCCCGGGGTTGGGCCCCGGGCTTTCACTCCAGACTTGCGTCGCCGTCTACGCTCCCTTTACACCCAGTAAATCCGGATAACGCTTGCCCCCTACGTA----
>_000002085
CCTGTTTGCTCCCCACGCTTTCGAGCCTCAGCGTCAGTTACAGACCAGAGAGCCGCCTTCGCCACTGGTGTTCCTCCATATATCTACGCATTTCACCGCTACACATGGAATTCCACTCTCCTCTTCTGCACTCAAGTCTCCCAGTTTCCAATGACCCTCCCCGGTTGAGCCGGGGGATTTCACATCAGACTTAAGAAACCGCCTGCGCTCGCTTTACGCCCAATAAATCCGGACAACGCTTGCCACCTACGTA----
>_000001538
CCTGTTTGCTCCCCACGCTTTCGAGCCTCAGTGTCAGTTACAGTCCAGTGAGCCGCCTTCGCCACTGGTGTTCCTCCTAATATCTACGCATTTCACCGCTACACTAGGAATTCCACTCACCCCTCCTGCACTCCAGCCTTACAGTTTCAAAAGCAGTTCCGGGGTTGAGCCCCGGATTTTCACTTCTGACTTGCATGGCCACCTACACTCCCTTTACACCCAGTAAATCCGGATAACGCTTGCTCCATACGTA----
>_000002187
CCTGTTTGCTCCCCACGCTTTCGCACCTGAGCGTCAGTCTTTGTCCAGGGGGCCGCCTTCGCCACCGGTATTCCTCCAGATCTCTACGCATTTCACCGCTACACCTGGAATTCTACCCCCCTCTACAAGACTCTAGCTGACCAGTTTCAAATGCAGTTCCCAAGTAAAGCTCGGGGATTTCACATCTGACTTAATCAACCGCCTGCGTGCGCTTTACGCCCAGTAATTCCGATTAACGCTTGCACCCTCCGTA----
>_000002048
CCTGTTTGCTCCCCACGCTTTCGTGCTTCAGTGTCAGTTATGGTTTAGTAAGCTGCCTTCGCAATCGGAGTTCTGCGTGATATCTATGCATTTCACCGCTACACCACGCATTCCGCCTACCTCAAACACACTCAAGTAACCCAGTTTCAACGGCAATTTTATGGTTGAGCCACAAACTTTCACCGCTGACTTAAATCACCACCTACGCACCCTTTAAACCCAATAAATCCGGATAACGCTCGCATCCTCCGTA----
>_000002016
CCTGTTTGCTCCCCACGCTTTCGCACCTGAGCGTCAGTCTTTGTCCAGGGGGCCGCCTTCGCCACCGGTATTCCTCCAGATCTCTACGCATTTCACCGCTACACCTGGAATTCTACCCCCCTCTACAAGACTCTAGCTGACCAGTTTCAAATGCAGTTCCCAAGTTAAGCTCGGGGATTTCACATCTGCCTTAATCAACCGCCTGCGTGCGCTTTACGCCCAGTAATTCCGATTAACGCTTGCACCCTCCGTA----
>_000001786
ACTGTTTGATACCCACACTTTCGAGCATCAGCGTCAGTTACAGTCCAGTAAGCTGCCTTCGCAATCGGAGTTCTTCGTGATATCTAAGCATTTCACCGCTACACCACGAATTCCGCCTACCTCTGCTGCACTCAAGACTACCAGTATCAACTGCAATTTTACGGTTGAGCCGCAAACTTTCACAACTGACTTAATAATCCGCCTACGCTCCCTTTAAACCCAATAAATCCGGATAACGCTCGGATCCTCCGTA----
>_000002219
CCTGTTTGCTCCCCACGCTTTCGCACCTGAGCGTCAGTCTTTGTCCAGGGGGCCGCCTTCGCCACCGGTATTCCTCCAGATCTCTACGCATTTCACCGCTACACCTGGAATTCTACCCCCCTCTACAAGACTCTAGCTGACCAGTTTCAAATGCATTTCCCAAGTTAAGCTCGGGGATTTCACATCTGACTTAATCAACCGCCTGCGTGCGCTTTACGCCCAGTAATTCCGATTAACGCTTGCACCCTCCGTA----
>_000002181
CCTGTTTGCTCCCCACGCTTTCGCACCTGAGCGTCAGTCTTTGTCCAGGGGGCCGCCTTCGCCACCGGTATTCCTCCAGATCTCTACGCATTTCACCGCTACACCTGGAATTCTACCCCCCTCTACAAGACTCTAGCTGACCAGTTTCAAAGGCAGTTCCCAAGTTAAGCTCGGGGATTTCACATCTGACTTAATCAACCGCCTGCGTGCGCTTTACGCCCAGTAATTCCGATTAACGCTTGCACCCTCCGTA----
>_000002024
CCTGTTTGCTCCCCACGCTTTCGCACCTGAGCGTCAGTCTTTGTCCAGGGGGCCGCCTTCGCCACCGGTATTCCTCCAGATCTCTACGCATTTCACCGCTACACCTGGAATTCTACCCCCCTCTACAAGACTCTAGCTGACCAGTTTCAAATGCAGTTCCCAAGTTAAGCTCGGGGATTTCCCATCTGACTTAATCAACCGCCTGCGTGCGCTTTACGCCCAGTAATTCCGATTAACGCTTGCACCCTCCGTA----
>_000001511
CCTGATTGATCCCCACGCTTTCGTGCTTCAGTGTCAGTTATGGTTTAGTAAGCTGCCTTCGCAATCGGAGTTCTGCGTGATATCTATGCATTTCACCGCTACACCACGCATTCCGCCTACCTCAAACACACTCAAGTAACCCAGTTTCAACGGCAATTTTATGGTTGAGCCACAAACTTTCACCGCTGACTTAAATCACCACCTACGCACCCTTTAAACCCAATAAATCCGGATAACGCTCGCATCCTCCGTA----
>_000001343
CCTGATTGATACCCACACTTTCGAGCCTCAATGTCAGTTGCAGCTTAGCAGGCTGCCTTCGCAATCGGAGTTCTTCGTGATATCTAAGCATTTCACCGCTACACCACGAATTCCGCCTGCCTCAACTGCACTCAAGATATCCAGTATCAACTGCAATTTTACGGTTGAGCCGCAAACTTTCACAACTGACTTAAACATCCATCTACGCTCCCTTTAAACCCAATAAATCCGGATAACGCTCGGATCCTCCGTA----
>_000002182
CCTGTTTGCTCCCCACGCTTTCGCACCTGAGCGTCAGTCTTTGTCCAGGGGGCCGCCTTCGCCACCGGTATTCCTCCAGATCTCTACGCATTTCACCGCTACACCTGGAATTCTACCCCCCTCTACAAGACTCTAGCTGACCAGTTTCAAATGCAGTTCCCAAGTTAAGCTCGGGAATTTCACATCTGACTTAATCAACCGCCTGCGTGCGCTTTACGCCCAGTAATTCCGATTAACGCTTGCACCCTCCGTA----
>_000001993
CCTGTTTGATACCCACACTTTCGAGCCTCAATGTCAGTTGCAGCTTAGCAGGCTGCCTTCGCAATCGGAGTTCCTCGTGATATCTAAGCATTTCACCGCTACACCACGAATTCCGCCTGCCTCAACTGCACTCAAGATATCCAGTATCAACTGCAATTTTACGGTTGAGCCGCAAACTTTCACAACTGACTTAAACATCCATCTACGCTCCCTTTAAACCCAATAAATCCGGATAACGCTCGGATCCTCCGTA----
>_000001572
CCTGTTTGATACCCACACTTTCGAGCCTCAATGTCAGTTGCAGCTTAGCAGGCTGCCTTCGCAATCGGAGTTCTTCGTGATATCTAAGCATTTCACCGCTACACCACGAATTCCGCCTGCCTCTACTGTACTCAAGACACCCAGTATCAACTGCAATTTTACGGTTGAGCCGCAAACTTTCACAACTGACTTAAGCGTCCGCCTACGCTCCCTTTAAACCCAATAAATCCGGATAACGCTCGGATCCTCCGTA----
>_000002139
CCTGTTTGATACCCACACTTTCGAGCATCAGTGTCAGTAACAGTCTAGTGAGCTGCCTTCGCAATCGGAGTTCTTCGTGATATCTAAGCATTTCACCGCTACACCACGAATTCCGCCCACCTCTACTGTACTCAAGACTGCCAGTTTCAACTGCAATTTTACGGTTGAGCCGCAAACTTTCACAACTGACTTAACAATCCACCTACGCTCCCTTTAAACCCAATAAATCCGGATAACGCTCGGATCCTCCGTA----
>_000001706
CCTGATTGCTCCCCACGCTTTCGAGCCTCAGCGTCAGTTACAGTCCAGAGAGTCGCCTTCGCCACTGGTGTTCTTCCTAATCTCTACGCATTTCACCGCTACACTAGGAATTCCACTCTCCTCTCCTGCACTCTAGATAACCAGTTTGGAATGCAGCACCCAAGTTGAGCCCGGGTATTTCACATCCCACTTAATCATCCGCCTACGCTCCCTTTACGCCCAGTAAATCCGGATAACGCTCGCCACCTACGTA----
>_000002217
CCTGTTTGCTCCCCACGCTTTCGCACCTGAGCGTCAGTCTTTGTCCAGGGGGCCGCCTTCGCCACCGGTATTCCTCCAGATCTCTACGCATTTCACCGCTACACCTGGAATTCTACCCCCCTCTACAAGACTCTAGCTGACCAGTTTCAAATGCAGTCCCCAAGTTAAGCTCGGGGATTTCACATCTGACTTAATCAACCGCCTGCGTGCGCTTTACGCCCAGTAATTCCGATTAACGCTTGCACCCTCCGTA----
>_000002113
CCTGTTTGCTCCCCACGCTTTCGAGCCTCAGCGTCAGTTACAGTCCAGAGAGTCGCCTTCGCCACTGGTGTTCTTCCTAATCTCTACGCATTTCACCGCTACACTAGGAATTCCACTCTCCTCTCCTGCACTCTAGATAACCAGTTTGGAATGCAGCACCCAAGTTGAGCCCGGGTATTTCACATCACACTTAATCATCCGCCTACGCTCCCTTTACGCCCAGTAAATCCGGATAACGCTCGCCACCTACGTA----
>_000000546
CCTGTTTGATACCCACACTTTCGAGCATCAGTGTCAGTTGCAGTCCAGTGAGCTGCCTTCGCAATCGGAGTTCTTCGTGATATCTAAGCATTTCACCGCTACACCACGAATTCCGCCCACCTCTACTGTACTCAAGACACGCAGTATCAACTGCAATTTTACGGTTGAGCCGCAAACTTTCACAACTGACTTACATGTCCACCTACGCTCCCTTTAAACCCAATAAATCCGGATAACGCTCGGATCCTCCGTA----
>_000001117
CCTGTTTGCTCCCCACGCTTTCGAGCCTCAACGTCAGTTACCGTCCAGTAAGCCGCCTTCGCCACTGGTGTTCCTCCTAATATCTACGCATTTCACCGCTACACTAGGAATTCCGCTTACCCCTCCGGCACTCAAGTATGACAGTTTCCAATGCAGTCCACAGGTTGAGCCCATGCCTTTCACATCAGACTTGCCACACCGTCTACGCTCCCTTTACACCCAGTAAATCCGGATAACGCTTGCCCCCTACGTA----
>_000000976
CCTGTTTGCTCCCCACGCTTTCGTGCCTCAGCGTCCGATATAGATTTGTAAGCTGCCTTCGCAATCGGTGTTCTGTGTGATCTCTATGCATTTCACCGCTACACCACACATTCCGCCTACAGCATCTACTCGCTAGCAAACCAGTATCAGAGGCAGTGCCAAGGTTGAGCCTCGGAATTTCACCTCTAACTTAATCTGCCGCCTACGCACCCTTTAAACCCAATAAATCCGGATAACGCTTGGATCCTCCGTA----
>_000000735
CCTGTTTGCTCCCCACGCTTTCGTGCCTCAGTGTCAGTTTCAGTCCAGAAAGCCGCCTTCGCCACTGGTGTTCCTCCTAATATCTACGCATTTCACCGCTACACTAGGAATTCCGCTTTCCTCTCCTGTACTCTAGTTTGACAGTTTCAAAAGCAGTCCCGGGGTTGAGCCCCAGCCTTTCACTTCTGACTTGCCATACCACCTACGCACCCTTTACACCCAGTAAATCCGGATAACGCTTGCACCATACGTA----
>_000000547
CCTGTTTGCTCCCCACGCTTTCGAGCCTCAACGTCAGTCATCGTCCAGTAAGCCGCCTTCGCCACTGGTGTTCCTCCTAATATCTACGCATTTCACCGCTACACTAGGAATTCCACTTACCTCTCCGACACTCTAGTTACATAGTTTCCAATGCAGTCCCGGGGTTGAGCCCCGGGTTTTCACATCAGACTTACATAACCGTCTACGCTCCCTTTACACCCAGTAAATCCGGATAACGCTTGCCCCCTACGTA----
>_000002072
CCTGTTTGCTCCCCACGATTTCGCACCTGAGCGTCAGTCTTTGTCCAGGGGGCCGCCTTCGCCACCGGTATTCCTCCAGATCTCTACGCATTTCACCGCTACACCTGGAATTCTACCCCCCTCTACAAGACTCTAGCTTGCCAGTTTCAAATGCAGTTCCCAAGTTAAGCTCGGGGATTTCACATCTGACTTAACAAACCGCCTGCGTGCGCTTTACGCCCAGTAATTCCGATTAACGCTTGCACCCTCCGTA----
>_000001879
CCTGTTTGCTCCCCACGCTTTCGAGCCTCAACGTCAGTTACCGTCCAGTAAGCCGCCTTCGCCACTGGTGTTCTTCCTAATATCTACGCATTTCACCGCTACACTAGGAATTCCGCTTACCTCTCCGGCACTCCAGCTAAACAGTTTCCAAAGCAGTCCCGGCGTTAAGCACCGGGCTTTCACTTCAGACTTGCCTTGCCGTCTACGCTCCCTTTACACCCAGTAAATCCGGATAACGCTTGCCCCCTACGTA----
>_000000778
CCTGTTTGCTCCCCACGCTTTCGCACCTGAGCGTCAGTCTTTGTCCAGGGGGCCGCCTTCGCCACCGGTCTTCCTCCAGATCTCTACGCATTTCACCGCTACACCTGGAATTCTACCCCCCTCTACAAGACTCTAGCTTGCCAGTTTCAAATGCAGTTCCCAAGTTAAGCTCGGGGATTTCACATCTGACTTAACAAACCGCCTGAGTGCGCTTTACGCCCAGTAATTCCGATTAACGCTTGCACCCTCCGTA----
>_000002157
CCTGTTTGCTCCCCACGCTTTCGAGCCTCAACGTCAGTTACCGTCCAGTAAGCCGCCTTCGCCACTGGTGTTCCTCCTAATATCTACGCATTTCACCGCTACACTAGGAATTCCGCTTACCTCTCCGGTACTCCAGATTGACAGTTTCCAATGCAGTCCCGGGGTTGAGCCCCGGGTTTTCACATCAGACTTGCCACTCCGTCTACGCTCCCTTTACACCCAGTAAATCCGGATAACGCTTGCACCATACGTA----
>_000001670
CCTGTTTGCTCCCCACGCTTTCGAGCCTCAGCGTCAGTTACAGACCAGAGAGCCGCCTTCGCCACTGGTGTTCCTCCATATATCTACGCATTTCACCGCTACACATGGAATTCCACTCTCCTCTTCTGCACTCAAGTCTCCCAGTTTCCAATGACCCTCCCCGGTTGAGCCGGGGGCTTTCACATCAGACTTAAGAAACCGCCTGCGCTCGCTTTACGCCCAATAAATCCGGACAACGCTTGCCACCTCCGTA----
>_000001484
CCTGTTTGCTCCCCACGCTTTCGCCCCTGAGCGTCAGTCTTTGTCCAGGGGGCCGCCTTCGCCACCGGTCTTCCTCCAGATCTCTACGCATTTCACCGCTACACCTGGAATTCTACCCCCCTCTACAAGACTCTAGCTGACCAGTTTCAAATGCAGTTCCCAAGTTAAGCTCGGGGATTTCACATCTGACTTAATCAACCGCCTGCGTGCGCTTTACGCCCAGTAATTCCGATTAACGCTTGCACCCTCCGTA----
>_000001178
CCTGTTTGCTCCCCACGCTTTCGTGCCTCAGTGTCAGTAGCAGTCCAGTAAGTCGCCTTCGCCACTGGTGTTCCTCCTAATATCTACGCATTTCACCGCTACACTAGGAATTCCACTTACCTCTCCTGTACTCTAGCTAAACAGTTTCCAAAGCAGTTCCGGGGTTGAGCCCCGGATTTTCACTTCAGACTTGCCTTGCCACCTACGCACCCTTTACACCCAGTAAATCCGGATAACGCTTGCACCATACGTA----
>_000002077
CCTGTTTGCTCCCCACGCTTTCGCACCTGAGCGTCAGTCTTTGTCCAGGGGGCCGCCTTCGCCACCGGTATTCCTCCAGATCTCTACGCATTTCACCGCTACACCTGGAATTCTACCCCCCTCTACAAGACTCTAGCTTGCCAGTTTCAAATGCAGTTCCCAAGTTAAGCTCGGGGATTTCACATCTGACTTAACAAACCGCCTGCGTGCGCTTTACGCCCAGTAATTCCGATTAACGCTTGCACCCTCCGTG----
>_000001614
CCTGTTTGCTCCCCACGCTTTCGCACCTGAGCGTCAGTCTTTGTCCAGGGGGCCGCCTTCGCCACCGGTATTCCTCCAGATCTCTACGCATTTCACCGCTACACCTGGAATTCTACCCCCCTCTACAAGACTCTAGCTTGCCAGTTTCAAATGCAGTTCCCAAGTTAAGCTCGGGGATTTCACATCTGACTTAACAAACCGCCTGCGTGCGCTTTACGCCCAGTAATTCCGAGTAACGCTTGCACCCTCCGTA----
>_000002180
CCTGTTTGCTCCCCACGCTTTCGCACCTTAGCGTCAGTCTTTGTCCAGGGGGCCGCCTTCGCCACCGGTATTCCTCCAGATCTCTACGCATTTCACCGCTACACCTGGAATTCTACCCCCCTCTACAAGACTCTAGCTGACCAGTTTCAAATGCAGTTCCCAAGTTAAGCTCGGGGATTTCACATCTGACTTAATCAACCGCCTGCGTGCGCTTTACGCCCAGTAATTCCGATTAACGCTTGCACCCTCCGTA----
>_000001876
CCTGTTTGCTCCCCACGCTTTCGAGCCTCAACGTCAGTTACCGTCCAGTAAGCCGCCTTCGCCACTGGTGTTCTTCCTAATATCTACGCATTTCACCGCTACACTAGGAATTCCGCTTACCTCTCCGGCACTCGAGCCAGACAGTTTCCAATGCAGTCCCAGGGTTAAGCCCTGGGTTTTCACATCAGACTTGCCTTGCCGTCTACGCTCCCTTTACACCCAGTAAATCCGGATAACGCTTGCCCCCTACGTA----
>_000002218
CCTGTTTGCTCCCCACGCTTTCGCACCTGAGCGTCAGTCTTTGTCCAGGGGGCCGCCTTCGCCACCGGTATTCCTCCAGATCTCTACGCATTTCACCGCTACACCTGGAATTCTACCCCCCTCTACAAGACTCTAGCTGACCAGTTTCAAATGCAGTTCCCAAGTTAAGCTCGGGGATTTCACATCTGACTTAATCAACCGCCTGCGTGCGCTTTACGCCCAGTAATTCCGATTAACGCTTGCGCCCTCCGTA----
>_000001373
CCTGTTTGCTCCCCACGCTTTCGCGCCTCAGCGTCAGTTACTGTCCAGCAATCCGCCTTCGCCACTGGTGTTCCTCCGTATATCTACGCATTTCACCGCTACACACGGAATTCCGATTGCCTCTCCAGCACTCAAGAACTACAGTTTCAAACGCAGGCTATGGGTTGAGCCCATAGTTTTCACGTCTGACTTGCAATCCCGCCTACACGCCCTTTACACCCAGTAAATCCGGATAACGCTTGCCACCTACGTA----
>_000002209
CCTGTTTGCTCCCCACGCTTTCGAGCCTCAGCGTCAGTTACAGTCCAGAGAGTCGCCTTCGCCACTGGTGTTCTTCCTAATCTCTACGCATTTCACCGCTACACTAGGAATTCCACTCTCCTCTCCTGCACTCTAGATAACCAGTTTGGAATGCAGCACCCAAGTTGAGCCCGGGTATTTCACATCCAACTTAATCATCCGCCTACGCTCCCTTTACGCCCAGTAAATCCGGATAACGCTCGCCACCTACGTA----

## Sheet: Ecological_Measures
Experiment	Richness	Diversity	Dominance	Number_Rare	Diversity.Bact	Richness.Bact	Diversity.Firm	Richness.Firm	Diversity.Proteo	Richness.Proteo	Diversity.Actino	Richness.Actino
AMP_DROPL_1D1	75	2.74403	0.132226	68	1.94321	30	0.111904	13	0.685115	31	0.00380293	1
AMP_PLATE_3D1	18	1.91972	0.221683	16	1.91972	18	0	0	0	0	0	0
AMP_PLATE_3D2	25	2.17518	0.164662	22	2.17518	25	0	0	0	0	0	0
BHIS_DROPL_1D1	118	3.16557	0.0843634	108	1.55433	54	0.695325	30	0.878657	33	0.0372496	1
BHIS_DROPL_1D1_SORTED	111	3.14851	0.103418	100	1.03073	43	1.04013	32	0.948953	35	0.12871	1
BHIS_DROPL_1D2	120	2.9885	0.115053	111	1.43273	52	0.562303	30	0.971849	37	0.0216219	1
BHIS_DROPL_1D3	117	3.06569	0.105518	109	1.50197	54	0.512719	26	1.01608	36	0.0349203	1
BHIS_DROPL_1D3_SORTED	114	3.13414	0.0898148	105	1.14536	47	0.812765	29	0.893459	37	0.28255	1
BHIS_DROPL_2D2	122	3.27686	0.0762619	108	1.70445	54	0.791052	33	0.742769	34	0.0385912	1
BHIS_DROPL_2D3	108	3.04208	0.109136	101	1.6323	54	0.410807	22	0.963657	31	0.0353168	1
BHIS_PLATE_3D	102	2.69518	0.119312	93	0.822401	41	1.18482	28	0.687955	33	0	0
CIPRO_DROPL_1D1	119	3.24064	0.0928821	110	1.1512	49	0.737393	26	1.32377	43	0.0282849	1
CIPRO_PLATE_3D1	61	2.60124	0.15335	57	0.0688636	8	0.693467	12	1.83891	41	0	0
CIPRO_PLATE_3D2	74	2.59874	0.14832	68	0.195249	17	0.716215	17	1.68307	39	0.00420266	1
GMM_DROPL_1D	111	2.68958	0.150672	103	0.986162	50	0.710261	22	0.971748	38	0.0214131	1
GMM_DROPL_2D	103	2.27983	0.259552	95	0.85636	47	0.739663	21	0.675425	34	0.00838044	1
GMM_PLATE_3D1	80	3.1671	0.0709643	70	1.64605	40	1.50113	39	0	0	0.019918	1
GMM_PLATE_3D2	86	3.17775	0.0719272	76	1.71332	44	1.43144	39	0.0100708	2	0.022917	1
GMM_PLATE_7D	78	3.3468	0.0504168	68	1.26717	39	2.06239	38	0	0	0.0172344	1
RAW_STOOL	123	3.64801	0.0452083	94	0.764344	50	2.72682	51	0.141123	21	0.0157207	1
VANCO_DROPL_1D1	71	2.21009	0.282408	65	0.189433	15	0.128957	15	1.8917	41	0	0
VANCO_PLATE_3D1	42	2.06351	0.236971	40	0	0	0.0186854	1	2.04482	41	0	0
VANCO_PLATE_3D2	42	2.01532	0.247865	40	0.000923834	1	0.0216929	1	1.9927	40	0	0
YCFA_DROPL_1D	114	3.04664	0.115898	103	1.4729	51	0.567413	25	0.954932	37	0.0513901	1
YCFA_DROPL_2D	120	3.15865	0.0990567	108	1.64039	51	0.590864	36	0.890248	32	0.0371421	1
YCFA_PLATE_3D1	27	1.92907	0.197285	23	0.00661429	3	1.8314	23	0	0	0.0910603	1
YCFA_PLATE_3D2	28	1.72181	0.286233	24	0.0050534	4	1.64466	23	0	0	0.0720984	1
YCFA_PLATE_7D	31	1.5385	0.375334	26	0.00731297	5	1.38829	25	0	0	0.142891	1

## Sheet: Oligotyping_Percent_Matrix
samples	CCGCGTATAG	TTGTATGCGA	CCGCGTACAG	CTTATAGTAG	TTTGCAATAA	TTGTATTCTA	CTTGCGGTAG	TCAGCTATAA	CTTGCAGTAG	TTTGCAATCA	CTGCGTGTAG	CCGCATGCGA	CCGCGTACGA	TTGTGTATAG	TCATGTATAA	TTGTATGTAG	TTGTGTACAG	TCTGCAATAA	TTATATGCGA	TTGTATGCAG	CTTGCAATAA	CTGTATGCGA	TTGTATGAGA	TCGTATGCGA	TTGTGTGCGA	CTTATAGTGG	CTTATAGTAA	CCGCGTGTAG	TTGCATGCGA	CCACGTATAG
BHIS_DROPL_1D2	25.1897	29.1856	0.859889	22.5594	7.48609	4.95701	1.71978	1.36571	2.02327	1.1128	1.6692	0.0505817	0.101163	0.101163	0.708144	0	0	0.101163	0.30349	0	0.0505817	0.151745	0.0505817	0	0.101163	0.101163	0	0.0505817	0	0
BHIS_DROPL_1D1	28.2342	30.0866	1.43412	22.6173	4.27248	4.06334	0.985958	1.97192	2.24081	0.746938	0.866448	0.209143	0.298775	0.388408	0.59755	0.179265	0	0.0298775	0.179265	0	0.0298775	0.059755	0.059755	0.11951	0.0298775	0.149388	0.11951	0	0	0.0298775
BHIS_DROPL_1D3	25.6569	29.1408	1.50576	21.9663	6.37733	3.80868	1.26956	2.21435	2.71627	1.35813	1.56481	0.324771	0.177148	0.295247	0.472394	0.118099	0.0295247	0.147623	0.147623	0.0295247	0.088574	0.147623	0.0295247	0.118099	0.0295247	0.0590493	0.0295247	0.0295247	0.088574	0.0590493
BHIS_DROPL_2D2	26.75	29.4318	1.81818	19.1591	6.5	4.22727	1.31818	3.25	2.29545	1.02273	0.545455	0.613636	0.477273	0.431818	0.227273	0.568182	0.0454545	0.136364	0.159091	0	0.25	0.0909091	0.181818	0.0909091	0	0.0454545	0.113636	0.0909091	0.159091	0
BHIS_DROPL_2D3	22.4501	31.2303	1.20925	23.6067	4.94217	4.67928	1.94532	1.05152	2.31335	1.78759	1.89274	0.42061	0.210305	0.525762	0.788644	0.262881	0	0.0525762	0.157729	0	0.105152	0.0525762	0	0.0525762	0.0525762	0.105152	0.0525762	0	0.0525762	0
BHIS_PLATE_3D	27.179	12.3243	40.0187	2.43674	9.79381	1.78069	1.07779	2.81162	0.702905	0.187441	0.187441	0.0468604	0.234302	0.0468604	0.187441	0	0.0937207	0.234302	0.0937207	0	0.140581	0.140581	0	0.187441	0.0937207	0	0	0	0	0
GMM_DROPL_1D	28.176	32.5763	1.63236	11.4265	10.4329	5.25195	0.993612	3.05181	2.20014	0.212917	1.2775	0.141945	0.283889	0.425834	0.709723	0.0709723	0	0.212917	0	0	0.354862	0.0709723	0.0709723	0	0	0.141945	0	0.0709723	0.0709723	0.141945
GMM_DROPL_2D	31.3422	30.6395	1.26493	8.78426	12.7196	5.48138	0.913563	5.55165	0.843289	0.140548	0.491918	0.0702741	0	0.140548	0.421644	0.35137	0	0.140548	0	0	0.210822	0.281096	0.0702741	0.0702741	0	0	0	0	0.0702741	0
GMM_PLATE_3D1	30.4569	23.7368	23.8132	3.88189	3.74189	3.29642	3.83098	0.700013	0.0127275	1.08184	0.496373	1.31093	0.674558	0.636375	0.05091	0.61092	0.521828	0.190913	0.076365	0.40728	0.05091	0.05091	0.0636375	0.114548	0.0636375	0.025455	0.0127275	0.0381825	0	0.05091
GMM_PLATE_3D2	29.359	23.5619	23.2183	4.94547	4.58688	3.80995	4.94547	0.627521	0.014941	1.03093	0.537875	0.821754	0.732108	0.358584	0.0747049	0.388466	0.268938	0.104587	0.0747049	0.194233	0.014941	0.0448229	0.104587	0.0448229	0.0448229	0	0.014941	0.014941	0	0.0597639
GMM_PLATE_7D	23.0137	26.0959	28.9384	2.15753	9.45205	3.80137	1.43836	1.40411	0.0342466	0.890411	0.308219	0.410959	0.342466	0.376712	0.0684932	0.171233	0.205479	0.10274	0.10274	0.205479	0	0.10274	0.171233	0.0342466	0.0342466	0	0	0.136986	0	0
RAW_STOOL_DNA	22.8571	26.0714	6.30952	12.5	8.33333	3.45238	7.14286	0.595238	1.19048	5.11905	3.57143	0	0	0.238095	0.714286	0.119048	0	0.357143	0.238095	0	0.238095	0.119048	0.238095	0	0.357143	0	0.238095	0	0	0
YCFA_DROPL_1D	22.1426	32.3377	2.11071	18.1601	9.04022	5.73477	1.63282	0.955795	4.1816	0.438072	1.27439	0.0796495	0	0.0398248	0.876145	0.0796495	0.0796495	0.0398248	0.199124	0	0.238949	0	0	0	0.119474	0.119474	0.0398248	0.0796495	0	0
YCFA_DROPL_2D	29.1946	24.3848	2.40492	19.1834	11.745	2.57271	0.838926	1.90157	5.25727	0	0.838926	0.111857	0.167785	0.0559284	0.33557	0	0	0.111857	0.279642	0	0.167785	0.167785	0.167785	0	0	0	0.111857	0	0	0
YCFA_PLATE_3D1	0	62.5	0	0	0	25	0	0	0	0	0	0	0	0	0	0	0	12.5	0	0	0	0	0	0	0	0	0	0	0	0
YCFA_PLATE_3D2	0	50	0	0	0	25	0	25	0	0	0	0	0	0	0	0	0	0	0	0	0	0	0	0	0	0	0	0	0	0
YCFA_PLATE_7D	0	57.1429	0	14.2857	0	0	14.2857	0	0	0	0	0	0	0	14.2857	0	0	0	0	0	0	0	0	0	0	0	0	0	0	0

## Sheet: Oligotyping_Representatives
>CCGCGTATAG
TACGGAGGATCCGAGCGTTATCCGGATTTATTGGGTTTAAAGGGAGCGTAGGCGGACGCTTAAGTCAGTTGTGAAAGTTTGCGGCTCAACCGTAAAATTGCAGTTGATACTGGGTGTCTTGAGTACAGTAGAGGCAGGCGGAATTCGTGGTGTAGCGGTGAAATGCTTAGATATCACGAAGAACTCCGATTGCGAAGGCAGCTTGCTGGACTGTAACTGACGCTGATGCTCGAAAGTGTGGGTATCAAACAGG----
>TTGTATGCGA
TACGGAGGATCCGAGCGTTATCCGGATTTATTGGGTTTAAAGGGAGCGTAGATGGATGTTTAAGTCAGTTGTGAAAGTTTGCGGCTCAACCGTAAAATTGCAGTTGATACTGGATATCTTGAGTGCAGTTGAGGCAGGCGGAATTCGTGGTGTAGCGGTGAAATGCTTAGATATCACGAAGAACTCCGATTGCGAAGGCAGCCTGCTAAGCTGCAACTGACATTGAGGCTCGAAAGTGTGGGTATCAAACAGG----
>CCGCGTACAG
TACGGAGGATCCGAGCGTTATCCGGATTTATTGGGTTTAAAGGGAGCGTAGGCGGACGCTTAAGTCAGTTGTGAAAGTTTGCGGCTCAACCGTAAAATTGCAGTTGATACTGGGTGTCTTGAGTACAGTAGAGGCAGGCGGAATTCGTGGTGTAGCGGTGAAATGCTTAGATATCACGAAGAACTCCGATTGCGAAGGCAGCCTGCTGGACTGTAACTGACGCTGATGCTCGAAAGTGTGGGTATCAAACAGG----
>CTTATAGTAG
TACGGAGGATCCGAGCGTTATCCGGATTTATTGGGTTTAAAGGGAGCGTAGGCGGATTATTAAGTCAGTTGTGAAAGTTTGCGGCTCAACCGTAAAATTGCAGTTGATACTGGTAGTCTTGAGTGCAGCAGAGGTAGGCGGAATTCGTGGTGTAGCGGTGAAATGCTTAGATATCACGAAGAACTCCGATTGCGAAGGCAGCTTACTGGACTGTAACTGACGCTGATGCTCGAAAGTGTGGGTATCAAACAGG----
>TTTGCAATAA
TACGGAGGATCCGAGCGTTATCCGGATTTATTGGGTTTAAAGGGAGCGTAGGTGGATTGTTAAGTCAGTTGTGAAAGTTTGCGGCTCAACCGTAAAATTGCAGTTGAAACTGGCAGTCTTGAGTACAGTAGAGGTGGGCGGAATTCGTGGTGTAGCGGTGAAATGCTTAGATATCACGAAGAACTCCGATTGCGAAGGCAGCTCACTAGACTGCAACTGACACTGATGCTCGAAAGTGTGGGTATCAAACAGG----
>TTGTATTCTA
TACGGAGGATCCGAGCGTTATCCGGATTTATTGGGTTTAAAGGGAGCGTAGATGGATGTTTAAGTCAGTTGTGAAAGTTTGCGGCTCAACCGTAAAATTGCAGTTGATACTGGATGTCTTGAGTTCAGTTGAGGCAGGCGGAATTCGTGGTGTAGCGGTGAAATGCTTAGATATCACGAAGAACTCCGATTGCGAAGGCAGCCTGCTAATCTGCGACTGACATTGAGGCTCGAAAGTGTGGGTATCAAACAGG----
>CTTGCGGTAG
TACGGAGGATCCGAGCGTTATCCGGATTTATTGGGTTTAAAGGGAGCGTAGGCGGGTTGTTAAGTCAGTTGTGAAAGTTTGCGGCTCAACCGTAAAATTGCAGTTGATACTGGCGACCTTGAGTGCAACAGAGGTAGGCGGAATTCGTGGTGTAGCGGTGAAATGCTTAGATATCACGAAGAACTCCGATTGCGAAGGCAGCTTACTGGATTGTAACTGACGCTGATGCTCGAAAGTGTGGGTATCAAACAGG----
>TCAGCTATAA
TACGGAGGATCCGAGCGTTATCCGGATTTATTGGGTTTAAAGGGAGCGTAGGTGGACAGTTAAGTCAGTTGTGAAAGTTTGCGGCTCAACCGTAAAATTGCAGTTGATACTGGCTGTCTTGAGTACAGTAGAGGTGGGCGGAATTCGTGGTGTAGCGGTGAAATGCTTAGATATCACGAAGAACTCCGATTGCGAAGGCAGCTCACTGGACTGCAACTGACACTGATGCTCGAAAGTGTGGGTATCAAACAGG----
>CTTGCAGTAG
TACGGAGGATCCGAGCGTTATCCGGATTTATTGGGTTTAAAGGGAGCGTAGGCGGATTGTTAAGTCAGTTGTGAAAGTTTGCGGCTCAACCGTAAAATTGCAGTTGATACTGGCAGTCTTGAGTGCAGTAGAGGTGGGCGGAATTCGTGGTGTAGCGGTGAAATGCTTAGATATCACGAAGAACTCCGATTGCGAAGGCAGCTCACTGGAGTGTAACTGACGCTGATGCTCGAAAGTGTGGGTATCAAACAGG----
>TTTGCAATCA
TACGGAGGATCCGAGCGTTATCCGGATTTATTGGGTTTAAAGGGAGCGTAGATGGGTTGTTAAGTCAGTTGTGAAAGTTTGCGGCTCAACCGTAAAATTGCAATTGATACTGGCAGTCTTGAGTACAGTTGAGGTAGGCGGAATTCGTGGTGTAGCGGTGAAATGCTTAGATATCACGAAGAACTCCGATTGCGAAGGCAGCTTACTAACCTGTAACTGACATTGATGCTCGAAAGTGTGGGTATCAAACAGG----
>CTGCGTGTAG
TACGGAGGATCCGAGCGTTATCCGGATTTATTGGGTTTAAAGGGAGCGTAGGCGGGTGCTTAAGTCAGTTGTGAAAGTTTGCGGCTCAACCGTAAAATTGCAGTTGATACTGGGTACCTTGAGTGCAGCATAGGTAGGCGGAATTCGTGGTGTAGCGGTGAAATGCTTAGATATCACGAAGAACTCCGATTGCGAAGGCAGCTTACTGGACTGTAACTGACGCTGATGCTCGAAAGTGTGGGTATCAAACAGG----
>CCGCATGCGA
TACGGAGGATCCGAGCGTTATCCGGATTTATTGGGTTTAAAGGGAGCGTAGGCGGACGCTTAAGTCAGTTGTGAAAGTTTGCGGCTCAACCGTAAAATTGCAGTTGATACTGGATATCTTGAGTGCAGTTGAGGCAGGCGGAATTCGTGGTGTAGCGGTGAAATGCTTAGATATCACGAAGAACTCCGATTGCGAAGGCAGCCTGCTAAGCTGCAACTGACATTGAGGCTCGAAAGTGTGGGTATCAAACAGG----
>CCGCGTACGA
TACGGAGGATCCGAGCGTTATCCGGATTTATTGGGTTTAAAGGGAGCGTAGGCGGACGCTTAAGTCAGTTGTGAAAGTTTGCGGCTCAACCGTAAAATTGCAGTTGATACTGGGTGTCTTGAGTACAGTAGAGGCAGGCGGAATTCGTGGTGTAGCGGTGAAATGCTTAGATATCACGAAGAACTCCGATTGCGAAGGCAGCCTGCTAAGCTGCAACTGACATTGAGGCTCGAAAGTGTGGGTATCAAACAGG----
>TTGTGTATAG
TACGGAGGATCCGAGCGTTATCCGGATTTATTGGGTTTAAAGGGAGCGTAGATGGATGTTTAAGTCAGTTGTGAAAGTTTGCGGCTCAACCGTAAAATTGCAGTTGATACTGGGTGTCTTGAGTACAGTAGAGGCAGGCGGAATTCGTGGTGTAGCGGTGAAATGCTTAGATATCACGAAGAACTCCGATTGCGAAGGCAGCTTGCTGGACTGTAACTGACGCTGATGCTCGAAAGTGTGGGTATCAAACAGG----
>TCATGTATAA
TACGGAGGATCCGAGCGTTATCCGGATTTATTGGGTTTAAAGGGAGCGTAGGTGGACATGTAAGTCAGTTGTGAAAGTTTGCGGCTCAACCGTAAAATTGCAGTTGATACTGCGTGTCTTGAGTACAGTAGAGGTGGGCGGAATTCGTGGTGTAGCGGTGAAATGCTTAGATATCACGAAGAACTCCGATTGCGAAGGCAGCTCACTGGACTGCAACTGACACTGATGCTCGAAAGTGTGGGTATCAAACAGG----
>TTGTATGTAG
TACGGAGGATCCGAGCGTTATCCGGATTTATTGGGTTTAAAGGGAGCGTAGATGGATGTTTAAGTCAGTTGTGAAAGTTTGCGGCTCAACCGTAAAATTGCAGTTGATACTGGATATCTTGAGTGCAGTTGAGGCAGGCGGAATTCGTGGTGTAGCGGTGAAATGCTTAGATATCACGAAGAACTCCGATTGCGAAGGCAGCTTGCTGGACTGTAACTGACGCTGATGCTCGAAAGTGTGGGTATCAAACAGG----
>TTGTGTACAG
TACGGAGGATCCGAGCGTTATCCGGATTTATTGGGTTTAAAGGGAGCGTAGATGGATGTTTAAGTCAGTTGTGAAAGTTTGCGGCTCAACCGTAAAATTGCAGTTGATACTGGGTGTCTTGAGTACAGTAGAGGCAGGCGGAATTCGTGGTGTAGCGGTGAAATGCTTAGATATCACGAAGAACTCCGATTGCGAAGGCAGCCTGCTGGACTGTAACTGACGCTGATGCTCGAAAGTGTGGGTATCAAACAGG----
>TCTGCAATAA
TACGGAGGATCCGAGCGTTATCCGGATTTATTGGGTTTAAAGGGAGCGTAGGTGGACTGGTAAGTCAGTTGTGAAAGTTTGCGGCTCAACCGTAAAATTGCAGTTGATACTGTCAGTCTTGAGTACAGTAGAGGTGGGCGGAATTCGTGGTGTAGCGGTGAAATGCTTAGATATCACGAAGAACTCCGATTGCGAAGGCAGCTCACTGGACTGCAACTGACACTGATGCTCGAAAGTGTGGGTATCAAACAGG----
>TTATATGCGA
TACGGAGGATCCGAGCGTTATCCGGATTTATTGGGTTTAAAGGGAGCGTAGATGGATATTTAAGTCAGTTGTGAAAGTTTGCGGCTCAACCGTAAAATTGCAGTTGATACTGGATATCTTGAGTGCAGTTGAGGCAGGCGGAATTCGTGGTGTAGCGGTGAAATGCTTAGATATCACGAAGAACTCCGATTGCGAAGGCAGCCTGCTAAGCTGCAACTGACATTGAGGCTCGAAAGTGTGGGTATCAAACAGG----
>TTGTATGCAG
TACGGAGGATCCGAGCGTTATCCGGATTTATTGGGTTTAAAGGGAGCGTAGATGGATGTTTAAGTCAGTTGTGAAAGTTTGCGGCTCAACCGTAAAATTGCAGTTGATACTGGATATCTTGAGTGCAGTTGAGGCAGGCGGAATTCGTGGTGTAGCGGTGAAATGCTTAGATATCACGAAGAACTCCGATTGCGAAGGCAGCCTGCTGGACTGTAACTGACGCTGATGCTCGAAAGTGTGGGTATCAAACAGG----
>CTTGCAATAA
TACGGAGGATCCGAGCGTTATCCGGATTTATTGGGTTTAAAGGGAGCGTAGGCGGATTGTTAAGTCAGTTGTGAAAGTTTGCGGCTCAACCGTAAAATTGCAGTTGATACTGGCAGTCTTGAGTACAGTAGAGGTGGGCGGAATTCGTGGTGTAGCGGTGAAATGCTTAGATATCACGAAGAACTCCGATTGCGAAGGCAGCTCACTGGACTGCAACTGACACTGATGCTCGAAAGTGTGGGTATCAAACAGG----
>CTGTATGCGA
TACGGAGGATCCGAGCGTTATCCGGATTTATTGGGTTTAAAGGGAGCGTAGACGGATGTTTAAGTCAGTTGTGAAAGTTTGCGGCTCAACCGTAAAATTGCAGTTGATACTGGATATCTTGAGTGCAGTTGAGGCAGGCGGAATTCGTGGTGTAGCGGTGAAATGCTTAGATATCACGAAGAACTCCGATTGCGAAGGCAGCCTGCTAAGCTGCAACTGACATTGAGGCTCGAAAGTGTGGGTATCAAACAGG----
>TTGTATGAGA
TACGGAGGATCCGAGCGTTATCCGGATTTATTGGGTTTAAAGGGAGCGTAGATGGATGTTTAAGTCAGTTGTGAAAGTTTGCGGCTCAACCGTAAAATTGCAGTTGATACTGGATATCTTGAGTGCAGTTGAGGCAGGCGGAATTCGTGGTGTAGCGGTGAAATGCTTAGATATCACGAAGAACTCCGATTGCGAAGGCAGCATGCTAAGCTGCAACTGACATTGAGGCTCGAAAGTGTGGGTATCAAACAGG----
>TCGTATGCGA
TACGGAGGATCCGAGCGTTATCCGGATTTATTGGGTTTAAAGGGAGCGTAGATGGACGTTTAAGTCAGTTGTGAAAGTTTGCGGCTCAACCGTAAAATTGCAGTTGATACTGGATATCTTGAGTGCAGTTGAGGCAGGCGGAATTCGTGGTGTAGCGGTGAAATGCTTAGATATCACGAAGAACTCCGATTGCGAAGGCAGCCTGCTAAGCTGCAACTGACATTGAGGCTCGAAAGTGTGGGTATCAAACAGG----
>TTGTGTGCGA
TACGGAGGATCCGAGCGTTATCCGGATTTATTGGGTTTAAAGGGAGCGTAGATGGATGTTTAAGTCAGTTGTGAAAGTTTGCGGCTCAACCGTAAAATTGCAGTTGATACTGGGTATCTTGAGTGCAGTTGAGGCAGGCGGAATTCGTGGTGTAGCGGTGAAATGCTTAGATATCACGAAGAACTCCGATTGCGAAGGCAGCCTGCTAAGCTGCAACTGACATTGAGGCTCGAAAGTGTGGGTATCAAACAGG----
>CTTATAGTGG
TACGGAGGATCCGAGCGTTATCCGGATTTATTGGGTTTAAAGGGAGCGTAGGCGGATTATTAAGTCAGTTGTGAAAGTTTGCGGCTCAACCGTAAAATTGCAGTTGATACTGGTAGTCTTGAGTGCAGCAGAGGTAGGCGGAATTCGTGGTGTAGCGGTGAAATGCTTAGATATCACGAAGAACTCCGATTGCGAAGGCAGCTTACTGGGCTGTAACTGACGCTGATGCTCGAAAGTGTGGGTATCAAACAGG----
>CTTATAGTAA
TACGGAGGATCCGAGCGTTATCCGGATTTATTGGGTTTAAAGGGAGCGTAGGCGGATTATTAAGTCAGTTGTGAAAGTTTGCGGCTCAACCGTAAAATTGCAGTTGATACTGGTAGTCTTGAGTGCAGCAGAGGTAGGCGGAATTCGTGGTGTAGCGGTGAAATGCTTAGATATCACGAAGAACTCCGATTGCGAAGGCAGCTTACTGGACTGTAACTGACACTGATGCTCGAAAGTGTGGGTATCAAACAGG----
>CCGCGTGTAG
TACGGAGGATCCGAGCGTTATCCGGATTTATTGGGTTTAAAGGGAGCGTAGGCGGACGCTTAAGTCAGTTGTGAAAGTTTGCGGCTCAACCGTAAAATTGCAGTTGATACTGGGTGTCTTGAGTGCAGTAGAGGCAGGCGGAATTCGTGGTGTAGCGGTGAAATGCTTAGATATCACGAAGAACTCCGATTGCGAAGGCAGCTTGCTGGACTGTAACTGACGCTGATGCTCGAAAGTGTGGGTATCAAACAGG----
>TTGCATGCGA
TACGGAGGATCCGAGCGTTATCCGGATTTATTGGGTTTAAAGGGAGCGTAGATGGATGCTTAAGTCAGTTGTGAAAGTTTGCGGCTCAACCGTAAAATTGCAGTTGATACTGGATATCTTGAGTGCAGTTGAGGCAGGCGGAATTCGTGGTGTAGCGGTGAAATGCTTAGATATCACGAAGAACTCCGATTGCGAAGGCAGCCTGCTAAGCTGCAACTGACATTGAGGCTCGAAAGTGTGGGTATCAAACAGG----
>CCACGTATAG
TACGGAGGATCCGAGCGTTATCCGGATTTATTGGGTTTAAAGGGAGCGTAGGCGGACACTTAAGTCAGTTGTGAAAGTTTGCGGCTCAACCGTAAAATTGCAGTTGATACTGGGTGTCTTGAGTACAGTAGAGGCAGGCGGAATTCGTGGTGTAGCGGTGAAATGCTTAGATATCACGAAGAACTCCGATTGCGAAGGCAGCTTGCTGGACTGTAACTGACGCTGATGCTCGAAAGTGTGGGTATCAAACAGG----

## Sheet: Sorting_Enhancement_Ratio
	Amplification Ratio for ASVs Enhanced from <1% in Raw Stool to >1% in Droplets				Abundance					Taxonomic Assignment
ASV	BHIS_DROPL_1D1_SORTED	BHIS_DROPL_1D3_SORTED	BHIS_DROPL_1D1	BHIS_DROPL_1D3	BHIS_DROPL_1D1_SORTED	BHIS_DROPL_1D3_SORTED	BHIS_DROPL_1D1	BHIS_DROPL_1D3	RAW_STOOL	Kingdom	Phylum	Class	Order	Family	Genus	Species
1919	8.09915	24.9866			0.0140309	0.0432867	0.0092208	0.00920958	0.0017324	D_0__Bacteria	D_1__Bacteroidetes	D_2__Bacteroidia	D_3__Bacteroidales	D_4__Rikenellaceae	D_5__Alistipes	D_6__uncultured bacterium
1226		27.723			0.00380357	0.0169508	0.00764247	0.00520541	0.000611434	D_0__Bacteria	D_1__Bacteroidetes	D_2__Bacteroidia	D_3__Bacteroidales	D_4__Rikenellaceae	D_5__Alistipes	D_6__
1920	10.481	9.39762			0.0117488	0.0105344	0.000332281	0.00104108	0.00112096	D_0__Bacteria	D_1__Bacteroidetes	D_2__Bacteroidia	D_3__Bacteroidales	D_4__Rikenellaceae	D_5__Alistipes	D_6__
52	25.9197				0.0211309	0.00220264	0.00207676	0.00176183	0.000815245	D_0__Bacteria	D_1__Bacteroidetes	D_2__Bacteroidia	D_3__Bacteroidales	D_4__Rikenellaceae	D_5__Alistipes	D_6__
456	40.2274				0.0327952	0.00287301	0.0061472	0.000960999	0.000815245	D_0__Bacteria	D_1__Bacteroidetes	D_2__Bacteroidia	D_3__Bacteroidales	D_4__Rikenellaceae	D_5__Alistipes	D_6__
733	21.9799				0.017919	0.000287301	0.00257518	0.00120125	0.000815245	D_0__Bacteria	D_1__Bacteroidetes	D_2__Bacteroidia	D_3__Bacteroidales	D_4__Rikenellaceae	D_5__Alistipes	D_6__
623		20.3224			0.00312738	0.0165677	0.00731018	0.00560583	0.000815245	D_0__Bacteria	D_1__Bacteroidetes	D_2__Bacteroidia	D_3__Bacteroidales	D_4__Porphyromonadaceae	D_5__Odoribacter	D_6__
1964		4.47953			0.00152143	0.0136947	0.00423658	0.00448466	0.00305717	D_0__Bacteria	D_1__Bacteroidetes	D_2__Bacteroidia	D_3__Bacteroidales	D_4__Porphyromonadaceae	D_5__Barnesiella	D_6__
1385			1.40136	1.29799	0.00405714	0.00191534	0.0127098	0.0117722	0.0090696	D_0__Bacteria	D_1__Bacteroidetes	D_2__Bacteroidia	D_3__Bacteroidales	D_4__Porphyromonadaceae	D_5__Parabacteroides	D_6__
263			3.9353	3.6041	0.00397261	0.00248994	0.0116298	0.0106511	0.00295526	D_0__Bacteria	D_1__Bacteroidetes	D_2__Bacteroidia	D_3__Bacteroidales	D_4__Bacteroidaceae	D_5__Bacteroides	D_6__
3	8.72518				0.0684642	0.00258571	0.00606413	0.00264275	0.00784673	D_0__Bacteria	D_1__Firmicutes	D_2__Clostridia	D_3__Clostridiales	D_4__Ruminococcaceae	D_5__Ruminococcaceae UCG-013	D_6__uncultured bacterium
2207	55.1572	139.555	197.271		0.0112417	0.0284428	0.040206	0.0062465	0.000203811	D_0__Bacteria	D_1__Firmicutes	D_2__Clostridia	D_3__Clostridiales	D_4__Clostridiaceae 1	D_5__Clostridium sensu stricto 1	D_6__
509				1.74185	0.00245119	0.00890634	0.00971922	0.0172179	0.00988485	D_0__Bacteria	D_1__Firmicutes	D_2__Clostridia	D_3__Clostridiales	D_4__Lachnospiraceae	D_5__	D_6__
850	41.8271	39.7386			0.0298369	0.0283471	0.00132912	0.00344358	0.000713339	D_0__Bacteria	D_1__Firmicutes	D_2__Bacilli	D_3__Lactobacillales	D_4__Lactobacillaceae	D_5__Lactobacillus	D_6__uncultured bacterium
2086	23.076	13.0224	30.4524	19.478	0.065844	0.0371576	0.0868915	0.0555778	0.00285336	D_0__Bacteria	D_1__Firmicutes	D_2__Bacilli	D_3__Lactobacillales	D_4__Enterococcaceae	D_5__Enterococcus	D_6__
2065	7.90552	12.2903	10.5845	14.2314	0.0515595	0.0801571	0.0690314	0.0928165	0.00652196	D_0__Bacteria	D_1__Proteobacteria	D_2__Gammaproteobacteria	D_3__Enterobacteriales	D_4__Enterobacteriaceae	D_5__	D_6__
766		19.735		17.2889	0.00515595	0.0140778	0.00880545	0.0123328	0.000713339	D_0__Bacteria	D_1__Proteobacteria	D_2__Gammaproteobacteria	D_3__Enterobacteriales	D_4__Enterobacteriaceae	D_5__	D_6__
375	20.8543		14.4401		0.0297523	0.006991	0.0206014	0.00960999	0.00142668	D_0__Bacteria	D_1__Proteobacteria	D_2__Gammaproteobacteria	D_3__Enterobacteriales	D_4__Enterobacteriaceae	D_5__Hafnia-Obesumbacterium	D_6__
371	27.1638	26.5483		32.2201	0.0110726	0.0108217	0.00672869	0.0131337	0.000407623	D_0__Bacteria	D_1__Proteobacteria	D_2__Gammaproteobacteria	D_3__Enterobacteriales	D_4__Enterobacteriaceae	D_5__Hafnia-Obesumbacterium	D_6__
19	15.0893	55.7713			0.0399797	0.147769	0.00764247	0.00704733	0.00264955	D_0__Bacteria	D_1__Actinobacteria	D_2__Coriobacteriia	D_3__Coriobacteriales	D_4__Coriobacteriaceae	D_5__Collinsella	D_6__uncultured bacterium

## Sheet: Sanger_Consensus_Sequences
Sample	Genus	Species	Percent Identity	Notes	Consensus Sequence
1	Hafnia	alvei	99.65		GGTAGCGCCCTCCCGAAGGTTAAGCTACCTACTTCTTTTGCAACCCACTCCCATGGTGTGACGGGCGGTGTGTACAAGGCCCGGGAACGTATTCACCGTAGCATTCTGATCTACGATTACTAGCGATTCCGACTTCATGGAGTCGAGTTGCAGACTCCAATCCGGACTACGACATACTTTATGAGGTCCGCTTGCTCTCGCGAGTTCGCTTCTCTTTGTATATGCCATTGTAGCACGTGTGTAGCCCTACTCGTAAGGGCCATGATGACTTGACGTCATCCCCACCTTCCTCCGGTTTATCACCGGCAGTCTCCTTTGAGTTCCCGCCATTACGCGCTGGCAACAAAGGATAAGGGTTGCGCTCGTTGCGGGACTTAACCCAACATTTCACAACACGAG…
2	Hafnia	sp. B315	99.86		TGCAAGTCGAGCGGTAGCACAAGAGAGCTTGCTCTCTGGGTGACGAGCGGCGGACGGGTGAGTAATGTCTGGGAAACTGCCTGATGGAGGGGGATAACTACTGGAAACGGTAGCTAATACCGCATGACGTCTTCGGACCAAAGTGGGGGACCTTCGGGCCTCACGCCATCAGATGTGCCCAGATGGGATTAGCTAGTAGGTGGGGTAATGGCTCACCTAGGCGACGATCTCTAGCTGGTCTGAGAGGATGACCAGCCACACTGGAACTGAGACACGGTCCAGACTCCTACGGGAGGCAGCAGTGGGGAATATTGCACAATGGGCGCAAGCCTGATGCAGCCATGCCGCGTGTATGAAGAAGGCCTTCGGGTTGTAAAGTACTTTCAGCGAGGAGGAAGG…
3	Enterococcus	faecium	99.79		TGCAGTCGTACGCTTCTTTTTCCACCGGAGCTTGCTCCACCGGAAAAAGAGGAGTGGCGAACGGGTGAGTAACACGTGGGTAACCTGCCCATCAGAAGGGGATAACACTTGGAAACAGGTGCTAATACCGTATAACAATCGAAACCGCATGGTTTTGATTTGAAAGGCGCTTTCGGGTGTCGCTGATGGATGGACCCGCGGTGCATTAGCTAGTTGGTGAGGTAACGGCTCACCAAGGCCACGATGCATAGCCGACCTGAGAGGGTGATCGGCCACATTGGGACTGAGACACGGCCCAAACTCCTACGGGAGGCAGCAGTAGGGAATCTTCGGCAATGGACGAAAGTCTGACCGAGCAACGCCGCGTGAGTGAAGAAGGTTTTCGGATCGTAAAACTCT…
4	Hafnia	alvei	99.57		TGCAGTCGAGCGGTAGCACAAGAGAGCTTGCTCTCTGGGTGACGAGCGGCGGACGGGTGAGTAATGTCTGGGAAACTGCCTGATGGAGGGGGATAACTACTGGAAACGGTAGCTAATACCGCATGACGTCTTCGGACCAAAGTGGGGGACCTTCGGGCCTCACGCCATCAGATGTGCCCAGATGGGATTAGCTAGTAGGTGGGGTAATGGCTCACCTAGGCGACGATCTCTAGCTGGTCTGAGAGGATGACCAGCCACACTGGAACTGAGACACGGTCCAGACTCCTACGGGAGGCAGCAGTGGGGAATATTGCACAATGGGCGCAAGCCTGATGCAGCCATGCCGCGTGTATGAAGAAGGCCTTCGGGTTGTAAAGTACTTTCAGCGAGGAGGAAGGC…
5	Hafnia	sp.	99.72		AGCGCCCTCCCGAAGGTTAAGCTACCTACTTCTTTTGCAACCCACTCCCATGGTGTGACGGGCGGTGTGTACAAGGCCCGGGAACGTATTCACCGTAGCATTCTGATCTACGATTACTAGCGATTCCGACTTCATGGAGTCGAGTTGCAGACTCCAATCCGGACTACGACATACTTTATGAGGTCCGCTTGCTCTCGCGAGTTCGCTTCTCTTTGTATATGCCATTGTAGCACGTGTGTAGCCCTACTCGTAAGGGCCATGATGACTTGACGTCATCCCCACCTTCCTCCGGTTTATCACCGGCAGTCTCCTTTGAGTTCCCGACATGACTCGCTGGCAACAAAGGATAAGGGTTGCGCTCGTTGCGGGACTTAACCCAACATTTCACAACACGAGCTG…
6	Hafnia	paralvei	99.79		AGCGCCCTCCCGAAGGTTAAGCTACCTACTTCTTTTGCAACCCACTCCCATGGTGTGACGGGCGGTGTGTACAAGGCCCGGGAACGTATTCACCGTAGCATTCTGATCTACGATTACTAGCGATTCCGACTTCATGGAGTCGAGTTGCAGACTCCAATCCGGACTACGACATACTTTATGAGGTCCGCTTGCTCTCGCGAGTTCGCTTCTCTTTGTATATGCCATTGTAGCACGTGTGTAGCCCTACTCGTAAGGGCCATGATGACTTGACGTCATCCCCACCTTCCTCCGGTTTATCACCGGCAGTCTCCTTTGAGTTCCCGACATGACTCGCTGGCAACAAAGGATAAGGGTTGCGCTCGTTGCGGGACTTAACCCAACATTTCACAACACGAGCTG…
7	Enterococcus	faecium	99.51		TGCTCCAAAAGGTTACCTCACCGACTTCGGGTGTTACAAACTCTCGTGGTGTGACGGGCGGTGTGTACAAGGCCCGGGAACGTATTCACCGCGGCGTGCTGATCCGCGATTACTAGCGATTCCGGCTTCATGCAGGCGAGTTGCAGCCTGCAATCCGAACTGAGAGAAGCTTTAAGAGATTAGCTTAGCCTCGCGACTTCGCAACTCGTTGTACTTCCCATTGTAGCACGTGTGTAGCCCAGGTCATAAGGGGCATGATGATTTGACGTCATCCCCACCTTCCTCCGGTTTGTCACCGGCAGTCTTGCTAGAGTGCCCAACTGAATGATGGCAACTAACAATAAGGGTTGCGCTCGTTGCGGGACTTAACCCAACATCTCACGACACGAGCTGACGACA…
8	Enterococcus	sp.	96.97	Noisy 27F and 1492R reads. Consensus formed from just 1492R read	ACCGACTTCNGGNGTTACAAACTCTCGTGGTGTGACGGGCGGTGTGTACAAGGCCCGGGAACGTATTCACCGCGGCGTGCTGATCCGCGATTACTAGCGATTCCGGCTTCATGCAGGCAAGTTGCAACCTGCAATCCGAACTGANAGAAGCTTTAAAAGATTAGCTGATCCTCNCGACTTCNCAACTCGTTGTACTTCCCATTGTANCACGNGTGTAGCCCANGNCATAAGGGGNATGATGATTTGACGTCNTCCCCACCTTCCTCCGGTTTGTCACCGGCAGTCTTGCTAGAGTGCCCAACTGAATGATGGCAACTAACAATAAGGGTTGCGCTCGTTGCGGGACTTAACCCAACATCTCACGACACGAGCTGACNACAACCATGCACCACCTGTCAC…
9	Enterococcus	sp.	94.79	Noisy 27F and 1492R reads. Consensus formed from just 1492R read	TGACGGGNGGTGGGTACAAGGCCCGGGAACGNATTCACCGCGGNGTGCTGATCCGCGATTACTAGCGATTCCGGCTTCATGAAGGNAAGTTGCAACCTGCAATCCGAACTGAGAGAAGCTTTAGAAGATTAGTTGATCCTCNCGACTTCNCAACTCGTTGTACTTCCCATTGNAGNACGGGGGNAGCCCACGNCATAAGGGGNATGATGATTTGACGCCTTCCCCACCTTCCTCCGGTTTGTCACCGGCAGTCTTGCTAGAGTGCCCAACTGAATGATGGCAACTAACAATAAGGGTTGCGCTCGTTGCGGGACTTAACCCAACATCTCACGACACGAGCTGACGACAACCATGCACCACCTGTCACTTTGCCCCCGAAGGGGAAGCTCTATCTCTAGA…
10	Hafnia	paralvei	99.57		GAAGGTTAAGCTACCTACTTCTTTTGCAACCCACTCCCATGGTGTGACGGGCGGTGTGTACAAGGCCCGGGAACGTATTCACCGTAGCATTCTGATCTACGATTACTAGCGATTCCGACTTCATGGAGTCGAGTTGCAGACTCCAATCCGGACTACGACATACTTTATGAGGTCCGCTTGCTCTCGCGAGTTCGCTTCTCTTTGTATATGCCATTGTAGCACGTGTGTAGCCCTACTCGTAAGGGCCATGATGACTTGACGTCATCCCCACCTTCCTCCGGTTTATCACCGGCAGTCTCCTTTGAGTTCCCGACATGACTCGCTGGCAACAAAGGATAAGGGTTGCGCTCGTTGCGGGACTTAACCCAACATTTCACAACACGAGCTGACGACAGCCAT…
11	Hafnia	paralvei	99.86		CCCGAAGGTTAAGCTACCTACTTCTTTTGCAACCCACTCCCATGGTGTGACGGGCGGTGTGTACAAGGCCCGGGAACGTATTCACCGTAGCATTCTGATCTACGATTACTAGCGATTCCGACTTCATGGAGTCGAGTTGCAGACTCCAATCCGGACTACGACATACTTTATGAGGTCCGCTTGCTCTCGCGAGTTCGCTTCTCTTTGTATATGCCATTGTAGCACGTGTGTAGCCCTACTCGTAAGGGCCATGATGACTTGACGTCATCCCCACCTTCCTCCGGTTTATCACCGGCAGTCTCCTTTGAGTTCCCGACATGACTCGCTGGCAACAAAGGATAAGGGTTGCGCTCGTTGCGGGACTTAACCCAACATTTCACAACACGAGCTGACGACAGC…
12	Bacteroides	uniformis	100		CGAGGGGCAGCATGAACTTAGCTTGCTAAGTTTGATGGCGACCGGCGCACGGGTGAGTAACACGTATCCAACCTGCCGATGACTCGGGGATAGCCTTTCGAAAGAAAGATTAATACCCGATGGCATAGTTCTTCCGCATGGTGGAACTATTAAAGAATTTCGGTCATCGATGGGGATGCGTTCCATTAGGTTGTTGGCGGGGTAACGGCCCACCAAGCCTTCGATGGATAGGGGTTCTGAGAGGAAGGTCCCCCACATTGGAACTGAGACACGGTCCAAACTCCTACGGGAGGCAGCAGTGAGGAATATTGGTCAATGGACGAGAGTCTGAACCAGCCAAGTAGCGTGAAGGATGACTGCCCTATGGGTTGTAAACTTCTTTTATACGGGAATAAAGTG…
13	Enterococcus	sp.	99.37		TGGCTCCAAAAGGTTACCTCACCGACTTCGGGTGTTACAAACTCTCGTGGTGTGACGGGCGGTGTGTACAAGGCCCGGGAACGTATTCACCGCGGCGTGCTGATCCGCGATTACTAGCGATTCCGGCTTCATGCAGGCGAGTTGCAGCCTGCAATCCGAACTGAGAGAAGCTTTAAGAGATTAGCTTAGCCTCGCGACTTCGCAACTCGTTGTACTTCCCATTGTAGCACGTGTGTAGCCCAGGTCATAAGGGGCATGATGATTTGACGTCATCCCCACCTTCCTCCGGTTTGTCACCGGCAGTCTTGCTAGAGTGCCCAACTGAATGATGGCAACTAACAATAAGGGTTGCGCTCGTTGCGGGACTTAACCCAACATCTCACGACACGAGCTGACGAC…
14	Enterococcus	sp.	96.9	Noisy 27F and 1492R reads. Consensus formed from just 1492R read	AAAGGTTACCTCACCGACTTCNGGNGTTACAAACTCTCGTGGTGTGACGGGNGGTGTGTACAAGGCCCGGGAACGNATTCACCGCGGCGTGCTGATCCGCGATTACTAGCGATTCCGGCTTCATGCAGGCAAGTTGCAACCTGCAATCCGAACTGAGAGAAGCTTTAAAAGATTAGTTGATCCTCNCGACTTCNCAACTCGTTGTACTTCCCATTGTAGCACGTGTGTAGCCCANGNCATAAGGGGNATGATGATTTGACGTCATCCCCACCTTCCTCCGGTTTGTCACCGGCAGTCTTGCTAGAGTGCCCAACTGAATGATGGCAACTAACAATAAGGGTTGCGCTCGTTGCGGGACTTAACCCAACATCTCACGACACGAGCTGACNACAACCATGC…
15	Bacteroides	vulgatus	99.71	Closest cultured match is B. vulgatus at 99.71. Closest uncultured match is Uncultured Organism Accession HQ790512.1	GGGCGCTCCTCGCGGTTACGCACTTCAGGTACCCCCGGCTCCCATGGCTTGACGGGCGGTGTGTACAAGGCCCGGGAACGTATTCACCGCGCCGTGGCTGATGCGCGATTACTAGCGAATCCAGCTTCGTGGAGTCGGGTTGCAGACTCCAGTCCGAACTGAGAGAGGTTTTTGGGATTGGCATCCACTCGCGTGGTAGCGGCCCTCTGTACCCCCCATTGTAACACGTGTGTAGCCCCGGACGTAAGGGCCGTGCTGATTTGACGTCATCCCCACCTTCCTCACATCTTACGATGGCAGTCTTGTCAGAGTCCTCAGCGAAACCTGTTAGTAACTGACAACAAGGGTTGCGCTCGTTATGGCACTTAAGCCGACACCTCACGGCACGAGCTGACGACA…
16	Hafnia	alvei	99.72		CCTCCCGAAGGTTAAGCTACCTACTTCTTTTGCAACCCACTCCCATGGTGTGACGGGCGGTGTGTACAAGGCCCGGGAACGTATTCACCGTAGCATTCTGATCTACGATTACTAGCGATTCCGACTTCATGGAGTCGAGTTGCAGACTCCAATCCGGACTACGACATACTTTATGAGGTCCGCTTGCTCTCGCGAGTTCGCTTCTCTTTGTATATGCCATTGTAGCACGTGTGTAGCCCTACTCGTAAGGGCCATGATGACTTGACGTCATCCCCACCTTCCTCCGGTTTATCACCGGCAGTCTCCTTTGAGTTCCCGACATTACTCGCTGGCAACAAAGGATAAGGGTTGCGCTCGTTGCGGGACTTAACCCAACATTTCACAACACGAGCTGACGAC…
17	Enterococcus	faecium	99.72		GGCGGCTGGCTCCAAAAGGTTACCTCACCGACTTCGGGTGTTACAAACTCTCGTGGTGTGACGGGCGGTGTGTACAAGGCCCGGGAACGTATTCACCGCGGCGTGCTGATCCGCGATTACTAGCGATTCCGGCTTCATGCAGGCGAGTTGCAGCCTGCAATCCGAACTGAGAGAAGCTTTAAGAGATTAGCTTAGCCTCGCGACTTCGCAACTCGTTGTACTTCCCATTGTAGCACGTGTGTAGCCCAGGTCATAAGGGGCATGATGATTTGACGTCATCCCCACCTTCCTCCGGTTTGTCACCGGCAGTCTTGCTAGAGTGCCCAACTGAATGATGGCAACTAACAATAAGGGTTGCGCTCGTTGCGGGACTTAACCCAACATCTCACGACACGAGCT…
18	Hafnia	paralvei	99.44		GGTAGCGCCCTCCCGAAGGTTAAGCTACCTACTTCTTTTGCAACCCACTCCCATGGTGTGACGGGCGGTGTGTACAAGGCCCGGGAACGTATTCACCGTAGCATTCTGATCTACGATTACTAGCGATTCCGACTTCATGGAGTCGAGTTGCAGACTCCAATCCGGACTACGACATACTTTATGAGGTCCGCTTGCTCTCGCGAGTTCGCTTCTCTTTGTATATGCCATTGTAGCACGTGTGTAGCCCTACTCGTAAGGGCCATGATGACTTGACGTCATCCCCACCTTCCTCCGGTTTATCACCGGCAGTCTCCTTTGAGTTCCCGACATGACTCGCTGGCAACAAAGGATAAGGGTTGCGCTCGTTGCGGGACTTAACCCAACATTTCACAACACGAG…
19	Bacteroides	vulgatus	99.57	Closest cultured match is B. vulgatus at 99.57. Closest uncultured match is Uncultured Organism Accession HQ790512.1	GGGCGCTCCTCGCGGTTACGCACTTCAGGTACCCCCGGCTCCCATGGCTTGACGGGCGGTGTGTACAAGGCCCGGGAACGTATTCACCGCGCCGTGGCTGATGCGCGATTACTAGCGAATCCAGCTTCGTGGAGTCGGGTTGCAGACTCCAGTCCGAACTGAGAGAGGTTTTTGGGATTGGCATCCACTCGCGTGGTAGCGGCCCTCTGTACCCCCCATTGTAACACGTGTGTAGCCCCGGACGTAAGGGCCGTGCTGATTTGACGTCATCCCCACCTTCCTCACATCTTACGATGGCAGTCTTGTCAGAGTCCTCAGCNAAACCTGTTAGTAACTGACAACAAGGGTTGCGCTCGTTATGGCACTTAAGCCGACACCTCACGGCACGAGCTGACGACA…
20	Hafnia	alvei	99.78	Short reads for both 27F and 1492R	TGCAGTCGAGCGGTAGCACAAGAGAGCTTGCTCTCTGGGTGACGAGCGGCGGACGGGTGAGTAATGTCTGGGAAACTGCCTGATGGAGGGGGATAACTACTGGAAACGGTAGCTAATACCGCATGACGTCTTCGGACCAAAGTGGGGGACCTTCGGGCCTCACGCCATCAGATGTGCCCAGATGGGATTAGCTAGTAGGTGGGGTAATGGCTCACCTAGGCGACGATCTCTAGCTGGTCTGAGAGGATGACCAGCCACACTGGAACTGAGACACGGTCCAGACTCCTACGGGAGGCAGCAGTGGGGAATATTGCACAATGGGCGCAAGCCTGATGCAGCCATGCCGCGTGTATGAAGAAGGCCTTCGGGTTGTAAAGTACTTTCAGCGAGGAGGAAGGC…
21	Hafnia	paralvei	99.64		CTCCCGAAGGTTAAGCTACCTACTTCTTTTGCAACCCACTCCCATGGTGTGACGGGCGGTGTGTACAAGGCCCGGGAACGTATTCACCGTAGCATTCTGATCTACGATTACTAGCGATTCCGACTTCATGGAGTCGAGTTGCAGACTCCAATCCGGACTACGACATACTTTATGAGGTCCGCTTGCTCTCGCGAGTTCGCTTCTCTTTGTATATGCCATTGTAGCACGTGTGTAGCCCTACTCGTAAGGGCCATGATGACTTGACGTCATCCCCACCTTCCTCCGGTTTATCACCGGCAGTCTCCTTTGAGTTCCCGACATGACTCGCTGGCAACAAAGGATAAGGGTTGCGCTCGTTGCGGGACTTAACCCAACATTTCACAACACGAGCTGACGACA…
22	Hafnia	paralvei	99.57		AGCGCCCTCCCGAAGGTTAAGCTACCTACTTCTTTTGCAACCCACTCCCATGGTGTGACGGGCGGTGTGTACAAGGCCCGGGAACGTATTCACCGTAGCATTCTGATCTACGATTACTAGCGATTCCGACTTCATGGAGTCGAGTTGCAGACTCCAATCCGGACTACGACATACTTTATGAGGTCCGCTTGCTCTCGCGAGTTCGCTTCTCTTTGTATATGCCATTGTAGCACGTGTGTAGCCCTACTCGTAAGGGCCATGATGACTTGACGTCATCCCCACCTTCCTCCGGTTTATCACCGGCAGTCTCCTTTGAGTTCCCGACATGACTCGCTGGCAACAAAGGATAAGGGTTGCGCTCGTTGCGGGACTTAACCCAACATTTCACAACACGAGCTG…
23	Enterococcus	sp.	99.78	Short reads for 27F and 1492R. Consensus formed from just 1492R read	AGATAGAGCTTCCCCTTCGGGGGCAAAGTGACAGGTGGNGCATGGTTGTCGTCAGCTCGTGTCGTGAGATGTTGGGTTAAGTCCCGCAACGAGCGCAACCCTTATTGTTAGTTGCCATCATTCAGTTGGGCACTCTAGCAAGACTGCCGGTGACAAACCGGAGGAAGGTGGGGATGACGTCAAATCATCATGCCCCTTATGACCTGGGCTACACACGTGCTACAATGGGAAGTACAACGAGTTGCGAAGTCGCGAGGCTAAGCTAATCTCTTAAAGCTTCTCTCAGTTCGGATTGCAGGCTGCAACTCGCCTGCATGAAGCCGGAATCGCTAGTAATCGCGGATCAGCACGCCGCGGTGAATACGTTCCCGGGCCTTGTACACACCGCCCGTCACACCA…
24	Bacteroides	sp.	99.64		TGCAGTCGAGGGGCAGCATGGTCTTAGCTTGCTAAGGCCGATGGCGACCGGCGCACGGGTGAGTAACACGTATCCAACCTGCCGTCTACTCTTGGACAGCCTTCTGAAAGGAAGATTAATACAAGATGGCATCATGAGTCCGCATGTTCACATGATTAAAGGTATTCCGGTAGACGATGGGGATGCGTTCCATTAGATAGTAGGCGGGGTAACGGCCCACCTAGTCTTCGATGGATAGGGGTTCTGAGAGGAAGGTCCCCCACATTGGAACTGAGACACGGTCCAAACTCCTACGGGAGGCAGCAGTGAGGAATATTGGTCAATGGGCGAGAGCCTGAACCAGCCAAGTAGCGTGAAGGATGACTGCCCTATGGGTTGTAAACTTCTTTTATAAAGGAA…
